# Supplementary material
Source: PubMed Central journal article supplement (PMC4775252)
Supplement: NIHMS761680-supplement-SM.pdf [file NIHMS761680-supplement-SM.pdf]

## Supplementary Appendix

This appendix has been provided by the authors to give readers additional information about their work.

Supplement to: The Cancer Genome Atlas Research Network. Comprehensive molecular characterization of papillary renal-cell carcinoma. *N Engl J Med* 2016;374:135-45. DOI: 10.1056/NEJMoa1505917

## Supplementary Appendix

Supplement to: The Cancer Genome Atlas Research Network\*. Comprehensive Molecular Characterization of Papillary Renal Cell Carcinoma.

### Contents

|                              |         |
|------------------------------|---------|
| Author Contributions         | page 3  |
| Experimental Procedures      | page 7  |
| Supplementary Figures S1-S21 | page 32 |
| List of Supplementary Tables | page 64 |
| References                   | page 65 |

# **Supplementary Appendix**

for

## **Comprehensive Molecular Characterization of Papillary Renal Cell Carcinoma**

The Cancer Genome Atlas Research Network\*

\*Corresponding Author:

W. Marston Linehan, M.D.

Urologic Oncology Branch,

National Cancer Institute

Building 10 CRC Room 1-5940

Bethesda, MD 20892-1107 USA

Tel: 301-496-6353

Fax: 301-402-0922

Email: [WML@nih.gov](mailto:WML@nih.gov)

## Author Contributions

### The Cancer Genome Atlas Research Network

The TCGA consortium contributed collectively to this study. Biospecimens were provided by the Tissue Source Sites and processed by the Biospecimen Core Resource. Data generation and analyses were performed by the Genome Sequencing Center, Genome Characterization Centers, and Genome Data Analysis centers. All data were released through the Data Coordinating Center. Project activities were coordinated by the National Cancer Institute and National Human Genome Research Institute Project Teams. Initial guidance in the project design was provided by the Disease Working Group.

### Analysis and Disease Working Group:

Project leaders: W. Marston Linehan<sup>1</sup> and Paul T. Spellman<sup>2</sup>. Data Coordinator and Figure Coordinator: Chad J. Creighton<sup>3</sup>. Analysis Coordinator and Manuscript Coordinator: Christopher J. Ricketts<sup>1</sup>. Writing Team: W. Marston Linehan<sup>1</sup>, Paul T. Spellman<sup>2</sup>, Chad J. Creighton<sup>3</sup>, Christopher J. Ricketts<sup>1</sup>, Ramaprasad Srinivasan<sup>1</sup>. DNA Sequence analysis: David A. Wheeler<sup>3</sup>, Paul T. Spellman<sup>2</sup>, Bradley A. Murray<sup>4</sup>, Suzanne S. Fei<sup>2</sup>, Caleb Davis<sup>3</sup>, Laura Schmidt<sup>1</sup>, Cathy D. Vocke<sup>1</sup>, Myron Peto<sup>2</sup>, Abu Amar M. Al Mamun<sup>3</sup>, Christopher J. Ricketts<sup>1</sup>. Gene fusion analysis: Eve Shinbrot<sup>3</sup>, Anurag Sethi<sup>5</sup>, David A. Wheeler<sup>3</sup>. mRNA analysis: Samira Brooks<sup>6</sup>, W. Kimryn Rathmell<sup>6</sup>, Angela N. Brooks<sup>4</sup>, Katherine A. Hoadley<sup>6</sup>, Chad J. Creighton<sup>3</sup>. microRNA analysis: A. Gordon Robertson<sup>7</sup>, Denise Brooks<sup>7</sup>, Reanne Bowlby<sup>7</sup>, Sara Sadeghi<sup>7</sup>. DNA methylation analysis: Hui Shen<sup>8</sup>, Daniel J. Weisenberger<sup>9</sup>, Moiz Bootwalla<sup>9</sup>, Stephen B. Baylin<sup>10</sup>, Peter W. Laird<sup>8</sup>. Copy number analysis: Bradley A. Murray<sup>4</sup>, Andrew D. Cherniack<sup>4</sup>, Gordon Saksena<sup>4</sup>. Protein analysis: Scott Haake<sup>11</sup>, Jun Li<sup>12</sup>, Han Liang<sup>12</sup>, Yiling Lu<sup>12</sup>, Gordon B. Mills<sup>12</sup>, Rehan Akbani<sup>12</sup>. Pathway/Integrated Analysis: Mark D.M. Leiserson<sup>13</sup>, Benjamin J. Raphael<sup>13</sup>, Katherine A. Hoadley<sup>6</sup>, Chad J. Creighton<sup>3</sup>, Suzanne S. Fei<sup>2</sup>, Pavana Anur<sup>2</sup>, Donald Bottaro<sup>1</sup>, Christopher J. Ricketts<sup>1</sup>. Pathology and Disease Group: Laurence Albiges<sup>14</sup>, Nandita Barnabas<sup>15</sup>, Toni K. Choueiri<sup>14</sup>, Bogdan Czerniak<sup>12</sup>, Andrew K. Godwin<sup>16</sup>, A Ari Hakimi<sup>17</sup>, Thai H. Ho<sup>18</sup>, James Hsieh<sup>17</sup>, Michael Ittmann<sup>3</sup>, William Y. Kim<sup>6</sup>, Bhavani Krishnan<sup>6</sup>, W. Marston Linehan<sup>1</sup>, Maria J. Merino<sup>1</sup>, Kenna R. Mills Shaw<sup>12</sup>, W. Kimryn Rathmell<sup>6</sup>, Victor E. Reuter<sup>17</sup>, Ed Reznik<sup>17</sup>, Carl Simon Shelley<sup>19</sup>, Brian Shuch<sup>5</sup>, Sabina Signoretti<sup>20</sup>, Ramaprasad Srinivasan<sup>1</sup>, Pheroze Tamboli<sup>12</sup>, George Thomas<sup>2</sup>, Satish Tickoo<sup>17</sup>

### International Genomics Consortium Biospecimen Core Resource:

Kenneth Burnett<sup>21</sup>, Daniel Crain<sup>21</sup>, Johanna Gardner<sup>21</sup>, Kevin Lau<sup>21</sup>, David Mallery<sup>21</sup>, Scott Morris<sup>21</sup>, Joseph D Paulauskis<sup>21</sup>, Robert J Penny<sup>21</sup>, Candace Shelton<sup>21</sup>, W. Troy Shelton<sup>21</sup>, Mark Sherman<sup>21</sup>, Eric Thompson<sup>21</sup>, Peggy Yena<sup>21</sup>

**Nationwide Children's Hospital Biospecimen Core Resource:**

Melissa T. Avedon<sup>22</sup>, Jay Bowen<sup>22</sup>, Julie M. Gastier-Foster<sup>22</sup>, Mark Gerken<sup>22</sup>, Kristen M. Leraas<sup>22</sup>, Tara M. Lichtenberg<sup>22</sup>, Nilsa C. Ramirez<sup>22</sup>, Tracie Santos<sup>22</sup>, Lisa Wise<sup>22</sup>, Erik Zmuda<sup>22</sup>

**TCGA Project Team:**

John A. Demchok<sup>23</sup>, Ina Felau<sup>23</sup>, Carolyn M. Hutter<sup>24</sup>, Margi Sheth<sup>23</sup>, Heidi J. Sofia<sup>24</sup>, Roy Tarnuzzer<sup>23</sup>, Zhining Wang<sup>23</sup>, Liming Yang<sup>23</sup>, Jean C. Zenklusen<sup>23</sup>, Jiashan (Julia) Zhang<sup>23</sup>

**Data Coordinating Center:**

Brenda Ayala<sup>25</sup>, Julien Baboud<sup>25</sup>, Sudha Chudamani<sup>26</sup>, Jia Liu<sup>26</sup>, Laxmi Lolla<sup>26</sup>, Rashi Naresh<sup>25</sup>, Todd Pihl<sup>25</sup>, Qiang Sun<sup>25</sup>, Yunhu Wan<sup>25</sup>, Ye Wu<sup>26</sup>

**Genome Characterization/Sequencing Centers:**

Adrian Ally<sup>7</sup>, Miruna Balasundaram<sup>7</sup>, Saianand Balu<sup>6</sup>, Rameen Beroukhim<sup>4</sup>, Tom Bodenheimer<sup>6</sup>, Christian Buhay<sup>3</sup>, Yaron S.N. Butterfield<sup>7</sup>, Rebecca Carlsen<sup>7</sup>, Scott L. Carter<sup>4</sup>, Hsu Chao<sup>3</sup>, Eric Chuah<sup>7</sup>, Amanda Clarke<sup>7</sup>, Kyle R. Covington<sup>3</sup>, Mahmoud Dahdouli<sup>3</sup>, Ninad Dewal<sup>3</sup>, Noreen Dhalla<sup>7</sup>, HarshaVardhan Doddapaneni<sup>3</sup>, Jennifer A. Drummond<sup>3</sup>, Stacey B. Gabriel<sup>4</sup>, Richard A. Gibbs<sup>3</sup>, Ranabir Guin<sup>7</sup>, Walker Hale<sup>3</sup>, Alicia Hawes<sup>3</sup>, D. Neil Hayes<sup>6</sup>, Robert A. Holt<sup>7</sup>, Alan P. Hoyle<sup>6</sup>, Stuart R. Jefferys<sup>6</sup>, Steven J.M. Jones<sup>7</sup>, Corbin D. Jones<sup>6</sup>, Divya Kalra<sup>3</sup>, Christie Kovar<sup>3</sup>, Lora Lewis<sup>3</sup>, Jie Li<sup>3</sup>, Yussanne Ma<sup>7</sup>, Marco A. Marra<sup>7</sup>, Michael Mayo<sup>7</sup>, Shaowu Meng<sup>6</sup>, Matthew Meyerson<sup>4</sup>, Piotr A. Mieczkowski<sup>6</sup>, Richard A. Moore<sup>7</sup>, Donna Morton<sup>3</sup>, Lisle E. Mose<sup>6</sup>, Andrew J. Mungall<sup>7</sup>, Donna Muzny<sup>3</sup>, Joel S. Parker<sup>6</sup>, Charles M. Perou<sup>6</sup>, Jeffrey Roach<sup>6</sup>, Jacqueline E. Schein<sup>7</sup>, Steven E. Schumacher<sup>4</sup>, Yan Shi<sup>6</sup>, Janae V. Simons<sup>6</sup>, Payal Sipahimalani<sup>7</sup>, Tara Skelly<sup>6</sup>, Matthew G. Soloway<sup>6</sup>, Carrie Sougnez<sup>4</sup>, Angela Tam<sup>7</sup>, Donghui Tan<sup>6</sup>, Nina Thiessen<sup>7</sup>, Umadevi Veluvolu<sup>6</sup>, Min Wang<sup>3</sup>, Matthew D. Wilkerson<sup>6</sup>, Tina Wong<sup>7</sup>, Junyuan Wu<sup>6</sup>, Liu Xi<sup>3</sup>, Jane Zhou<sup>3</sup>

**Genome Data Analysis Centers:**

Jason Bedford<sup>5</sup>, Fengju Chen<sup>3</sup>, Yao Fu<sup>5</sup>, Mark Gerstein<sup>5</sup>, David Haussler<sup>27</sup>, Katayoon Kasaian<sup>7</sup>, Phillip Lai<sup>9</sup>, Shiyun Ling<sup>12</sup>, Amie Radenbaugh<sup>27</sup>, David Van Den Berg<sup>9</sup>, John N. Weinstein<sup>12</sup>, Jingchun Zhu<sup>27</sup>

**Tissue Source Sites:**

Monique Albert<sup>28</sup>, Iakovina Alexopoulou<sup>29</sup>, Jeremiah J Andersen<sup>19</sup>, J. Todd Auman<sup>6</sup>, John Bartlett<sup>28</sup>, Sheldon Bastacky<sup>30</sup>, Julie Bergsten<sup>31</sup>, Michael L. Blute<sup>32</sup>, Lori Boice<sup>6</sup>, Roni J. Bollag<sup>33</sup>, Jeff Boyd<sup>34</sup>, Erik Castle<sup>18</sup>, Ying-Bei Chen<sup>17</sup>, John C. Cheville<sup>35</sup>, Erin Curley<sup>21</sup>,

Benjamin Davies<sup>30</sup>, April DeVolk<sup>31</sup>, Rajiv Dhir<sup>30</sup>, Laura Dike<sup>36</sup>, John Eckman<sup>31</sup>, Jay Engel<sup>37</sup>, Jodi Harr<sup>31</sup>, Ronald Hrebinko<sup>30</sup>, Mei Huang<sup>6</sup>, Lori Huelsenbeck-Dill<sup>38</sup>, Mary Iacocca<sup>38</sup>, Bruce Jacobs<sup>30</sup>, Michael Lobis<sup>38</sup>, Jodi K. Maranchie<sup>30</sup>, Scott McMeekin<sup>39</sup>, Jerome Myers<sup>31</sup>, Joel Nelson<sup>30</sup>, Jeremy Parfitt<sup>40</sup>, Anil Parwani<sup>30</sup>, Nicholas Petrelli<sup>38</sup>, Brenda Rabeno<sup>38</sup>, Somak Roy<sup>30</sup>, Andrew L. Salner<sup>41</sup>, Joel Slaton<sup>39</sup>, Melissa Stanton<sup>18</sup>, R. Houston Thompson<sup>35</sup>, Leigh Thorne<sup>6</sup>, Kelinda Tucker<sup>31</sup>, Paul M. Weinberger<sup>33</sup>, Cythnia Winemiller<sup>31</sup>, Leigh Anne Zach<sup>31</sup>, Rosemary Zuna<sup>39</sup>

### **Author Affiliations:**

1. Center for Cancer Research, National Cancer Institute, NIH, Bethesda, MD 20892
2. Oregon Health & Science University, Portland, OR 97239
3. Baylor College of Medicine, Houston, TX 77030
4. The Eli and Edythe L. Broad Institute of Massachusetts Institute of Technology and Harvard University Cambridge, MA 02142
5. Yale University, New Haven, CT 06520
6. University of North Carolina at Chapel Hill, Chapel Hill, NC 27599
7. Canada's Michael Smith Genome Sciences Centre, BC Cancer Agency, Vancouver, BC V5Z 4S6
8. Van Andel Research Institute, Grand Rapids, MI 49503
9. University of Southern California, Los Angeles, CA 90033
10. Johns Hopkins University, Baltimore, MD 21287
11. H. Lee Moffitt Cancer Center & Research Institute, Tampa, FL 33612
12. Univ. of Texas MD Anderson Cancer Center, Houston, TX, 77030
13. Brown University, Providence, RI, 02912, USA
14. Dana-Farber Cancer Institute, Boston, MA 02215
15. Asterand Bioscience, Detroit, MI 48202
16. University of Kansas Medical Center, Kansas City, KS 66160
17. Memorial Sloan Kettering Cancer Center, New York, NY 10065
18. Mayo Clinic, Scottsdale, Arizona 85255
19. Gundersen Medical Foundation, La Crosse, WI 54601
20. Brigham and Women's Hospital, Harvard Medical School, Boston, MA 02115
21. The International Genomics Consortium, Phoenix, AZ 85004
22. The Research Institute at Nationwide Children's Hospital, Columbus, OH 43205
23. National Cancer Institute, National Institutes of Health, Bethesda, MD 20892
24. National Human Genome Research Institute, National Institutes of Health, Bethesda, MD 20892
25. SRA International, Inc., 4300 Fair Lakes Court, Fairfax, VA 22033
26. Leidos Biomedical Research, Inc. Frederick National Laboratory for Cancer Research, Rockville MD 20850
27. University of California Santa Cruz Genomics Institute, Santa Cruz, CA 95064
28. Ontario Institute for Cancer Research, Toronto, Ontario M5G 0A3, Canada

29. St. Joseph's Healthcare Hamilton, Hamilton, Ontario L8N 3Z5, Canada
30. University of Pittsburgh Medical Center Presbyterian University Hospital, Pittsburgh, PA 15213
31. Penrose-St. Francis Health Services, Colorado Springs, CO 80907
32. Massachusetts General Hospital, Boston, MA 02114
33. Georgia Regents University, Augusta GA 30912
34. Fox Chase Cancer Center, Philadelphia, PA 19111
35. Mayo Clinic, Rochester, MN 55905
36. TechOne Site 501, Detroit, MI 48202
37. Kingston General Hospital, Kingston, Ontario K7L 5H6, Canada
38. Helen F Graham Cancer Center at Christiana Care Health Systems, Newark, DE 19713
39. University of Oklahoma Health Sciences Center, Oklahoma City, OK 73104
40. London Health Sciences Centre, London, Ontario N6A 5A5, Canada
41. Gray Cancer Center Hartford Hospital, Hartford, CT 06106

# Experimental Procedures

## Biospecimens

- Sample inclusion criteria 8
- Sample Processing 9
- Histopathological Review 9

## Copy Number Analysis Methods

- SNP Array-Based Copy Number Analysis 11

## Exome Mutation Analysis Methods

- Library Preparation: Illumina HiSeq 12
- Exome Capture 12
- Sequencing 12
- Sequence Alignment / Primary Data Analysis 13
- Mutation Detection 13
- Sub-Clonal Analysis 13

## DNA Methylation Analysis

- Array-based DNA methylation assay 14
- TCGA Data Packages 14
- *CDKN2A* Epigenetic Silencing 15
- Unsupervised Clustering 15

## mRNA Analysis Methods

- Sequencing and quantification 16
- Gene filtering and generation of tumor clusters 16
- Kaplan-Meier analysis of tumor clusters 16
- Fusion Gene Analysis 16

## MicroRNA (miRNA) Analysis Methods

- miRNA library construction, sequencing and analysis 18
- Analysis of miRs targeting *CDKN2A* 19

## Reverse Phase Protein Array (RPPA) Methods

- RPPA sample preparation and analysis 20

## Pathway Analysis Methods

- *In-silico* Ingenuity-based pathway analysis 27
- Metabolic pathway analysis 27

## Batch Effect Analysis Methods

- Assessment of batch effects 31



## **Biospecimens**

### **Sample inclusion criteria**

Surgical resection biospecimens were collected from patients diagnosed with renal papillary carcinoma, and had not received prior treatment for their disease (chemotherapy or radiotherapy). Institutional review boards at each tissue source site reviewed protocols and consent documentation and approved submission of cases to TCGA. Cases were staged according to the American Joint Committee on Cancer (AJCC). Each frozen primary tumor specimen had a companion normal tissue specimen (blood or blood components, including DNA extracted at the tissue source site). Specimens were shipped overnight using a cryoport that maintained an average temperature of less than -180°C.

Pathology quality control was performed on each tumor and normal tissue (if available) specimen from either a frozen section slide prepared by the BCR or from a frozen section slide prepared by the TSS. Hematoxylin and eosin (H&E) stained sections from each sample were subjected to independent pathology review to confirm that the tumor specimen was histologically consistent with the allowable renal papillary carcinomas and the adjacent tissue specimen contained no tumor cells. Tumor-adjacent tissue from Type II papillary carcinomas was acceptable as the sole germline control. Tumor-adjacent tissues from papillary carcinomas other than Type II were characterized if accompanied by DNA from a patient-matched blood specimen. The percent tumor nuclei, percent necrosis, and other pathology annotations were also assessed. Tumor samples with  $\geq 60\%$  tumor nuclei and  $\leq 20\%$  or less necrosis were submitted for nucleic acid extraction.

The TSSs contributing biospecimens included in this manuscript include: ABS, Asterand, Inc., Baylor, Catholic Health Initiative - Penrose St. Francis Health Services, Catholic Health Initiative - St. Joseph's Medical Center Cancer Institute, Christiana Care Health Services, Inc., Cleveland Clinic, Fox Chase Cancer Center, Gundersen Lutheran, Hartford Hospital, International Genomics Consortium, ILSbio, LLC., Mayo Clinic, MD Anderson, Memorial Sloan Kettering Cancer Center, National Cancer Institute Urologic Oncology Branch, Ontario Institute for Cancer Research, Roswell Park Cancer Institute, University of North Carolina, University of Oklahoma Health Sciences Center, and the University of Pittsburgh.

Approximately 83% of renal papillary carcinoma cases (consisting of a primary tumor and a germline control) submitted to the BCR and processed passed quality control metrics. Tumor tissue from 209 cases was submitted for reverse phase protein array analysis. The data freeze included 161 cases from KIRP batches 51, 71, 162, 194, 209, 246, 266, 281, 299, and 325.

## Sample Processing

RNA and DNA were extracted from tumor and adjacent normal tissue specimens using a modification of the DNA/RNA AllPrep kit (Qiagen). The flow-through from the Qiagen DNA column was processed using a *mirVana* miRNA Isolation Kit (Ambion). This latter step generated RNA preparations that included RNA <200 nt suitable for miRNA analysis. DNA was extracted from blood using the QiaAmp blood midi kit (Qiagen).

RNA samples were quantified by measuring Abs<sub>260</sub> with a UV spectrophotometer and DNA quantified by PicoGreen assay. DNA specimens were resolved by 1% agarose gel electrophoresis to confirm high molecular weight fragments. A custom Sequenom SNP panel or the AmpFISTR Identifiler (Applied Biosystems) was utilized to verify that tumor DNA and germline DNA representing a case were derived from the same patient. Five hundred nanograms of each tumor and normal DNA were sent to Qiagen (Hilden, Germany) for REPLI-g whole genome amplification using a 100 µg reaction scale. RNA was analyzed via the RNA6000 nano assay (Agilent) for determination of an RNA Integrity Number (RIN), and only analytes with RIN ≥7.0 were included in this study. Only cases yielding a minimum of 6.9 µg of tumor DNA, 5.15 µg RNA, and 4.9 µg of germline DNA were included in this study.

Samples with residual tumor tissue were considered for proteomics analysis. When available, a 10 to 20 mg piece of snap-frozen tumor adjacent to the piece used for molecular sequencing and characterization was submitted to MD Anderson for reverse phase protein array analysis.

## Histopathological Review

The tumor samples collected for the TCGA KIRP project were selected based on an histological diagnosis of papillary renal cell carcinoma (PRCC). While this is a perfectly acceptable selection criterion, it does not take into account the greater degree of heterogeneity present within this selection criterion than for instance the selection criteria of clear cell histology for the TCGA KIRC project. In general, papillary kidney tumors can be separated histologically into Type 1 PRCC, that has a distinct specific histology, or Type 2 PRCC, that can represent multiple types of histologies that are not Type 1 PRCC. Additionally, some papillary kidney tumors may demonstrate no distinct histology other than general papillae-like histology and are given no specific type but described as unclassified papillary RCC. These differing histological types may represent quite different tumors and, although some of the submitted tumors had been assigned a papillary type, this was not sufficient to effectively produce accurate sub-groups. Due to the potential importance of the heterogeneity, it was decided that the tumor samples should be reviewed by a panel of six pathologists with experience and expertise in assessing papillary kidney cancer to produce a greater depth of analysis for these samples and produce three basic sub-groups consisting of either Type 1 PRCC, Type 2 PRCC or Unclassified PRCC. These sub-groups could be used for specific analyses, such as mutation analysis, as the presence of significantly mutated genes specific to one subtype may be obscured when all the tumors are assessed as a single group. Furthermore, the accurate diagnosis of papillary kidney cancer can be challenging and all samples were re-assessed using available data to confirm their status as papillary kidney tumors and allow the removal of any questionable samples.

The six person pathology review panel assessed diagnostic slides from 131 of the potential 167 papillary kidney tumors and provided one of the following classifications for each slide:

- Type 1 papillary RCC
- Type 2 papillary RCC, including:
  - HLRCC
  - TFE3 RCC
  - Papillary RCC with oncocytic features
  - Papillary RCC with clear cell
- Unclassified papillary RCC
- Not papillary RCC, including:
  - Metanephric Adenoma/Tumor
  - Mucinous tubulo and spindle

For each of these 136 tumors a sub-grouping of either Type 1 PRCC, Type 2 PRCC or Unclassified PRCC was assigned based on the consensus of these six reviews. For the remaining 36 tumors that were not assessed by the six person pathology review panel the original TCGA pathology reports were reassessed to provide a confirmed sub-group where possible. Of the potential papillary tumors, 161 were confirmed to be PRCC consisting of 75 Type 1 PRCCs, 60 Type 2 PRCCs and 26 Unclassified PRCC. The remaining 6 tumors were either urothelial cancer (TCGA-A4-7287, TCGA-B3-4104, TCGA-HE-7130) or simply not PRCC (TCGA-A4-7828, TCGA-AL-3467, TCGA-HE-A5NK).

## Copy Number Analysis Methods

### SNP Array-Based Copy Number Analysis:

DNA from each tumor or germline sample was hybridized to Affymetrix SNP 6.0 arrays using protocols at the Genome Analysis Platform of the Broad Institute as previously described.<sup>1</sup> Briefly, from raw .CEL files, Birdseed was used to infer a preliminary copy number at each probe locus.<sup>2</sup> For each tumor, genome-wide copy number estimates were refined using tangent normalization, in which tumor signal intensities are divided by signal intensities from the linear combination of all normal samples that are most similar to the tumor.<sup>3,4</sup> This linear combination of normal samples tends to match the noise profile of the tumor better than any set of individual normal samples, thereby reducing the contribution of noise to the final copy-number profile. Individual copy-number estimates then underwent segmentation using Circular Binary Segmentation.<sup>5</sup> As part of this process of copy number assessment and segmentation, regions corresponding to germline copy-number alterations were removed by applying filters generated from the TCGA germline samples from the ovarian cancer analysis and from samples of this cohort. Segmented copy number profiles for tumor and matched control DNAs were analyzed using Ziggurat Deconstruction, an algorithm that parsimoniously assigns a length and amplitude to the set of inferred copy-number changes underlying each segmented copy number profile.<sup>6</sup> Significance of copy number alterations were assessed from the segmented data using GISTIC2.0 (Version 2.0.22).<sup>5</sup> Briefly, GISTIC2.0 deconstructs somatic copy-number alterations into broad and focal events and applies a probabilistic framework to identify location and significance levels of somatic copy-number alterations. For the purpose of this analysis, we defined an arm-level event as any event spanning more than 50% of a chromosome arm. For copy number based clustering, tumors were clustered based on log<sub>2</sub> copy number at regions revealed by GISTIC analysis. Clustering was done in R based on Euclidean distance using Ward's method. Allelic and integer copy number, tumor purity, and tumor ploidy were calculated using the ABSOLUTE algorithm.<sup>7</sup>

## Exome Mutation Analysis Methods

### Library Preparation: Illumina HiSeq

DNA samples were constructed into Illumina paired-end pre-capture libraries according to the manufacturer's protocol (Illumina Multiplexing\_SamplePrep\_Guide\_1005361\_D) with modifications as described in the *BCM-HGSC Illumina Barcoded Paired-End Capture Library Preparation* protocol. Libraries were prepared using Beckman robotic workstations (Biomek NXp and FXp models). The complete protocol and oligonucleotide sequences are accessible from the HGSC website [https://www.hgsc.bcm.edu/sites/default/files/documents/Illumina\\_Barcoded\\_Paired-End\\_Capture\\_Library\\_Preparation.pdf](https://www.hgsc.bcm.edu/sites/default/files/documents/Illumina_Barcoded_Paired-End_Capture_Library_Preparation.pdf). Briefly, 1 ug of DNA in 100ul volume was sheared into fragments of approximately 300-400 base pairs in a Covaris plate with E210 system (Covaris, Inc. Woburn, MA) followed by end-repair, A-tailing and ligation of the Illumina multiplexing PE adaptors. Pre-capture Ligation Mediated-PCR (LM-PCR) was performed for 6-8 cycles of amplification using the 2X SOLiD Library High Fidelity Amplification Mix (a custom product manufactured by Invitrogen). Universal primer IMUX-P1.0 and a pre-capture barcoded primer IBC were used in the PCR amplification. In total, a set of 12 such barcoded primers were used on these samples. Purification was performed with Agencourt AMPure XP beads after enzymatic reactions. Following the final XP beads purification, quantification and size distribution of the pre-capture LM-PCR product was determined using the LabChip GX electrophoresis system (PerkinElmer).

### Exome Capture

For the hybridization step, four pre-capture libraries were pooled together (~250 ng/sample). These pooled libraries were then hybridized in solution to the HGSC VCRome 2.1 design (42Mb, NimbleGen) according to the manufacturer's protocol *NimbleGen SeqCap EZ Exome Library SR User's Guide (Version 2.2)* with minor revisions.<sup>8</sup> Human COT1 DNA and full-length Illumina adaptor-specific blocking oligonucleotides were added into the hybridization to block repetitive genomic sequences and the adaptor sequences. Post-capture LM-PCR amplification was performed using the 2X SOLiD Library High Fidelity Amplification Mix with 14 cycles of amplification. After the final AMPure XP bead purification, quantity and size of the capture library was analyzed using the Agilent Bioanalyzer 2100 DNA Chip 7500. The efficiency of the capture was evaluated by performing a qPCR-based quality check on the four standard NimbleGen internal controls. Successful enrichment of the capture libraries was estimated to range from a 6 to 9 of  $\Delta C_t$  value over the non-enriched samples.

### Sequencing

Library templates were prepared for sequencing using Illumina's cBot cluster generation system with TruSeq PE Cluster Generation Kits. Briefly, these libraries were denatured with sodium hydroxide and diluted to 6-9 pM in hybridization buffer in order to achieve a load density of ~800K clusters/mm. Each library pool was loaded in a single lane of a HiSeq flow cell, and each lane was spiked with 1% phiX control library for run quality control. The sample libraries then underwent bridge amplification to form clonal clusters, followed by hybridization with the sequencing primer. Sequencing runs were performed in paired-end mode using the Illumina HiSeq 2000 platform. Using the TruSeq SBS Kits, sequencing-by-synthesis reactions

were extended for 101 cycles from each end, with an additional 7 cycles for the index read. Sequencing runs generated approximately 300-400 million successful reads on each lane of a flow cell, yielding 9-11 Gb per sample. With these sequencing yields, samples achieved an average of 94% of the targeted exome bases covered to a depth of 20X or greater.

### Sequence Alignment / Primary Data Analysis

Initial sequence analysis was performed using the HGSC Mercury analysis pipeline (<https://www.hgsc.bcm.edu/content/mercury>). First, the primary analysis software on the instrument produces .bcl files that are transferred off-instrument into the HGSC analysis infrastructure by the HiSeq Real-time Analysis module. Once the run is complete and all .bcl files are transferred, Mercury runs the vendor's primary analysis software (CASAVA), which demultiplexes pooled samples and generates sequence reads and base-call confidence values (qualities). The next step is the mapping of reads to the GRCh37 Human reference genome (<http://www.ncbi.nlm.nih.gov/projects/genome/assembly/grc/human/>) using the Burrows-Wheeler aligner (BWA<sup>9</sup>, <http://bio-bwa.sourceforge.net/>) and producing a BAM (binary alignment/map) file.<sup>10</sup> The third step involves quality recalibration (using GATK<sup>11</sup>, <http://www.broadinstitute.org/gatk/>), and where necessary the merging of separate sequence-event BAMs into a single sample-level BAM. BAM sorting, duplicate read marking, and realignment to improve in/del discovery all occur at this step.

### Mutation Detection

Mutation calling by multiple analysis centers was carried out, essentially as previously described.<sup>12</sup> Mutations were called using tumor and matched normal BAM files by the BCM HGSC, Broad Institute, University of California, Santa Cruz (UCSC), and British Columbia Genome Sequencing Center. The maf file is available from the following link, [https://tcga-data.nci.nih.gov/tcgafiles/ftp\\_auth/distro\\_ftpusers/anonymous/tumor/kirp/gsc/hgsc.bcm.edu/illuminaGA\\_dnaseq\\_curated/mutations/hgsc.bcm.edu\\_KIRP.IlluminaGA\\_DNASeq\\_curated.Level\\_2.1.0.0/](https://tcga-data.nci.nih.gov/tcgafiles/ftp_auth/distro_ftpusers/anonymous/tumor/kirp/gsc/hgsc.bcm.edu/illuminaGA_dnaseq_curated/mutations/hgsc.bcm.edu_KIRP.IlluminaGA_DNASeq_curated.Level_2.1.0.0/). Candidate germline mutations in *FH* gene were called by BCM HGSC, with mutations that were either nonsense or insertions/deletions (n=4 cases) or other single nucleotide variants with no entry in dbSNP (n=1) being used for downstream analyses. Candidate germline mutations in the *MET* gene similarly were called by BCM HGSC, with known familial kidney cancer associated mutations (n=3) that being used for downstream analyses. For analysis of Significantly Mutated Genes (SMGs), MutSigCV algorithm was applied<sup>13</sup>, using the set of mutation calls made concurrently by at least two of the four mutation calling centers. Four tumors, TCGA-A4-8516, TCGA-AL-3471, TCGA-B1-7332, TCGA-DW-7836, failed to produce sequencing data due to technical difficulties.

### Sub-Clonal Analysis

Sub-clonal analysis was performed using the methodology described in Totoki et al.<sup>14</sup> In brief, the median allele fraction for somatic mutations was calculated for all subjects and considered to be the clonal allele fraction. For each recurrently mutated gene (mutated 5 times or more) we calculated the paired Wilcoxon p-value of the difference in allele fractions between the gene and the median for the matched sample. P-values and false discovery rate (FDR) adjusted values are shown in the table along with the counts for each gene and the number of times the gene was seen at sub-clonal levels.

## DNA Methylation Analysis

### Array-based DNA methylation assay

We used the Illumina Infinium BeadChips (Illumina, San Diego, CA) to obtain DNA methylation profiles of 172 TCGA papillary renal cell carcinoma samples and 50 normal (non-tumor adjacent) kidney samples (156 tumors and 45 normals on the HumanMethylation450 (HM450) platform, and 16 tumors and 5 normals on the Illumina Infinium HumanMethylation27 (HM27) platform). The HM27 array targets 27,578 loci near the Transcription Start Site of 14,475 consensus coding regions in the NCBI database. The Infinium HM450 array, which incorporates nearly all the HM27 probes, targets 482,421 CpG sites and covers 99% of RefSeq genes as well as intergenic regions, with an average of 17 CpG sites per gene region distributed across the promoter, 5'UTR, first exon, gene body, and 3'UTR. This platform covers 96% of CpG islands, with additional coverage in island shores and the regions flanking them. The assay probe sequences and information for each interrogated CpG site by the HM450 and HM27 platforms can be found in the MAGE-TAB ADF (Array Design Format) file deposited on the TCGA Data Portal.

We performed bisulfite conversion on 1 µg of genomic DNA from each sample using the EZ-96 DNA Methylation Kit (Zymo Research, Irvine, CA) according to the manufacturer's instructions. We assessed the amount of bisulfite converted DNA and completeness of bisulfite conversion using a panel of MethyLight-based quality control (QC) reactions as previously described.<sup>15</sup> All the TCGA samples passed our QC tests and entered the Infinium DNA methylation assay pipeline.

Bisulfite-converted DNA was whole genome amplified (WGA) and enzymatically fragmented prior to hybridization to the arrays. BeadArrays were scanned using the Illumina iScan technology, and the IDAT files (Level 1 data) were used to extract the intensities (Level 2 data) and calculate the beta value (Level 3 data) for each probe and sample with the R-based *methylumi* package. Dye-bias normalization and normalization described in Triche et al.<sup>16</sup> were performed in the same process.

The level of DNA methylation at each CpG locus is summarized as beta ( $\beta$ ) value calculated as  $(M/(M+U))$ , ranging from 0 to 1, which represents the ratio of the methylated probe intensity to the overall intensity at each CpG locus. A p value comparing the intensity for each probe to the background level was calculated with the *methylumi* package at the same time, and data points with a detection p value  $>0.05$  were deemed not significantly different from background measurements, and therefore were masked as "NA" in the Level 3 in both HM27 and HM450 data packages, as detailed below.

### TCGA Data Packages

The three data levels are described below and are present on the TCGA Data Portal website (<http://tcga-data.nci.nih.gov/tcga/>). Please note that with continuing updates of genomic databases, data archive revisions become available at the TCGA Data Portal.

*Level 1* - Level 1 data contain raw IDAT files. IDAT files are the direct output from the scanning program.

*Level 2* - Level 2 data contain background corrected signal intensities of the M and U probes.

*Level 3* - Level 3 data files contain  $\beta$ -value calculations and masked data points with "NA" from the probes that are annotated as having a SNP within 10 base pairs or repeat within 15 base pairs of the interrogated locus. The genomic characteristics for each probe are available for download via Illumina ([www.illumina.com](http://www.illumina.com)).

### ***CDKN2A* Epigenetic Silencing**

Exon-level gene expression data were downloaded from the TCGA data, and reads per kilobase per million (RPKM) values for exon 1a (chr9:21975038-21974403) of *CDKN2A* was used to assess the expression of p16<sup>INK4a</sup>. The DNA methylation level as interrogated by cg13601799 was used for *CDKN2A*.<sup>17</sup> The DNA copy number data were obtained from Firehose ([gdac.broadinstitute.org](http://gdac.broadinstitute.org)). The expression level of exon 1a inversely correlates with DNA methylation at the interrogated CpG (Figure S7b). A beta value of 0.2 or above is considered evidence of epigenetic silencing. RPKM of Exon 1a is 0 or close to 0 for all eleven samples that met this criterion.

### **Unsupervised Clustering**

The shared probe set between HM27 and HM450 platforms (N=25,978) were used for this analysis. We removed probes that contained any masked data due to detection p value, repeats and SNPs and non-uniquely mapped probes (n=23,381 remaining). The R package FDb.InfiniumMethylation.hg19 was used to obtain chromosomal locations of the probes and 961 X-linked probes were removed from the analysis. A standard deviation for each probe was calculated across the 161 tumors in the final data freeze. We chose probes that were unmethylated in the 50 normal samples (mean beta value <0.1) that had a standard deviation of greater than 0.15 (n=343) in the tumors for the clustering. Hierarchical clustering with Ward's method was used to cluster the 161 data freeze samples, and the clustering dendrogram was cut at k=3 to yield three clusters after assessing cluster strength and stability. One of the clusters (cluster number = 3) exhibited extensive hypermethylation across thousands of CpG loci and was renamed CpG island methylator phenotype (CIMP).



## mRNA Analysis Methods

### Sequencing and quantification

One µg of total RNA was converted to mRNA libraries using the Illumina mRNA TruSeq kit (RS-122-2001 or RS-122-2002) following the manufacturer's directions. Libraries were sequenced 48x7x48bp on the Illumina HiSeq 2000 as previously described.<sup>17</sup> FASTQ files were generated by CASAVA. RNA reads were aligned to the hg19 genome assembly using MapSplice 0.7.4.<sup>18</sup> Gene expression was quantified for the transcript models corresponding to the TCGA GAF2.1 (<http://tcga-data.nci.nih.gov/docs/GAF/GAF.hg19.June2011.bundle/outputs/TCGA.hg19.June2011.gaf>), using RSEM<sup>19</sup> and normalized within-sample to a fixed upper quartile. For further details on this processing, refer to Description file at the DCC data portal under the V2\_MapSpliceRSEM workflow ([https://tcga-data.nci.nih.gov/tcgafiles/ftp\\_auth/distro\\_ftpusers/anonymous/tumor/kirp/cgcc/unc.edu/illumina/iseq\\_rnaseqv2/rnaseqv2/unc.edu\\_KIRP.IlluminaHiSeq\\_RNASeqV2.mage-tab.1.17.0/DESCRIPTION.txt](https://tcga-data.nci.nih.gov/tcgafiles/ftp_auth/distro_ftpusers/anonymous/tumor/kirp/cgcc/unc.edu/illumina/iseq_rnaseqv2/rnaseqv2/unc.edu_KIRP.IlluminaHiSeq_RNASeqV2.mage-tab.1.17.0/DESCRIPTION.txt)). FASTQ and BAM files can be found at CGHUB (<https://cghub.ucsc.edu>). Quantification of genes, transcripts, exons and junctions can be found at the TCGA Data Portal (<https://tcga-data.nci.nih.gov/tcga/>).

### Gene filtering and generation of tumor clusters

Level3 RNA-seq upper quartile normalized RSEM data for 161 tumor samples were retrieved. Gene expression values were log<sub>2</sub> transformed. Genes that were present in more than 80% of samples were included for analysis. The maximum absolute deviation (maximum value minus the average) was calculated for each gene, and the top 10% (n=2050) were included for clustering. Clustering was done using the ConsensusClusterPlus package for R.<sup>20</sup> Clusters were generated using Pearson correlation, 1000 iterations, and 80% resampling of tumors as parameters. The three subtypes were selected by a combination of significant decrease in cophenetic correlation and visual inspection of the consensus clustering matrices (Figure S11a). Clustering was verified using non-negative matrix clustering (data not shown). The three clusters contained 77 (Cluster 1), 61 (Cluster 2), and 23 (Cluster 3) samples, respectively.

### Kaplan-Meier analysis of tumor clusters

The Kaplan-Meier method was used to determine overall survival. Overall survival was defined as the time from the nephrectomy to death of any cause. Log-rank test was used to assess the survival differences of the three mRNA clusters.

### Fusion Gene Analysis

TCGA RNA sequencing data (RNA FastQ files) was downloaded for the entire KIRP set from TCGA cancer genomics hub (CGHub TCGA). We used deFuse<sup>21</sup> software version 0.6.1 with default settings to detect fusion genes. The defuse results were further filtered by removing identified read through fusions, selecting coding regions, selecting in-frame (ORF) genes and selecting samples with a defuse confidence score of >80%. Our sample set included 11 tissue adjacent normal (TAN) samples; any fusions that were also identified in the TAN sample set were removed from analysis. This filtering resulted in a list of candidate fusion genes. To

characterize these candidate fusion genes we took each spanning junction read and using the BLAT tool in UCSC genome browser examined where the reads mapped. The fusions that mapped with 100% identity to each part of the identified fusion (gene1 or gene2) were selected for further analysis. This filter removed genes that mapped to multiple locations. Next, each RNA BAM from candidate fusion genes was examined in IGV, looking for stacked soft clipped reads, changes in coverage, at the identified fusion breakpoints. The sequence of each soft clipped read was brought into the UCSC genome browser and mapped using BLAT. Only fusions that had reads that matched (100%) the identified fusion genes were considered further. Next, the IGV read surrounding the breakpoint, the fusion spanning read and the read continuing onto the partner gene were brought into EMBOSS sixpack, EMBOSS ([http://www.ebi.ac.uk/Tools/st/emboss\\_sixpack/](http://www.ebi.ac.uk/Tools/st/emboss_sixpack/)) and translated in 6 frames. The translated product that matched both identified fusion genes were considered further. The Cbio data portal (<http://www.cbioportal.org/>) was used to examine copy number data and gene expression data for each fusion identified.

## MicroRNA (miRNA) Analysis Methods

### miRNA library construction, sequencing and analysis

We generated microRNA sequence (miRNA-seq) data for 161 tumor and 32 adjacent normal samples using methods described previously.<sup>22</sup> We aligned reads to the GRCh37/hg19 reference human genome, and annotated miRNA read count abundance with miRBase v16. While we used only exact-match read alignments for this, the BAM files that are available from cgHUB (cghub.ucsc.edu<sup>23</sup>) include all sequence reads. We used miRBase v20 to assign 5p and 3p mature strand names to MIMAT accession IDs.

We identified groups of samples that had similar abundance profiles using unsupervised non-negative matrix factorization (NMF, v0.5.06) consensus clustering with default settings.<sup>24</sup> The input was a reads-per-million (RPM) data matrix for the ~300 (25%) most-variant 5p or 3p mature strands, which we parsed from the level 3 isomiR data files that are available from the TCGA data portal. After running a rank survey with 30 iterations per solution, we chose a preferred clustering solution from the cophenetic and average silhouette width score profiles, and then did a 500-iteration the main clustering run. Among other files, we wrote out a metagene (W) matrix that identified miRs that were discriminatory for NMF. We calculated a profile of silhouette widths from the NMF consensus membership matrix, and considered samples with relatively low widths within a cluster as atypical cluster members.

To generate a heatmap for the NMF results, we first identified miRs that were differentially abundant between the unsupervised miRNA clusters, using a multiclass analysis with SAMseq (samr 2.0<sup>25</sup>) in R 2.15.0, with a read-count input matrix and an FDR threshold of 0.05. For the heatmap displayed, we included the 40 miRs that had both the largest SAMseq scores, and median abundances greater than 25 RPM. The RPM filtering acknowledged potential sponge effects from competitive endogenous RNAs (ceRNAs) that can make weakly abundant miRs less influential.<sup>26,27</sup> Adding the RPM data matrix for adjacent normal samples to the NMF-ordered 40 miR x 161 tumor RPM data matrix, we transformed each row of the matrix by  $\log_{10}(\text{RPM} + 1)$ , then used the pheatmap v0.7.7 R package to scale and then cluster only the rows, with a Euclidean distance measure.

For clinical and molecular covariates, we calculated contingency table association *P*-values with a Fisher exact test in R, setting the workspace size to  $2 \cdot 10^9$ .

To identify miRs that were differentially abundant between pairs of sample groups, we used unpaired two-class SAMseq analyses (FDR < 0.05). Given potential ceRNA effects (above), we support assessing fold change at the same time as absolute miR abundance by adding, to each fold change barplot, a boxwhisker plot that shows the distribution of miR abundance in the two sample groups, and we show only miRs that had a median abundance greater than 50 RPM in at least one of the two groups being compared.

We assessed potential miRNA targeting by calculating miR-mRNA and miR-RPPA Spearman correlations with the MatrixEQTL v2.1.1<sup>28</sup> R package, using an RNAseq (RSEM) and RPPA gene-level normalized abundance data matrices from Firehose (gdac.broadinstitute.org). Restricting the RSEM matrix to the 14732 genes with a mean RSEM above the 30<sup>th</sup> percentile, and the miRs to the 606 with a mean RPM above the 60<sup>th</sup> percentile (0.46 RPM), we calculated correlations with a P-value threshold of 0.05, and filtered the resulting anticorrelations at FDR<0.05. We then extracted miR-gene pairs that corresponded to a) functional validation publications reported by MiRTarBase v4.5<sup>29</sup>, for stronger (luciferase reporter, qPCR, Western blot) vs. weaker experimental evidence types. For the genes satisfying the FDR and miRTarBase functional validation filters (strong evidence types), we identified enriched KEGG pathways (DAVID v6.7).<sup>30,31</sup> We displayed results with Cytoscape 2.8.3.<sup>32</sup>

Tumor sample purity was calculated by the Broad Institute using ABSOLUTE.<sup>33</sup>

We visualized the global relationship of somatic copy number alterations and miRNA unsupervised clustering by generating a heatmap from tumor samples for hg19 'seg' data, using IGV 2.3.40.<sup>34</sup> We identified miRNAs that were potentially dysregulated by somatic copy number alterations by calculating Spearman correlations with BH-adjusted P-values between the Gistic2 all\_data\_by\_genes file and pre-miRNA RPM abundance file. We used the corresponding all\_thresholded\_by\_genes file to compare integer sCNA levels across miRNA clusters.

### **Analysis of miRs targeting *CDKN2A***

*CDKN2A* is altered through mutation, copy number loss, or epigenetic silencing by DNA methylation in 23 samples, which were associated with type 2 pathology and were significantly associated with survival ( $p < 1e-11$ , Fig. S7e). We assessed miR targeting as an additional mechanism that may alter *CDKN2A* transcript levels and so may represent an alteration that is functionally important in samples that lack a clear driver (i.e. dark matter samples).

We first used miRTarBase v4.5<sup>29</sup> to identify miRs that have been functionally validated as directly targeting *CDKN2A*, considering records with evidence from Luciferase reporters, qPCR, and/or Western blots. We determined which of these miRs had a strong Spearman correlation with *CDKN2A* in either the tumor dataset, or the tumor-and-normal dataset.

For each miR that was correlated to *CDKN2A* transcript levels, we identified the expression value that stratified patients into two groups that minimized the Kaplan-Meier log-rank p-value.<sup>35</sup> We used these expression thresholds to define the samples in which miR targeting was likely influencing *CDKN2A* transcript levels. We added these potential miR-targeting samples to the original 23 *CDKN2A*-altered samples, and compared the Kaplan-Meier results for this extended sample set to results for the 23 samples (Fig. S7e). Finally, we used bootstrapping to assess the extended sample sets. Starting with the 23 *CDKN2A*-altered cases, we added additional samples chosen at random 50,000 times, and calculated the frequency of obtaining a smaller log-rank p-value and larger hazard ratio than in we had seen from the actual extended sample sets.

## Reverse Phase Protein Array (RPPA) Methods

### RPPA sample preparation and analysis

Protein was extracted using RPPA lysis buffer (1% Triton X-100, 50 nmol/L Hepes (pH 7.4), 150 nmol/L NaCl, 1.5 nmol/L MgCl<sub>2</sub>, 1 mmol/L EGTA, 100 nmol/L NaF, 10 nmol/L NaPPI, 10% glycerol, 1 nmol/L phenylmethylsulfonyl fluoride, 1 nmol/L Na<sub>3</sub>VO<sub>4</sub>, and aprotinin 10 Ag/mL) from human tumors and RPPA was performed as described previously.<sup>36-40</sup> Lysis buffer was used to lyse frozen tumors by Precellys homogenization. Tumor lysates were adjusted to 1 µg/µL concentration as assessed by bicinchoninic acid assay (BCA) and boiled with 1% SDS. Tumor lysates were manually diluted in fivefold serial dilutions with lysis buffer. An Aushon Biosystems 2470 arrayer (Burlington, MA) printed 1,056 samples on nitrocellulose-coated slides (Grace Bio-Labs). Slides were probed with 193 validated primary antibodies (see table below) followed by corresponding secondary antibodies (Goat anti-Rabbit IgG, Goat anti-Mouse IgG or Rabbit anti-Goat IgG). Signal was captured using a DakoCytomation catalyzed system and DAB colorimetric reaction. Slides were scanned in CanoScan 9000F. Spot intensities were analyzed and quantified using Microvigene software (VigeneTech Inc., Carlisle, MA), to generate spot signal intensities (Level 1 data). The software SuperCurveGUI<sup>38,40</sup>, available at <http://bioinformatics.mdanderson.org/Software/supercurve/>, was used to estimate the EC50 values of the proteins in each dilution series (in log<sub>2</sub> scale). Briefly, a fitted curve ("supercurve") was plotted with the signal intensities on the Y-axis and the relative log<sub>2</sub> concentration of each protein on the X-axis using the non-parametric, monotone increasing B-spline model.<sup>36</sup> During the process, the raw spot intensity data were adjusted to correct spatial bias before model fitting. A QC metric<sup>40</sup> was returned for each slide to help determine the quality of the slide: if the score is less than 0.8 on a 0-1 scale, the slide was dropped. In most cases, the staining was repeated to obtain a high quality score. If more than one slide was stained for an antibody, the slide with the highest QC score was used for analysis (Level 2 data). Protein measurements were corrected for loading as described<sup>38,40,41</sup> using median centering across antibodies (level 3 data). In total, 193 antibodies and 125 samples were used. Final selection of antibodies was also driven by the availability of high quality antibodies that consistently pass a strict validation process as previously described.<sup>42</sup> These antibodies are assessed for specificity, quantification and sensitivity (dynamic range) in their application for protein extracts from cultured cells or tumor tissue. Antibodies are labeled as validated and used with caution based on degree of validation by criteria previously described.<sup>42</sup>

Raw data (level 1), SuperCurve nonparameteric model fitting on a single array (level 2), and loading corrected data (level 3) were deposited at the DCC.

**List of Antibodies Used for Sample Profiling in RPPA Analysis.**

| Full Slide Name (Ab Name + Slide ID)   | Protein Name           | Gene Name                   | Ab Validation Status | Ab Origin | Company          | Catalog # |
|----------------------------------------|------------------------|-----------------------------|----------------------|-----------|------------------|-----------|
| X14.3.3_beta.R.V_GBL11066140           | 14-3-3-beta            | YWHAB                       | Valid                | Rabbit    | Santa Cruz       | sc-628    |
| X14.3.3_epsilon.M.C_GBL11066233        | 14-3-3-epsilon         | YWHAE                       | Use with Caution     | Mouse     | Santa Cruz       | sc-23957  |
| X14.3.3_zeta.R.V_GBL11066141           | 14-3-3-zeta            | YWHAZ                       | Valid                | Rabbit    | Santa Cruz       | sc-1019   |
| X4E.BP1.R.V_GBL11066045                | 4E-BP1                 | EIF4EBP1                    | Valid                | Rabbit    | CST              | 9452      |
| X4E.BP1_pS65.R.V_GBL11066046           | 4E-BP1_pS65            | EIF4EBP1                    | Valid                | Rabbit    | CST              | 9456      |
| X4E.BP1_pT37_T46.R.V_GBL11066047       | 4E-BP1_pT37_T46        | EIF4EBP1                    | Valid                | Rabbit    | CST              | 9459      |
| X53BP1.R.E_GBL11066155                 | 53BP1                  | TP53BP1                     | Valid                | Rabbit    | CST              | 4937      |
| ACC_pS79.R.V_GBL11066049               | ACC_pS79               | ACACA ACACB                 | Valid                | Rabbit    | CST              | 3661      |
| ACC1.R.E_GBL11066050                   | ACC1                   | ACACA                       | Under Evaluation     | Rabbit    | Epitomics        | 1768-1    |
| ACVRL1.R.C_GBL11066174                 | ACVRL1                 | ACVRL1                      | Use with Caution     | Rabbit    | Abcam            | ab108207  |
| ADAR1.M.V_GBL11066236                  | ADAR1                  | ADAR                        | Valid                | Mouse     | Abcam            | ab88574   |
| Akt.R.V_GBL11066173                    | Akt                    | AKT1 AKT2 AKT3              | Valid                | Rabbit    | CST              | 4691      |
| Akt_pS473.R.V_GBL11066075              | Akt_pS473              | AKT1 AKT2 AKT3              | Valid                | Rabbit    | CST              | 9271      |
| Akt_pT308.R.V_GBL11066202              | Akt_pT308              | AKT1 AKT2 AKT3              | Valid                | Rabbit    | CST              | 2965      |
| AMPK_alpha.R.C_GBL11066051             | AMPK-alpha             | PRKAA1                      | Use with Caution     | Rabbit    | CST              | 2532      |
| AMPK_pT172.R.V_GBL11066052             | AMPK-alpha_pT172       | PRKAA1                      | Valid                | Rabbit    | CST              | 2535      |
| Annexin.1.M.E_GBL11066239              | Annexin-I              | ANXA1                       | Valid                | Mouse     | BD Biosciences   | 610066    |
| Annexin_VII.M.V_GBL11066265            | Annexin-VII            | ANXA7                       | Valid                | Mouse     | BD Biosciences   | 610668    |
| AR.R.V_GBL11066124                     | AR                     | AR                          | Valid                | Rabbit    | Epitomics        | 1852-1    |
| A.Raf_pS299.R.C_GBL11066162            | A-Raf                  | ARAF                        | Valid                | Rabbit    | CST              | 4432      |
| ARHI.M.E_GBL11066273                   | ARHI                   | DIRAS3                      | Use with Caution     | Mouse     | MDACC Laboratory | Bast Lab  |
| ATM.R.E_GBL11066053                    | ATM                    | ATM                         | Valid                | Rabbit    | CST              | 2873      |
| Acetyl.a.Tubulin.Lys40.R.C_GBL11066205 | Acetyl-a-Tubulin-Lys40 | Several alpha tubulin genes | Use with Caution     | Rabbit    | CST              | 5335      |
| alpha.Catenin.M.V_GBL11066255          | alpha.Catenin          | CTNNA1                      | Valid                | Mouse     | Calbiochem       | CA1030    |
| ASNS.R.V_GBL11066243                   | ASNS                   | ASNS                        | Valid                | Rabbit    | Sigma            | HPA029318 |
| B.Raf.M.C_GBL11066212                  | B-Raf                  | BRAF                        | Use with Caution     | Mouse     | Santa Cruz       | sc-5284   |
| Bad_pS112.R.V_GBL11066054              | Bad_pS112              | BAD                         | Valid                | Rabbit    | CST              | 9291      |
| Bak.R.E_GBL11066055                    | Bak                    | BAK1                        | Use with Caution     | Rabbit    | Epitomics        | 1542-1    |
| Bap1c.4.M.E_GBL11066238                | BAP1                   | BAP1                        | Valid                | Mouse     | Santa Cruz       | sc-28383  |
| Bax.R.V_GBL11066056                    | Bax                    | BAX                         | Valid                | Rabbit    | CST              | 2772      |

|                                       |                    |           |                  |        |                   |             |
|---------------------------------------|--------------------|-----------|------------------|--------|-------------------|-------------|
| Bcl.2.M.V_GBL11066211                 | Bcl2               | BCL2      | Valid            | Mouse  | Dako              | M0887       |
| Bcl.xL.R.V_GBL11066058                | Bcl-xL             | BCL2L1    | Valid            | Rabbit | CST               | 2762        |
| Beclin.G.C_GBL11066241                | Beclin             | BECN1     | Use with Caution | Goat   | Santa Cruz        | sc-10086    |
| beta.Catenin.R.V_GBL11066057          | b-Catenin          | CTNNB1    | Valid            | Rabbit | CST               | 9562        |
| Bid.R.C_GBL11066059                   | Bid                | BID       | Use with Caution | Rabbit | Abcam             | ab32060     |
| Bim.R.V_GBL11066060                   | Bim                | BCL2L11   | Valid            | Rabbit | Abcam             | ab32158     |
| BRCA2.R.C_GBL11066126                 | BRCA2              | BRCA2     | Use with Caution | Rabbit | CST               | 9012        |
| c.Jun_pS73.R.V_GBL11066066            | c-Jun_pS73         | JUN       | Valid            | Rabbit | CST               | 9164        |
| c.Kit.R.V_GBL11066067                 | c-Kit              | KIT       | Valid            | Rabbit | Abcam             | ab32363     |
| c.Met_pY1235.R.V_GBL11066121          | c-Met_pY1234_Y1235 | MET       | Valid            | Rabbit | CST               | 3129        |
| c.Myc.R.C_GBL11066248                 | c-Myc              | MYC       | Use with Caution | Rabbit | Santa Cruz        | sc-764      |
| C.Raf.R.V_GBL11066133                 | C-Raf              | RAF1      | Valid            | Rabbit | Millipore         | 04-739      |
| C.Raf_pS338.R.E_GBL11066069           | C-Raf_pS338        | RAF1      | Valid            | Rabbit | CST               | 9427        |
| Caspase.7_cleavedD198.R.C_GBL11066061 | Caspase-7-cleaved  | CASP7     | Use with Caution | Rabbit | CST               | 9491        |
| Caveolin.1.R.V_GBL11066062            | Caveolin-1         | CAV1      | Valid            | Rabbit | CST               | 3238        |
| CD20.R.C_GBL11066063                  | CD20               | MS4A1     | Use with Caution | Rabbit | Epitomics         | 1632        |
| CD31.M.V_GBL11066250                  | CD31               | PECAM1    | Valid            | Mouse  | Dako              | M0823       |
| CD49b.M.V_GBL11066252                 | CD49b              | ITGA2     | Valid            | Mouse  | BD Biosciences    | 611016      |
| CDK1.R.V_GBL11066247                  | CDK1               | CDC2-CDK1 | Valid            | Rabbit | CST               | 9112        |
| Chk1.M.C_GBL11066237                  | Chk1               | CHEK1     | Use with Caution | Mouse  | CST               | 2360        |
| Chk1_pS345.R.C_GBL11066146            | Chk1_pS345         | CHEK1     | Use with Caution | Rabbit | CST               | 2348        |
| Chk2.M.E_GBL11066214                  | Chk2               | CHEK2     | Valid            | Mouse  | CST               | 3440        |
| Chk2_pT68.R.E_GBL11066209             | Chk2_pT68          | CHEK2     | Use with Caution | Rabbit | CST               | 2197        |
| clAP.R.V_GBL11066151                  | clAP               | BIRC2     | Valid            | Rabbit | Millipore         | 07-759      |
| Claudin.7.R.V_GBL11066138             | Claudin-7          | CLDN7     | Valid            | Rabbit | Novus Biologicals | NB100-91714 |
| Collagen_VI.R.V_GBL11066068           | Collagen-VI        | COL6A1    | Valid            | Rabbit | Santa Cruz        | sc-20649    |
| Cyclin_B1.R.V_GBL11066070             | Cyclin-B1          | CCNB1     | Valid            | Rabbit | Epitomics         | 1495-1      |
| Cyclin_D1.R.V_GBL11066071             | Cyclin-D1          | CCND1     | Valid            | Rabbit | Santa Cruz        | sc-718      |
| Cyclin_E1.M.V_GBL11066215             | Cyclin-E1          | CCNE1     | Valid            | Mouse  | Santa Cruz        | sc-247      |
| Cyclin_E2.R.C_GBL11066072             | Cyclin-E2          | CCNE2     | Use with Caution | Rabbit | Epitomics         | 1142        |
| DJ.1.R.E_GBL11066144                  | DJ1                | PARK7     | Valid            | Rabbit | Abcam             | ab76008     |
| Dvl3.R.V_GBL11066153                  | Dvl3               | DVL3      | Valid            | Rabbit | CST               | 3218        |
| E.Cadherin.R.V_GBL11066175            | E-Cadherin         | CDH1      | Valid            | Rabbit | CST               | 3195        |
| eEF2.R.C_GBL11066163                  | eEF2               | EEF2      | Use with Caution | Rabbit | CST               | 2332        |

|                                         |                   |             |                                        |        |                   |           |
|-----------------------------------------|-------------------|-------------|----------------------------------------|--------|-------------------|-----------|
| eEF2K.R.V_GBL11066164                   | eEF2K             | EEF2K       | Valid                                  | Rabbit | CST               | 3692      |
| EGFR.R.V_GBL11066177                    | EGFR              | EGFR        | Valid                                  | Rabbit | CST               | 2232      |
| EGFR_pY1068.R.C_GBL11066073             | EGFR_pY1068       | EGFR        | Use with Caution;<br>also sees pHer2   | Rabbit | CST               | 2234      |
| EGFR_pY1173.R.V_GBL11066074             | EGFR_pY1173       | EGFR        | Valid                                  | Rabbit | Abcam             | ab32578   |
| eIF4E.R.V_GBL11066120                   | eIF4E             | EIF4E       | Valid                                  | Rabbit | CST               | 9742      |
| eIF4G.R.C_GBL11066180                   | eIF4G             | EIF4G1      | Use with Caution                       | Rabbit | CST               | 2498      |
| ER.alpha.R.V_GBL11066076                | ER-alpha          | ESR1        | Valid                                  | Rabbit | Lab Vision        | RM-9101-S |
| ER.alpha_pS118.R.V_GBL11066077          | ER-alpha_pS118    | ESR1        | Valid                                  | Rabbit | Epitomics         | 1091-1    |
| ERCC1.M.V_GBL11066272                   | ERCC1             | ERCC1       | Valid                                  | Mouse  | Santa Cruz        | sc-17809  |
| ERK2.R.E_GBL11066078                    | ERK2              | MAPK1       | Under Evaluation                       | Rabbit | Santa Cruz        | Sc-154    |
| ETS.1.R.V_GBL11066206                   | Ets-1             | ETS1        | Valid                                  | Rabbit | Bethyl            | A303-501A |
| FASN.R.V_GBL11066203                    | FASN              | FASN        | Valid                                  | Rabbit | CST               | 3180      |
| Fibronectin.R.V_GBL11066079             | Fibronectin       | FN1         | Valid                                  | Rabbit | Epitomics         | 1574-1    |
| FoxM1.R.V_GBL11066179                   | FoxM1             | FOXO1       | Valid                                  | Rabbit | CST               | 5436      |
| FOXO3a.R.C_GBL11066178                  | FoxO3a            | FOXO3       | Use with Caution                       | Rabbit | CST               | 2497      |
| FOXO3a_pS318_S321.R.C_GBL11066080       | FoxO3a_pS318_S321 | FOXO3       | Use with Caution                       | Rabbit | CST               | 9465      |
| G6PD.M.V_GBL11066266                    | G6PD              | G6PD        | Valid                                  | Mouse  | Santa Cruz        | sc-373887 |
| Gab2.R.V_GBL11066154                    | Gab2              | GAB2        | Valid                                  | Rabbit | CST               | 3239      |
| GAPDH.M.C_GBL11066217                   | GAPDH             | GAPDH       | Use with Caution                       | Mouse  | Life Technologies | AM4300    |
| GATA3.M.V_GBL11066230                   | GATA3             | GATA3       | Valid                                  | Mouse  | BD Biosciences    | 558686    |
| GSK3.alpha.beta.M.V_GBL11066218         | GSK-3ab           | GSK3A GSK3B | Valid                                  | Mouse  | Santa Cruz        | sc-7291   |
| GSK3.alpha.beta_pS21_S9.R.V_GBL11066081 | GSK-3ab_pS21_S9   | GSK3A GSK3B | Valid                                  | Rabbit | CST               | 9331      |
| GSK3_pS9.R.V_GBL11066171                | GSK-3b_pS9        | GSK3B       | Valid                                  | Rabbit | CST               | 9336      |
| HER2.M.V_GBL11066260                    | HER2              | ERBB2       | Valid                                  | Mouse  | Lab Vision        | MS-325-P1 |
| HER2_pY1248.R.C_GBL11066168             | HER2_pY1248       | ERBB2       | Use with Caution;<br>likely sees pEGFR | Rabbit | R&D Systems       | AF1768    |
| HER3.R.V_GBL11066149                    | HER3              | ERBB3       | Valid                                  | Rabbit | Santa Cruz        | sc-285    |
| HER3_pY1289.R.C_GBL11066122             | HER3_pY1289       | ERBB3       | Use with Caution                       | Rabbit | CST               | 4791      |
| Heregulin.R.V_GBL11066143               | Heregulin         | NRG1        | Valid                                  | Rabbit | CST               | 2573      |
| HSP70.R.C_GBL11066082                   | HSP70             | HSPA1A      | Use with Caution                       | Rabbit | CST               | 4872      |
| IGFBP2.R.V_GBL11066083                  | IGFBP2            | IGFBP2      | Valid                                  | Rabbit | CST               | 3922      |
| INPP4B.R.V_GBL11066167                  | INPP4b            | INPP4B      | Valid                                  | Rabbit | CST               | 4039      |
| IRS1.R.V_GBL11066132                    | IRS1              | IRS1        | Valid                                  | Rabbit | Millipore         | 06-248    |
| JNK_pT183_pY185.R.V_GBL11066142         | JNK_pT183_Y185    | MAPK8       | Valid                                  | Rabbit | CST               | 4668      |



|                                   |                   |               |                  |        |                     |             |
|-----------------------------------|-------------------|---------------|------------------|--------|---------------------|-------------|
| JNK2.R.C_GBL11066084              | JNK2              | MAPK9         | Use with Caution | Rabbit | CST                 | 4672        |
| Ku80.R.C_GBL11066147              | Ku80              | XRCC5         | Use with Caution | Rabbit | CST                 | 2180        |
| Lck.R.V_GBL11066085               | Lck               | LCK           | Valid            | Rabbit | CST                 | 2752        |
| LKB1.M.E_GBL11066219              | LKB1              | STK11         | Under Evaluation | Mouse  | Abcam               | Ab15095     |
| MAPK_pT202_Y204.R.V_GBL11066086   | MAPK_pT202_Y204   | MAPK1 MAPK3   | Valid            | Rabbit | CST                 | 4377        |
| MEK1.R.V_GBL11066087              | MEK1              | MAP2K1        | Valid            | Rabbit | Epitomics           | 1235-1      |
| MEK1_pS217_S221.R.V_GBL11066169   | MEK1_pS217_S221   | MAP2K1 MAP2K2 | Valid            | Rabbit | CST                 | 9154        |
| MIG.6.M.V_GBL11066261             | MIG6              | ERRF1         | Valid            | Mouse  | Sigma-Aldrich       | WH0054206M1 |
| Mre11.R.C_GBL11066088             | Mre11             | MRE11A        | Use with Caution | Rabbit | CST                 | 4847        |
| MSH2.M.V_GBL11066231              | MSH2              | MSH2          | Valid            | Mouse  | CST                 | 2850        |
| MSH6.R.C_GBL11066165              | MSH6              | MSH6          | Use with Caution | Rabbit | Novus Biologicals   | 22030002    |
| mTOR.R.V_GBL11066089              | mTOR              | MTOR          | Valid            | Rabbit | CST                 | 2983        |
| mTOR_pS2448.R.C_GBL11066090       | mTOR_pS2448       | MTOR          | Use with Caution | Rabbit | CST                 | 2971        |
| MYH11.R.V_GBL11066198             | Myosin-11         | MYH11         | Valid            | Rabbit | Novus Biologicals   | 1139        |
| Myosin.IIa.pS1943.R.V_GBL11066204 | Myosin-IIa_pS1943 | MYH9          | Valid            | Rabbit | CST                 | 5026        |
| N.Cadherin.R.V_GBL11066091        | N-Cadherin        | CDH2          | Valid            | Rabbit | CST                 | 4061        |
| N.Ras.M.V_GBL11066254             | N-Ras             | NRAS          | Valid            | Mouse  | Santa Cruz          | sc-31       |
| NDRG1_pT346.R.V_GBL11066182       | NDRG1_pT346       | NDRG1         | Valid            | Rabbit | CST                 | 3217        |
| NF.kB.p65_pS536.R.C_GBL11066092   | NF-kB-p65_pS536   | RELA          | Use with Caution | Rabbit | CST                 | 3033        |
| NF2.R.C_GBL11066161               | Merlin            | NF2           | Use with Caution | Rabbit | Novus Biologicals   | 1046        |
| Notch1.R.V_GBL11066166            | Notch1            | NOTCH1        | Valid            | Rabbit | CST                 | 3268        |
| P.Cadherin.R.C_GBL11066245        | P-Cadherin        | CDH3          | Use with Caution | Rabbit | CST                 | 2130        |
| p21.R.V_GBL11066064               | p21               | CDKN1A        | Valid            | Rabbit | Santa Cruz          | sc-397      |
| p27.R.V_GBL11066145               | p27-Kip-1         | CDKN1B        | Valid            | Rabbit | Abcam               | ab32034     |
| p27_pT157.R.C_GBL11066137         | p27_pT157         | CDKN1B        | Use with Caution | Rabbit | R&D Systems         | AF1555      |
| p27_pT198.R.V_GBL11066139         | p27_pT198         | CDKN1B        | Valid            | Rabbit | Abcam               | ab64949     |
| p38.R.V_GBL11066093               | p38               | MAPK14        | Valid            | Rabbit | CST                 | 9212        |
| p38_pT180_Y182.R.V_GBL11066094    | p38_pT180_Y182    | MAPK14        | Valid            | Rabbit | CST                 | 9211        |
| p53.R.E_GBL11066244               | p53               | TP53          | Use with Caution | Rabbit | CST                 | 9282        |
| p62.LCK.ligand.M.C_GBL11066267    | p62-LCK-ligand    | SQSTM1        | Use with Caution | Mouse  | BD Transduction Lab | 610833      |
| p70S6K.R.V_GBL11066096            | p70-S6K1          | RPS6KB1       | Valid            | Rabbit | Epitomics           | 1494-1      |
| p70S6K_pT389.R.V_GBL11066097      | p70-S6K_pT389     | RPS6KB1       | Valid            | Rabbit | CST                 | 9205        |
| p90RSK.R.C_GBL11066125            | P90RSK            | RPS6KA1       | Use with Caution | Rabbit | CST                 | 9347        |
| p90RSK_pT359_S363.R.C_GBL11066127 | p90RSK_pT359_S363 | RPS6KA1       | Use with Caution | Rabbit | CST                 | 9344        |

|                                      |                      |                                              |                  |        |                   |             |
|--------------------------------------|----------------------|----------------------------------------------|------------------|--------|-------------------|-------------|
| PAI.1.M.E_GBL11066220                | PAI-1                | SERPINE1                                     | Valid            | Mouse  | BD Biosciences    | 612024      |
| Paxillin.R.C_GBL11066098             | Paxillin             | PXN                                          | Use with Caution | Rabbit | Epitomics         | 1500-1      |
| PCNA.M.C_GBL11066222                 | PCNA                 | PCNA                                         | Use with Caution | Mouse  | Abcam             | ab29        |
| PDCD4.R.C_GBL11066135                | Pdcd4                | PDCD4                                        | Use with Caution | Rabbit | Rockland          | 600-401-965 |
| PDK1.R.V_GBL11066100                 | ATR                  | ATR                                          | Caution          | Rabbit | CST               | 2790        |
| PDK1_pS241.R.V_GBL11066101           | PDK1_pS241           | PDPK1                                        | Valid            | Rabbit | CST               | 3061        |
| PEA15.R.V_GBL11066157                | PEA-15               | PEA15                                        | Valid            | Rabbit | CST               | 2780        |
| PEA15_pS116.R.V_GBL11066158          | PEA-15_pS116         | PEA15                                        | Valid            | Rabbit | Invitrogen        | 44-836G     |
| PI3K.p110.alpha.R.C_GBL11066134      | PI3K-p110-alpha      | PIK3CA                                       | Use with Caution | Rabbit | CST               | 4255        |
| PI3K.p85.R.V_GBL11066102             | PI3K-p85             | PIK3R1                                       | Valid            | Rabbit | Millipore         | 06-195      |
| PKC.alpha.M.V_GBL11066223            | PKC-alpha            | PRKCA                                        | Valid            | Mouse  | Millipore         | 05-154      |
| PKC.alpha_pS657.R.C_GBL11066103      | PKC-alpha_pS657      | PRKCA                                        | Use with Caution | Rabbit | Millipore         | 06-822      |
| PKC.delta_pS664.R.V_GBL11066152      | PKC-delta_pS664      | PRKCD                                        | Valid            | Rabbit | Millipore         | 07-875      |
| PKC.pan_Betall_pS660.R.V_GBL11066196 | PKC-pan_Betall_pS660 | PRKCA, PRKCB<br>PRKCD, PRKCE<br>PRKCH, PRKCC | Valid            | Rabbit | CST               | 9371        |
| PR.R.V_GBL11066104                   | PR                   | PGR                                          | Valid            | Rabbit | Abcam             | ab32085     |
| PRAS40_pT246.R.V_GBL11066123         | PRAS40_pT246         | AKT1S1                                       | Valid            | Rabbit | Life Technologies | 441100G     |
| PRDX1.R.V_GBL11066249                | PRDX1                | PRDX1                                        | Valid            | Rabbit | Sigma             | HPA007730   |
| PREX1.R.E_GBL11066207                | PREX1                | PREX1                                        | Valid            | Rabbit | Abcam             | ab102739    |
| PTEN.R.V_GBL11066106                 | PTEN                 | PTEN                                         | Valid            | Rabbit | CST               | 9552        |
| Rab11.R.E_GBL11066172                | Rab11                | RAB11A RAB11B                                | Under Evaluation | Rabbit | CST               | 3539        |
| Rab25.R.V_GBL11066201                | Rab25                | RAB25                                        | Valid            | Rabbit | CST               | 4314        |
| Rad50.M.V_GBL11066258                | Rad50                | RAD50                                        | Valid            | Mouse  | Millipore         | 05-525      |
| Rad51.R.V_GBL11066210                | Rad51                | RAD51                                        | Valid            | Rabbit | CST               | 8875        |
| Raptor.R.V_GBL11066183               | Raptor               | RPTOR                                        | Valid            | Rabbit | CST               | 2280        |
| Rb.M.QC_GBL11066224                  | Rb                   | RB1                                          | **Used for QC**  | Mouse  | CST               | 9309        |
| Rb_pS807_S811.R.V_GBL11066105        | Rb_pS807_S811        | RB1                                          | Valid            | Rabbit | CST               | 9308        |
| RBM15.R.V_GBL11066197                | RBM15                | RBM15                                        | Valid            | Rabbit | Novus Biologicals | 21390002    |
| Rictor.R.C_GBL11066184               | Rictor               | RICTOR                                       | Use with Caution | Rabbit | CST               | 2114        |
| Rictor_pT1135.R.V_GBL11066195        | Rictor_pT1135        | RICTOR                                       | Valid            | Rabbit | CST               | 3806        |
| S6.R.E_GBL11066108                   | S6                   | RPS6                                         | Under Evaluation | Rabbit | CST               | 2217        |
| S6_pS235_S236.R.V_GBL11066109        | S6_pS235_S236        | RPS6                                         | Valid            | Rabbit | CST               | 2211        |
| S6_pS240_S244.R.V_GBL11066110        | S6_pS240_S244        | RPS6                                         | Valid            | Rabbit | CST               | 2215        |
| SCD1.M.V_GBL11066253                 | SCD                  | SCD                                          | Valid            | Mouse  | Santa Cruz        | sc-58420    |

|                                  |                                                                                                                    |                                |                  |        |                   |           |
|----------------------------------|--------------------------------------------------------------------------------------------------------------------|--------------------------------|------------------|--------|-------------------|-----------|
| SF2.M.V_GBL11066263              | SF2                                                                                                                | SRSF1                          | Valid            | Mouse  | Invitrogen        | 32-4500   |
| Shc_pY317.R.E_GBL11066159        | Shc_pY317                                                                                                          | SHC1                           | Valid            | Rabbit | CST               | 2431      |
| Smad1.R.V_GBL11066150            | Smad1                                                                                                              | SMAD1                          | Valid            | Rabbit | Epitomics         | 1649-1    |
| Smad3.R.V_GBL11066131            | Smad3                                                                                                              | SMAD3                          | Valid            | Rabbit | Abcam             | ab40854   |
| Smad4.M.V_GBL11066234            | Smad4                                                                                                              | SMAD4                          | Valid            | Mouse  | Santa Cruz        | sc-7966   |
| Src.M.V_GBL11066227              | Src                                                                                                                | SRC                            | Valid            | Mouse  | Millipore         | 05-184    |
| Src_pY416.R.C_GBL11066111        | Src_pY416                                                                                                          | SRC LYN<br>FYN LCK<br>YES1 HCK | Use with Caution | Rabbit | CST               | 2101      |
| Src_pY527.R.V_GBL11066112        | Src_pY527                                                                                                          | SRC YES1<br>FYN FGR            | Valid            | Rabbit | CST               | 2105      |
| STAT3_pY705.R.V_GBL11066113      | Stat3_pY705                                                                                                        | STAT3                          | Valid            | Rabbit | CST               | 9131      |
| STAT5.alpha.R.V_GBL11066114      | Stat5a                                                                                                             | STAT5A                         | Valid            | Rabbit | Abcam             | ab32043   |
| Stathmin.R.V_GBL11066119         | Stathmin-1                                                                                                         | STMN1                          | Valid            | Rabbit | Abcam             | ab52630   |
| Syk.M.V_GBL11066259              | Syk                                                                                                                | SYK                            | Valid            | Mouse  | Santa Cruz        | sc-1240   |
| TAZ.R.V_GBL11066128              | TAZ                                                                                                                | WWTR1                          | Valid            | Rabbit | CST               | 2149      |
| TFRC.R.V_GBL11066199             | TFRC                                                                                                               | TFRC                           | Valid            | Rabbit | Novus Biologicals | 22500002  |
| TIGAR.R.V_GBL11066176            | TIGAR                                                                                                              | C12ORF5                        | Valid            | Rabbit | Abcam             | ab137573  |
| Transglutaminase.M.V_GBL11066232 | Transglutaminase                                                                                                   | TGM2                           | Valid            | Mouse  | Lab Vision        | MS-224-P1 |
| TSC1.R.C_GBL11066181             | TSC1                                                                                                               | TSC1                           | Use with Caution | Rabbit | CST               | 4906      |
| TTF1.R.V_GBL11066170             | TTF1                                                                                                               | NKX2-1                         | Valid            | Rabbit | Abcam             | ab76013   |
| Tuberin.R.E_GBL11066115          | Tuberin                                                                                                            | TSC2                           | Valid            | Rabbit | Epitomics         | 1613-1    |
| Tuberin_pT1462.R.V_GBL11066116   | Tuberin_pT1462                                                                                                     | TSC2                           | Valid            | Rabbit | CST               | 3617      |
| VEGFR2.R.V_GBL11066117           | VEGFR-2                                                                                                            | KDR                            | Valid            | Rabbit | CST               | 2479      |
| VHL.M.C_GBL11066228              | EPPK1 (This antibody actually recognizes & binds to EPPK1, validated by MS, siRNA & correlation to RNA expression) | EPPK1                          | Use with Caution | Mouse  | BD Pharmingen     | 556347    |
| X4E.BP1_pT70.R.V_GBL11066048     | 4EBP1_pT70                                                                                                         | EIF4EBP1                       | Valid            | Rabbit | CST               | 9455      |
| XBP1.G.C_GBL11066242             | XBP1                                                                                                               | XBP1                           | Use with Caution | Goat   | Santa Cruz        | sc-32136  |
| XRCC1.R.E_GBL11066148            | XRCC1                                                                                                              | XRCC1                          | Use with Caution | Rabbit | CST               | 2735      |
| YAP.R.E_GBL11066129              | YAP                                                                                                                | YAP1                           | Under Evaluation | Rabbit | Santa Cruz        | sc-15407  |
| YAP_pS127.R.E_GBL11066130        | YAP_pS127                                                                                                          | YAP1                           | Under Evaluation | Rabbit | CST               | 4911      |
| YB.1.R.V_GBL11066118             | YB1                                                                                                                | YBX1                           | Valid            | Rabbit | Novus Biologicals | 17250002  |
| YB.1_pS102.R.V_GBL11066136       | YB1_pS102                                                                                                          | YBX1                           | Valid            | Rabbit | CST               | 2900      |

## Pathway Analysis Methods

### *In-silico* Ingenuity-based pathway analysis

Pathway Analysis was performed on the mRNA expression data comparing the 60 Type2 PRCC tumors with the 75 Type 1 PRCC tumors. The genes that were on average up-regulated by 2-fold or greater in Type 2 PRCC compared Type 1 PRCC with a t-test p-value < 0.000001 were selected to represent a stringent, statistically significant gene list (n=353). This gene list was analyzed using the Ingenuity Systems Interactive pathway analysis of complex 'omics data software (IPA - <http://www.ingenuity.com/>) using the core analysis workflow. This provided data on the statistical enrichment of genes associated with disease or molecular and cellular function or a known canonical pathway.

### Metabolic pathway analysis

The mRNA expression data was extracted for a specific list of genes associated with several metabolic pathways, including glycolysis, the Krebs cycle and the AMPK complex, that are listed in the following table. This data was used to perform unsupervised clustering of the 161 PRCC tumors. The CIMP PRCC tumors produced a specific cluster and further clustering was performed using selected genes that demonstrated strong differential expression (highlighted in gray within the following table) and only assessing the Type 2 PRCC tumors to demonstrate that the CIMP PRCC still represented a specific cluster.

Hierarchical cluster analysis was performed based on Euclidean distance using the Gene Cluster 3.0 software (<http://bonsai.hgc.jp/~mdehoon/software/cluster/software.htm>) and visualized using java TreeView 3.0 (<http://jtreeview.sourceforge.net/>).

| <b>Metabolic Function</b> | <b>Gene Name</b> | <b>Entrez No.</b> | <b>Full Gene name</b>                                 |
|---------------------------|------------------|-------------------|-------------------------------------------------------|
| Glycolysis                | <i>HK1</i>       | 3098              | hexokinase 1                                          |
| Glycolysis                | <i>HK2</i>       | 3099              | hexokinase 2                                          |
| Glycolysis                | <i>HK3</i>       | 3101              | hexokinase 3 (white cell)                             |
| Glycolysis                | <i>GPI</i>       | 2821              | glucose phosphate isomerase                           |
| Glycolysis                | <i>PFKFB1</i>    | 5207              | 6-phosphofructo-2-kinase/fructose-2,6-biphosphatase 1 |
| Glycolysis                | <i>PFKFB2</i>    | 5208              | 6-phosphofructo-2-kinase/fructose-2,6-biphosphatase 2 |
| Glycolysis                | <i>PFKFB3</i>    | 5209              | 6-phosphofructo-2-kinase/fructose-2,6-biphosphatase 3 |
| Glycolysis                | <i>PFKFB4</i>    | 5210              | 6-phosphofructo-2-kinase/fructose-2,6-biphosphatase 4 |
| Glycolysis                | <i>PFKL</i>      | 5211              | phosphofructokinase, liver                            |
| Glycolysis                | <i>PFKM</i>      | 5213              | phosphofructokinase, muscle                           |
| Glycolysis                | <i>PFKP</i>      | 5214              | phosphofructokinase, platelet                         |
| Glycolysis                | <i>ALDOA</i>     | 226               | aldolase A, fructose-bisphosphate                     |
| Glycolysis                | <i>ALDOB</i>     | 229               | aldolase B, fructose-bisphosphate                     |
| Glycolysis                | <i>ALDOC</i>     | 230               | aldolase C, fructose-bisphosphate                     |
| Glycolysis                | <i>TPI1</i>      | 7167              | triosephosphate isomerase 1                           |
| Glycolysis                | <i>GAPDH</i>     | 2597              | glyceraldehyde-3-phosphate dehydrogenase              |
| Glycolysis                | <i>PGK1</i>      | 5230              | phosphoglycerate kinase 1                             |
| Glycolysis                | <i>PGK2</i>      | 5232              | phosphoglycerate kinase 2                             |
| Glycolysis                | <i>PGAM1</i>     | 5223              | phosphoglycerate mutase 1 (brain)                     |
| Glycolysis                | <i>PGAM2</i>     | 5224              | phosphoglycerate mutase 2 (muscle)                    |
| Glycolysis                | <i>PGAM4</i>     | 441531            | phosphoglycerate mutase family member 4               |
| Glycolysis                | <i>PGAM5</i>     | 192111            | phosphoglycerate mutase family member 5               |
| Glycolysis                | <i>ENO1</i>      | 2023              | enolase 1, (alpha)                                    |
| Glycolysis                | <i>ENO2</i>      | 2026              | enolase 2 (gamma, neuronal)                           |
| Glycolysis                | <i>ENO3</i>      | 2027              | enolase 3 (beta, muscle)                              |
| Glycolysis                | <i>ENOPH1</i>    | 58478             | enolase-phosphatase 1                                 |
| Glycolysis                | <i>ENOSF1</i>    | 55556             | enolase superfamily member 1                          |
| Glycolysis                | <i>PKLR</i>      | 5313              | pyruvate kinase, liver and RBC                        |
| Glycolysis                | <i>PKM2</i>      | 5315              | pyruvate kinase, muscle                               |
| Glycolysis                | <i>LDHA</i>      | 3939              | lactate dehydrogenase A                               |
| Glycolysis                | <i>LDHB</i>      | 3945              | lactate dehydrogenase B                               |
| Glycolysis                | <i>LDHC</i>      | 3948              | lactate dehydrogenase C                               |
| Glycolysis                | <i>LDHD</i>      | 197257            | lactate dehydrogenase D                               |

|                         |               |        |                                                                       |
|-------------------------|---------------|--------|-----------------------------------------------------------------------|
| Pyruvate Metabolism     | <i>PDK1</i>   | 5163   | pyruvate dehydrogenase kinase, isozyme 1                              |
| Pyruvate Metabolism     | <i>PDK2</i>   | 5164   | pyruvate dehydrogenase kinase, isozyme 2                              |
| Pyruvate Metabolism     | <i>PDK3</i>   | 5165   | pyruvate dehydrogenase kinase, isozyme 3                              |
| Pyruvate Metabolism     | <i>PDK4</i>   | 5166   | pyruvate dehydrogenase kinase, isozyme 4                              |
| Pyruvate Metabolism     | <i>PDP1</i>   | 54704  | pyruvate dehydrogenase phosphatase catalytic subunit 1                |
| Pyruvate Metabolism     | <i>PDP2</i>   | 57546  | pyruvate dehydrogenase phosphatase catalytic subunit 2                |
| Pyruvate Metabolism     | <i>PDPR</i>   | 55066  | pyruvate dehydrogenase phosphatase regulatory subunit                 |
| Krebs Cycle             | <i>CS</i>     | 1431   | citrate synthase                                                      |
| Krebs Cycle             | <i>ACO1</i>   | 48     | aconitase 1, soluble                                                  |
| Krebs Cycle             | <i>ACO2</i>   | 50     | aconitase 2, mitochondrial                                            |
| Krebs Cycle             | <i>IDH1</i>   | 3417   | isocitrate dehydrogenase 1 (NADP+), soluble                           |
| Krebs Cycle             | <i>IDH2</i>   | 3418   | isocitrate dehydrogenase 2 (NADP+), mitochondrial                     |
| Krebs Cycle             | <i>OGDH</i>   | 4967   | oxoglutarate (alpha-ketoglutarate) dehydrogenase (lipoamide)          |
| Krebs Cycle             | <i>SUCLA2</i> | 8803   | succinate-CoA ligase, ADP-forming, beta subunit                       |
| Krebs Cycle             | <i>SUCLG1</i> | 8802   | succinate-CoA ligase, alpha subunit                                   |
| Krebs Cycle             | <i>SUCLG2</i> | 8801   | succinate-CoA ligase, GDP-forming, beta subunit                       |
| Krebs Cycle             | <i>SDHAF1</i> | 644096 | succinate dehydrogenase complex assembly factor 1                     |
| Krebs Cycle             | <i>SDHAF2</i> | 54949  | succinate dehydrogenase complex assembly factor 2                     |
| Krebs Cycle             | <i>SDHA</i>   | 6389   | succinate dehydrogenase complex, subunit A, flavoprotein (Fp)         |
| Krebs Cycle             | <i>SDHB</i>   | 6390   | succinate dehydrogenase complex, subunit B, iron sulfur (Ip)          |
| Krebs Cycle             | <i>SDHC</i>   | 6391   | succinate dehydrogenase complex, subunit C, integral membrane protein |
| Krebs Cycle             | <i>SDHD</i>   | 6392   | succinate dehydrogenase complex, subunit D, integral membrane protein |
| Krebs Cycle             | <i>FH</i>     | 2271   | fumarate hydratase                                                    |
| Krebs Cycle             | <i>MDH1</i>   | 4190   | malate dehydrogenase 1, NAD (soluble)                                 |
| Krebs Cycle             | <i>MDH2</i>   | 4191   | malate dehydrogenase 2, NAD (mitochondrial)                           |
| Krebs Cycle             | <i>ME1</i>    | 4199   | malic enzyme 1, NADP(+)-dependent, cytosolic                          |
| Krebs Cycle             | <i>ME2</i>    | 4200   | malic enzyme 2, NAD(+)-dependent, mitochondrial                       |
| Krebs Cycle             | <i>ME3</i>    | 10873  | malic enzyme 3, NADP(+)-dependent, mitochondrial                      |
| Krebs Cycle             | <i>PC</i>     | 5091   | pyruvate carboxylase                                                  |
| Krebs Cycle             | <i>GOT1</i>   | 2805   | glutamic-oxaloacetic transaminase 1, soluble                          |
| Krebs Cycle             | <i>GOT2</i>   | 2806   | glutamic-oxaloacetic transaminase 2, mitochondrial                    |
| Krebs Cycle             | <i>NNT</i>    | 23530  | nicotinamide nucleotide transhydrogenase                              |
| Ribose Sugar Metabolism | <i>TKTL1</i>  | 8277   | transketolase-like 1                                                  |
| Ribose Sugar Metabolism | <i>TKTL2</i>  | 84076  | transketolase-like 2                                                  |

|                         |               |       |                                                                    |
|-------------------------|---------------|-------|--------------------------------------------------------------------|
| Ribose Sugar Metabolism | <i>TKT</i>    | 7086  | transketolase                                                      |
| Ribose Sugar Metabolism | <i>TALDO1</i> | 6888  | transaldolase 1                                                    |
| Ribose Sugar Metabolism | <i>G6PD</i>   | 2539  | glucose-6-phosphate dehydrogenase                                  |
| Ribose Sugar Metabolism | <i>PGD</i>    | 5226  | phosphogluconate dehydrogenase                                     |
| Ribose Sugar Metabolism | <i>PGLS</i>   | 25796 | 6-phosphogluconolactonase                                          |
| Ribose Sugar Metabolism | <i>RPIA</i>   | 22934 | ribose 5-phosphate isomerase A                                     |
| Ribose Sugar Metabolism | <i>RPE</i>    | 6120  | ribulose-5-phosphate-3-epimerase                                   |
| AMPK Complex            | <i>PRKAA1</i> | 5562  | protein kinase, AMP-activated, alpha 1 catalytic subunit           |
| AMPK Complex            | <i>PRKAA2</i> | 5563  | protein kinase, AMP-activated, alpha 2 catalytic subunit           |
| AMPK Complex            | <i>PRKAB1</i> | 5564  | protein kinase, AMP-activated, beta 1 non-catalytic subunit        |
| AMPK Complex            | <i>PRKAB2</i> | 5565  | protein kinase, AMP-activated, beta 2 non-catalytic subunit        |
| AMPK Complex            | <i>PRKAG1</i> | 5571  | protein kinase, AMP-activated, gamma 1 non-catalytic subunit       |
| AMPK Complex            | <i>PRKAG2</i> | 51422 | protein kinase, AMP-activated, gamma 2 non-catalytic subunit       |
| AMPK Complex            | <i>PRKAG3</i> | 53632 | protein kinase, AMP-activated, gamma 3 non-catalytic subunit       |
| Fatty Acid Synthesis    | <i>ACACA</i>  | 31    | acetyl-CoA carboxylase alpha                                       |
| Fatty Acid Synthesis    | <i>ACACB</i>  | 32    | acetyl-CoA carboxylase beta                                        |
| Fatty Acid Synthesis    | <i>ACLY</i>   | 47    | ATP citrate lyase                                                  |
| Fatty Acid Synthesis    | <i>FASN</i>   | 2194  | fatty acid synthase                                                |
| Fatty Acid Synthesis    | <i>SLC1A5</i> | 6510  | solute carrier family 1 (neutral amino acid transporter), member 5 |

## Batch Effect Analysis Methods

### Assessment of batch effects

We used hierarchical clustering and Principal Components Analysis (PCA) to assess batch effects in the papillary renal cell carcinoma data sets. Five different data sets were analyzed: miRNA sequencing (Illumina HiSeq), DNA methylation (Infinium HM450 microarray), mRNA sequencing (Illumina HiSeq), copy number variations (GW SNP 6), and protein expression (RPPA). All of the data sets were at TCGA level 3, since that's the level at which most of the analyses in the paper are based. We assessed batch effects with respect to two variables; batch ID and Tissue Source Site (TSS). Detailed results and batch effects analysis of other TCGA data sets can be found at: <http://bioinformatics.mdanderson.org/tcgabatcheffects>

For hierarchical clustering, we used the average linkage algorithm with 1 minus the Pearson correlation coefficient as the dissimilarity measure. We clustered the samples and then annotated them with colored bars at the bottom. Each color corresponded to a batch ID or a TSS. For PCA, we plotted the first four principal components, but only plots of the first two components are shown here. To make it easier to assess batch effects, we enhanced the traditional PCA plot with centroids. Points representing samples with the same batch ID (or TSS) were connected to the batch centroid by lines. The centroids were computed by taking the mean across all samples in the batch. That procedure produced a visual representation of the relationships among batch centroids in relation to the scatter within batches. The results for all five data sets are shown in supplementary figure S21.



## Supplementary Figures S1-S21

|            |                                                                                                                      |           |
|------------|----------------------------------------------------------------------------------------------------------------------|-----------|
| <b>S1</b>  | <b>Type and Tumor Stage Analysis of the 161 Papillary Renal Cell Carcinoma (PRCC) Tumors in the TCGA KIRP Cohort</b> | <b>33</b> |
| <b>S2</b>  | <b>Type, Tumor Stage and Survival Analysis of the 161 PRCC Tumors dependent upon Copy Number Cluster Analysis</b>    | <b>34</b> |
| <b>S3</b>  | <b>Expression Analysis of <i>TFE3</i> Target Genes</b>                                                               | <b>35</b> |
| <b>S4</b>  | <b>Expression Analysis of <i>TFEB</i> and a Known Target Gene</b>                                                    | <b>36</b> |
| <b>S5</b>  | <b>Novel RNA transcript variant of <i>MET</i> and Expression of the <i>MET</i> gene</b>                              | <b>37</b> |
| <b>S6</b>  | <b>GISTIC2.0 Analysis of Focal Copy-Number Alteration</b>                                                            | <b>38</b> |
| <b>S7</b>  | <b><i>CDKN2A</i> Alterations in PRCC</b>                                                                             | <b>39</b> |
| <b>S8</b>  | <b>Assessment of <i>CDKN2A</i> Targeting microRNAs (miRs)</b>                                                        | <b>40</b> |
| <b>S9</b>  | <b>Oncoprint of the Chromosome 3p-Encoded Chromatin Remodeling Tumor Suppressor Genes</b>                            | <b>42</b> |
| <b>S10</b> | <b>Metabolic Analysis of the CIMP Associated PRCC tumors</b>                                                         | <b>43</b> |
| <b>S11</b> | <b>mRNA Expression Analysis in 161 Papillary Renal Cell Carcinomas</b>                                               | <b>44</b> |
| <b>S12</b> | <b>Unsupervised NMF Consensus Clustering of miR-Seq Sata for 161 PRCC Tumor Samples</b>                              | <b>45</b> |
| <b>S13</b> | <b>Clustering of papillary RCC tumors based on RPPA data reveals distinct subtypes</b>                               | <b>47</b> |
| <b>S14</b> | <b>Multi-platform-based Cluster of Cluster Analysis (COCA) in PRCC</b>                                               | <b>48</b> |
| <b>S15</b> | <b>Differentially abundant miRs.</b>                                                                                 | <b>49</b> |
| <b>S16</b> | <b>Somatic copy number alterations (sCNA) and miRNAs.</b>                                                            | <b>51</b> |
| <b>S17</b> | <b>mRNA Pathway Analysis Comparing Type 2 PRCC to Type 1 PRCC</b>                                                    | <b>53</b> |
| <b>S18</b> | <b>Survival Analysis of the NRF2-ARE Pathway and its Critical Marker Gene, <i>NQO1</i></b>                           | <b>54</b> |
| <b>S19</b> | <b>Candidate Driver Mutations and HotNet2 Network analysis of PRCCs</b>                                              | <b>55</b> |
| <b>S20</b> | <b><i>MET</i> Expression Dependent Upon PRCC Histological Type and <i>MET</i> Copy-Number</b>                        | <b>57</b> |
| <b>S21</b> | <b>Batch Effect Analysis for 161 PRCCs in the KIRP Cohort</b>                                                        | <b>58</b> |

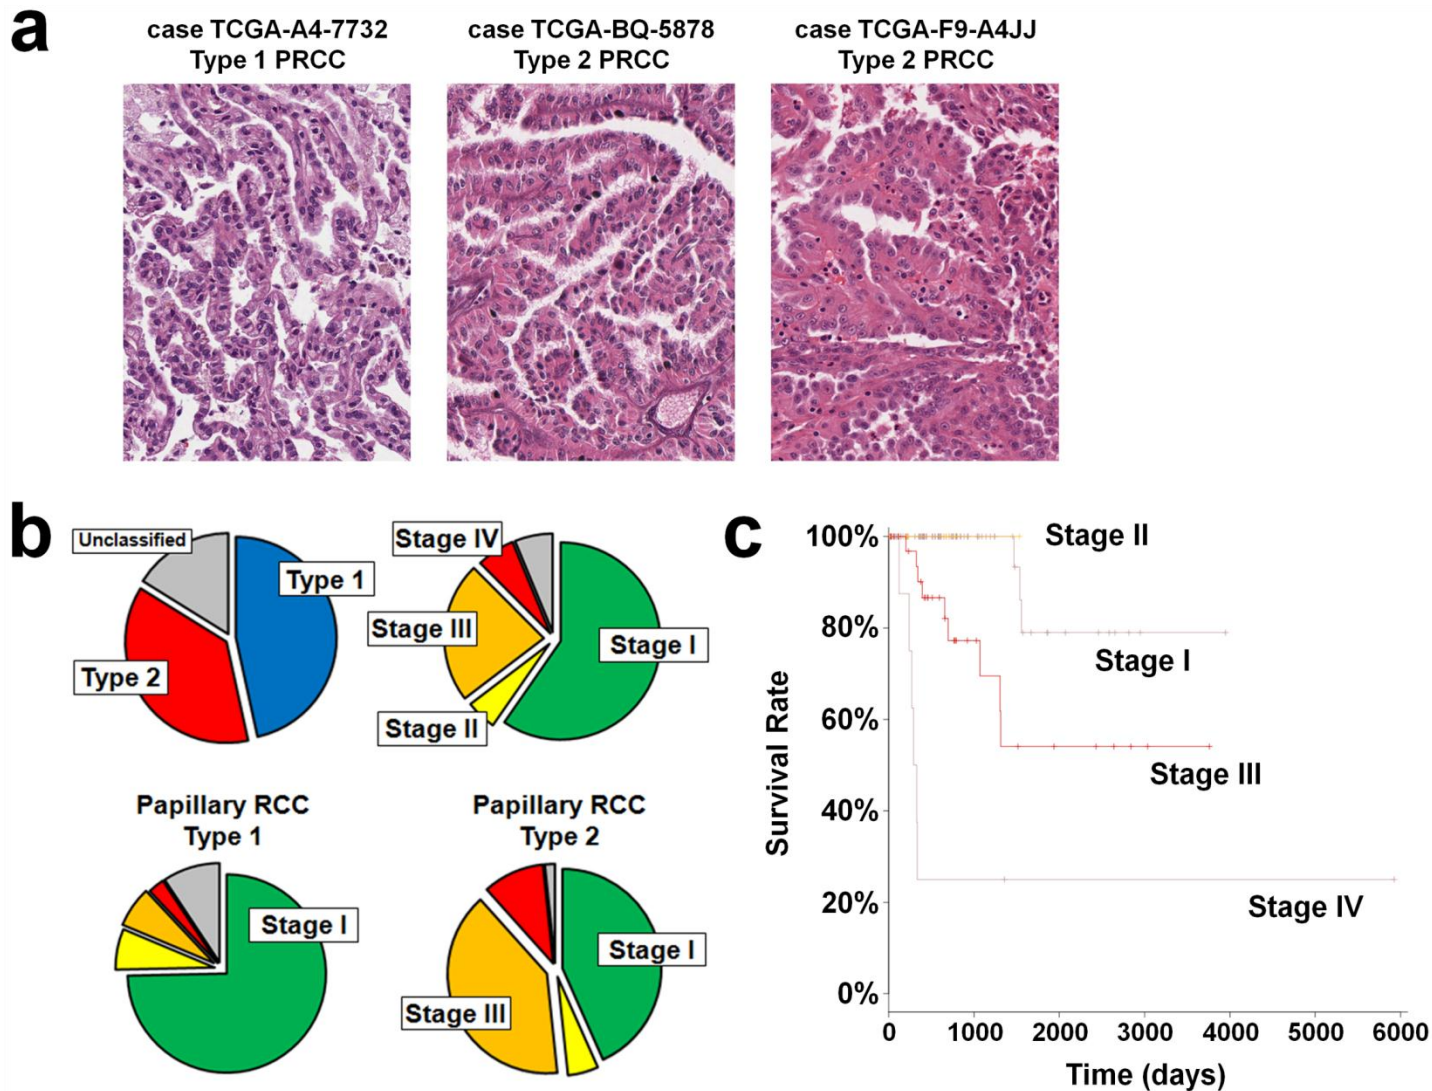

**Figure S1: Type and Tumor Stage Analysis of the 161 Papillary Renal Cell Carcinoma (PRCC) Tumors in the TCGA KIRP Cohort**

- (a) Representative histological sections of Type 1 and Type 2 PRCC cases, with Type 2 showing more heterogeneity at the level of histopathology.
- (b) The breakdown of PRCC type and tumor stage for all the tumors within the cohort and the tumor stage breakdown for PRCC Type 1 and Type 2 tumors alone.
- (c) Kaplan-Meier survival analysis for the 161 PRCC tumors dependent upon tumor stage.

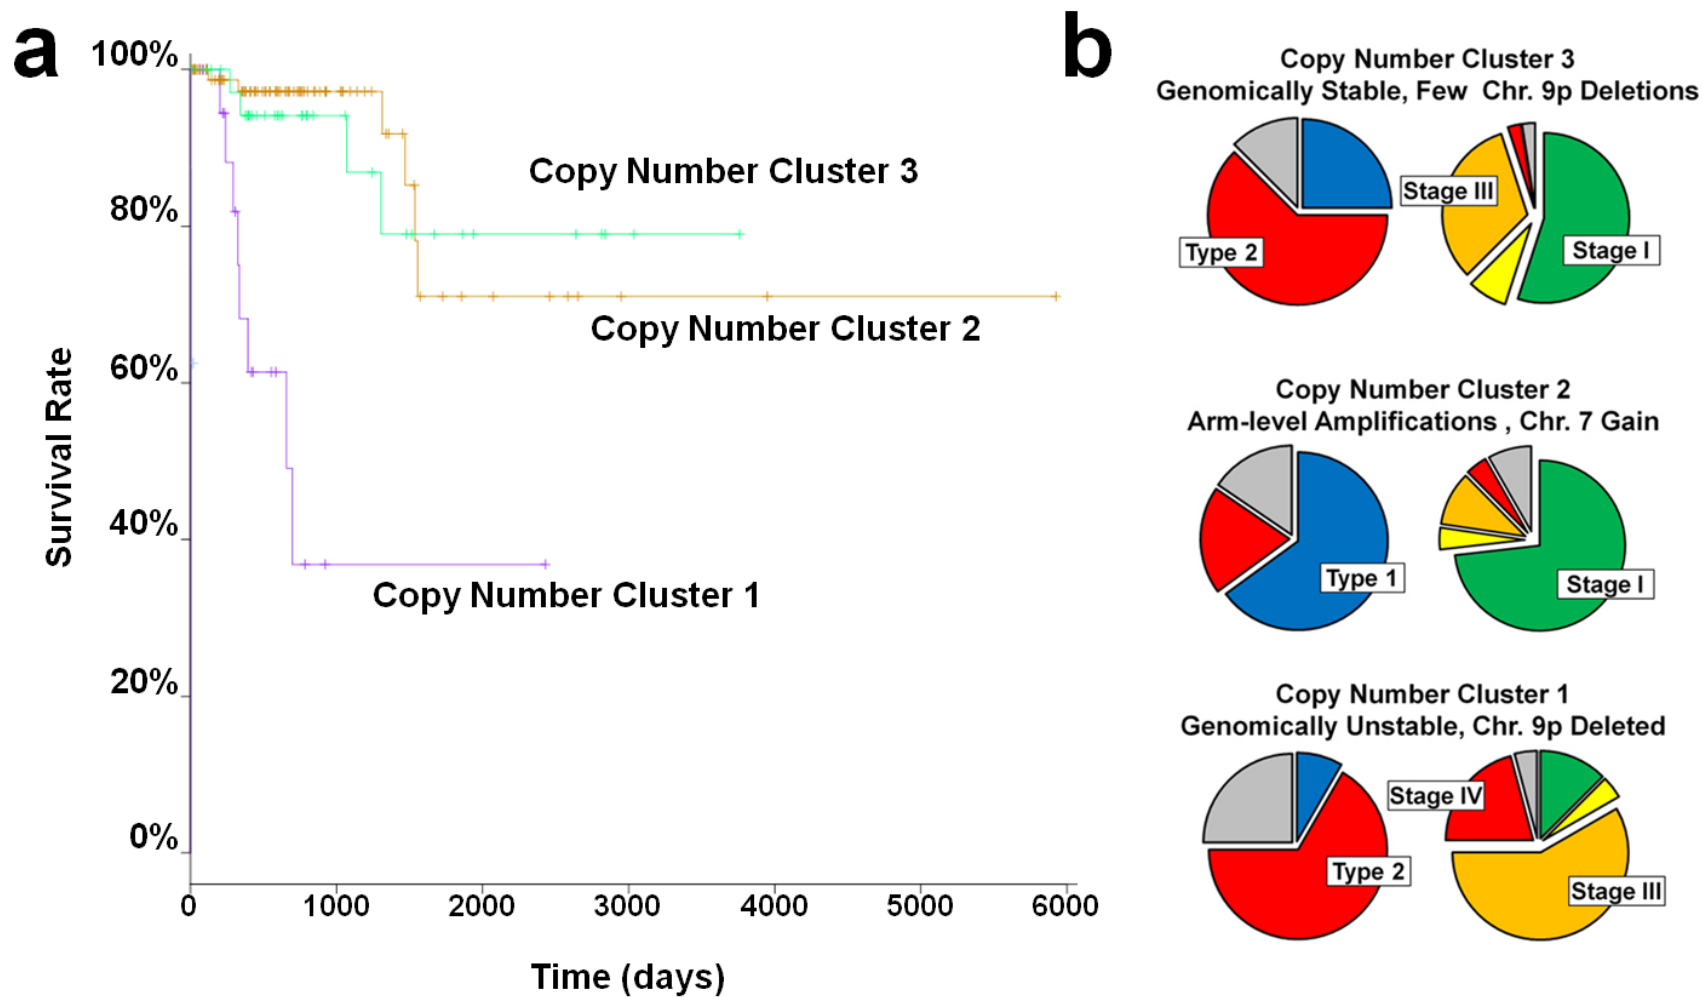

**Figure S2: Type, Tumor Stage and Survival Analysis of the 161 PRCC Tumors dependent upon Copy Number Cluster Analysis**

- (a) Kaplan-Meier survival analysis for the 161 PRCC tumors dependent upon the copy number clusters.
- (b) The breakdown of PRCC type and tumor stage for each of the copy number clusters generated from the SNP-array based profiling of somatic copy number alterations (SCNAs).

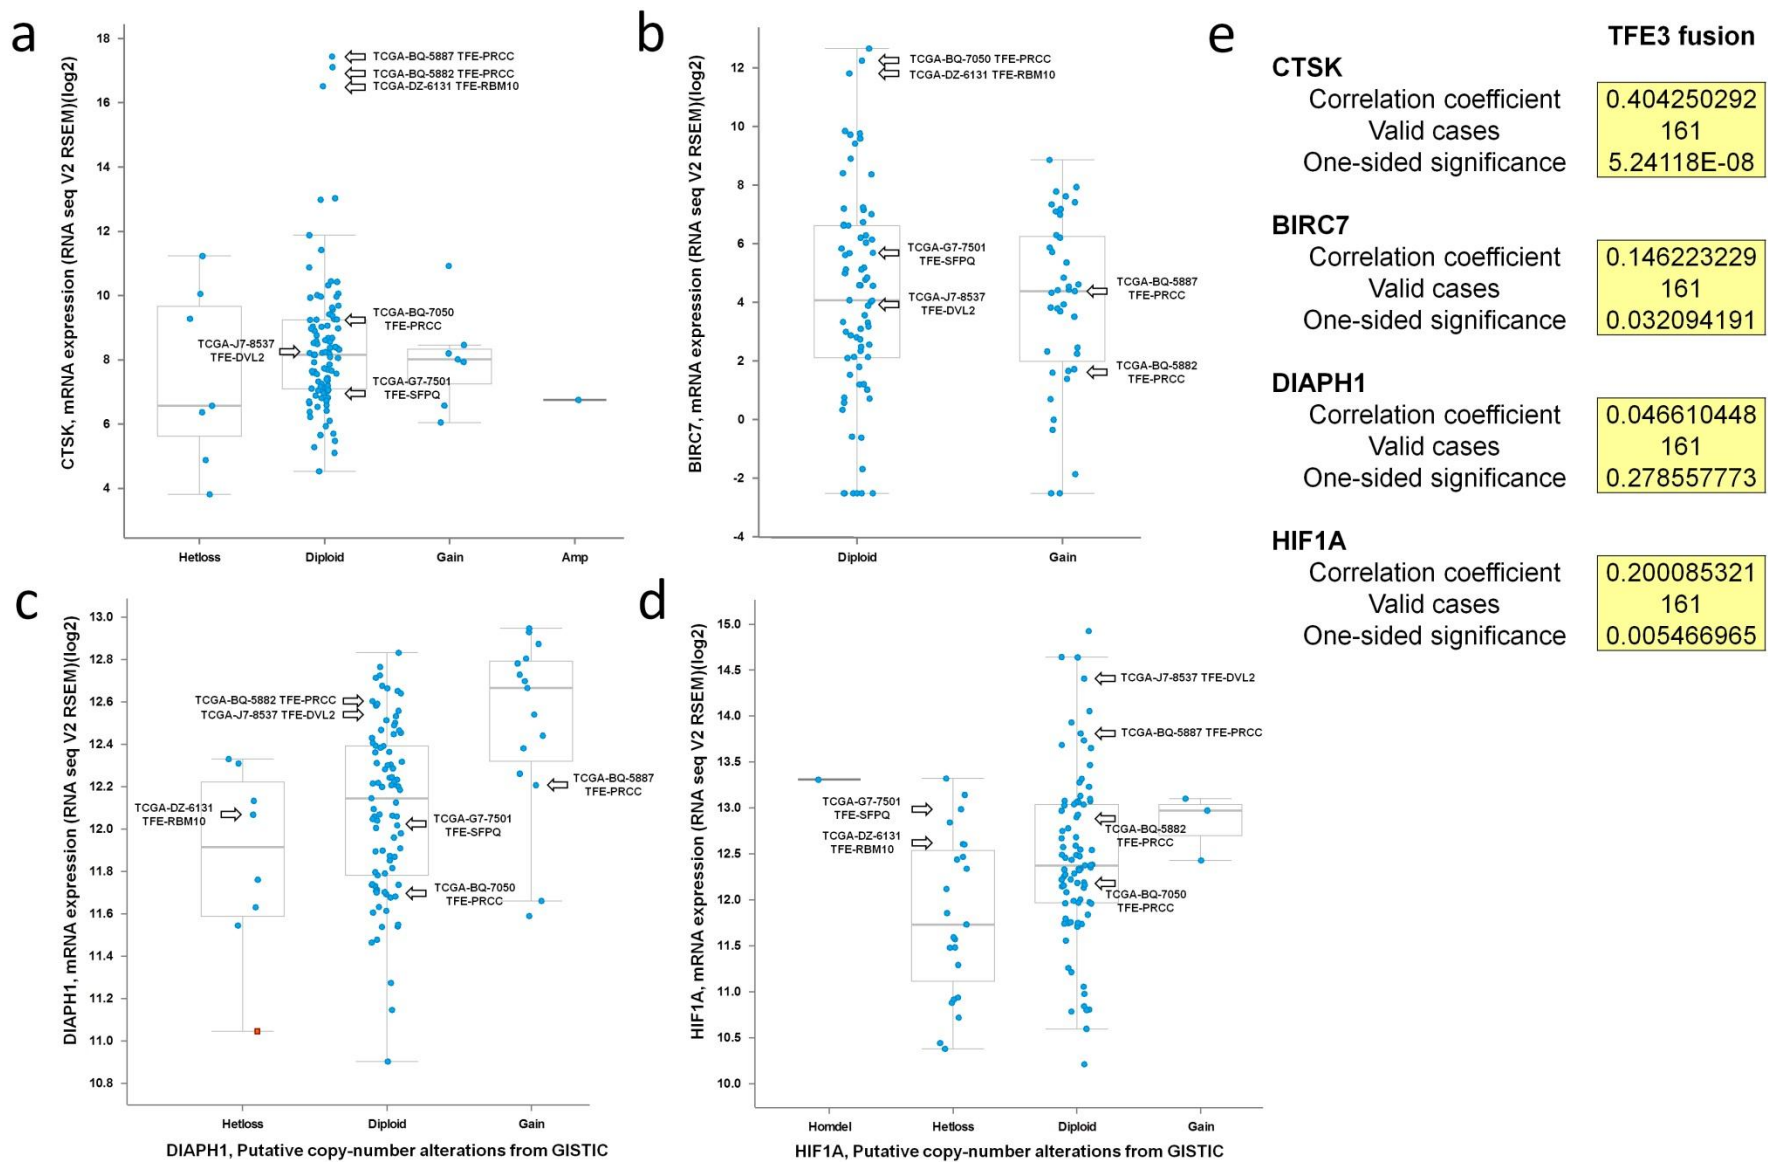

**Figure S3: Expression Analysis of *TFE3* Target Genes**

Expression analysis of known target genes for the *TFE3* transcription factor was performed using the RNA-Seq data and combined with putative copy-number alteration provided by GISTIC. The target genes assessed were (a) *CTSK*, (b) *BRIC7*, (c) *DIAPH1*, and (d) *HIF1A*. The arrows designate the expression markers for the individual *TFE3*-fusion tumors. The correlation between the presence of the *TFE3* fusions and increased mRNA expression were calculated for each gene (e).

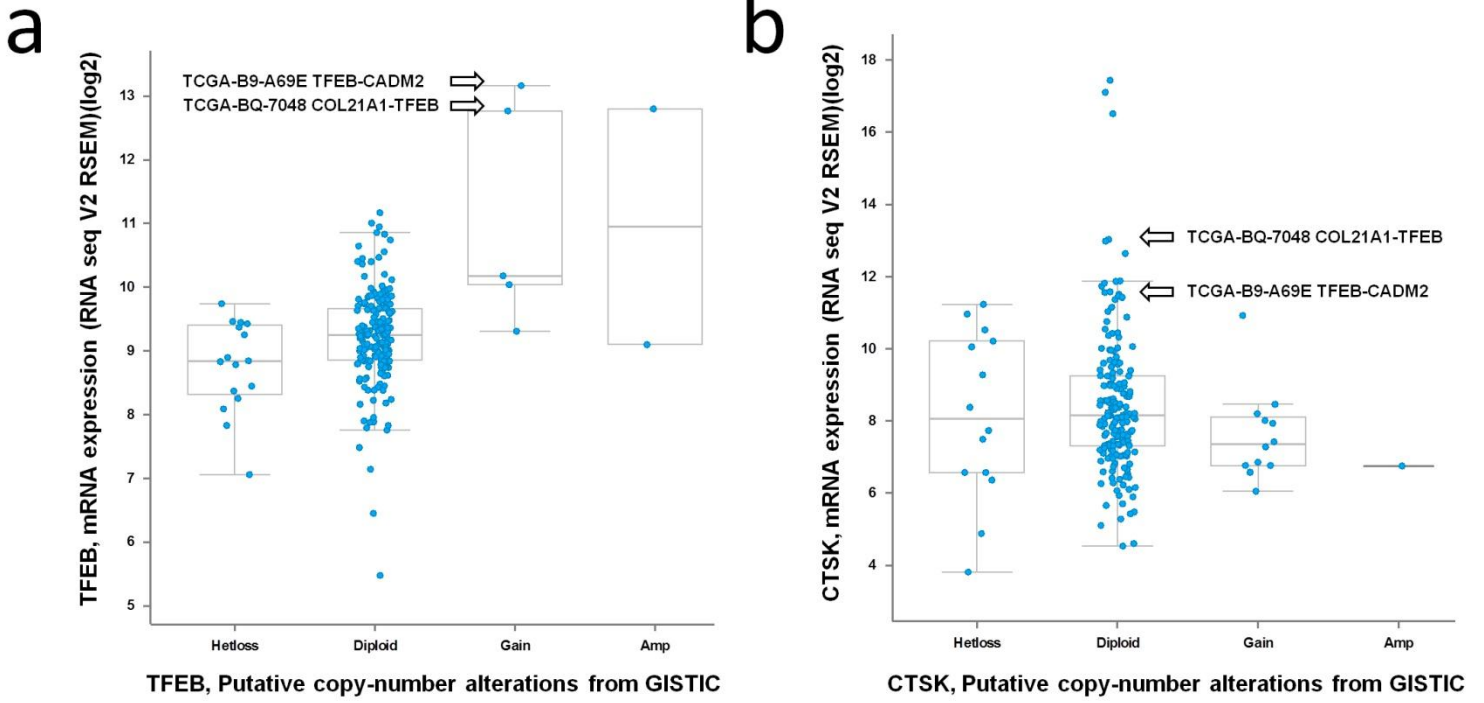

**Figure S4: Expression Analysis of *TFEB* and a Known Target Gene**

Expression analysis for **(a)** the transcription factor *TFEB* and its known target gene, **(b)** *CTSK*, was performed using the RNA-Seq data and combined with putative copy-number alteration provided by GISTIC. The arrows designate the expression markers for the individual *TFEB*-fusion tumors.

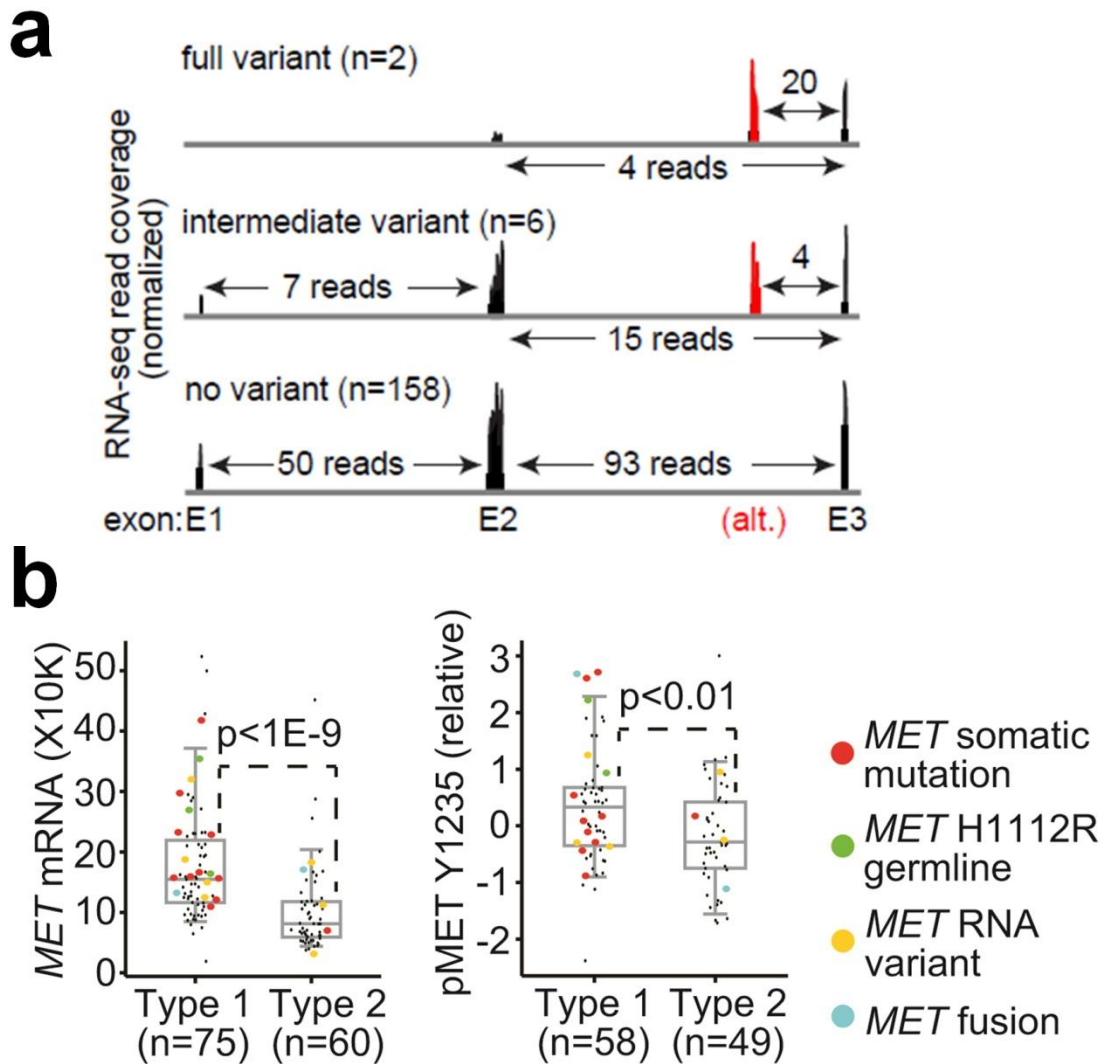

**Figure S5: Novel RNA transcript variant of *MET* and Expression of the *MET* gene**

- (a) Novel RNA transcript variant of *MET* lacking the canonical exons 1 and 2 but containing a novel exon 1 that splices to the canonical exon 3. This variant is represented in the majority of transcripts in two PRCC cases and in a fraction of the transcripts in six other PRCC cases. Numbers of sequence reads spanning the given exon junctions are indicated.
- (b) Differential expression of *MET* mRNA RPKM levels (left) and phospho-Met (pY1235) levels (right), between Type 1 and Type 2 PRCC. Cases harboring mutation or RNA transcript variant for *MET* are indicated. P-values by t-test on log-transformed data.

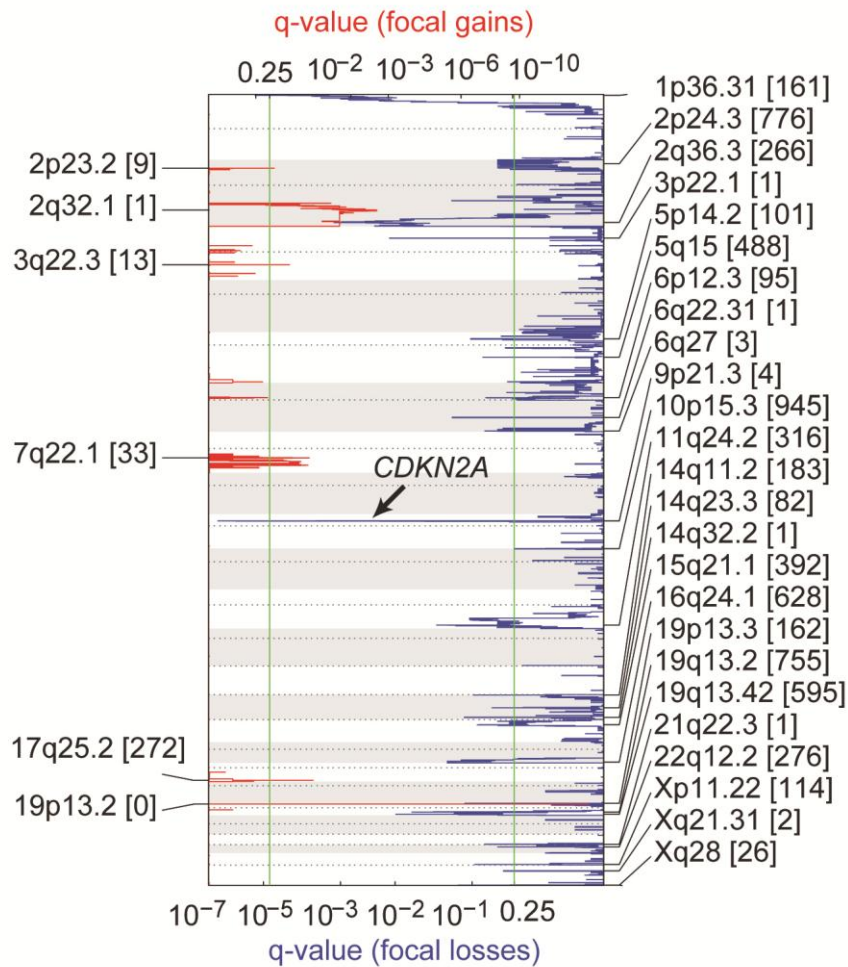

**Figure S6: GISTIC2.0 Analysis of Focal Copy-Number Alteration**

GISTIC2.0 analysis of focal copy-number alteration was performed on the 161 PRCCs and demonstrated both deletions and amplifications. The regions of deletion or amplification are designated with their chromosomal cytogenetic band and the number of genes within each region is shown within square-brackets. Two significant deletions were observed at 1p36.31 and 9p21.3 that contained 136 genes and 4 genes respectively.

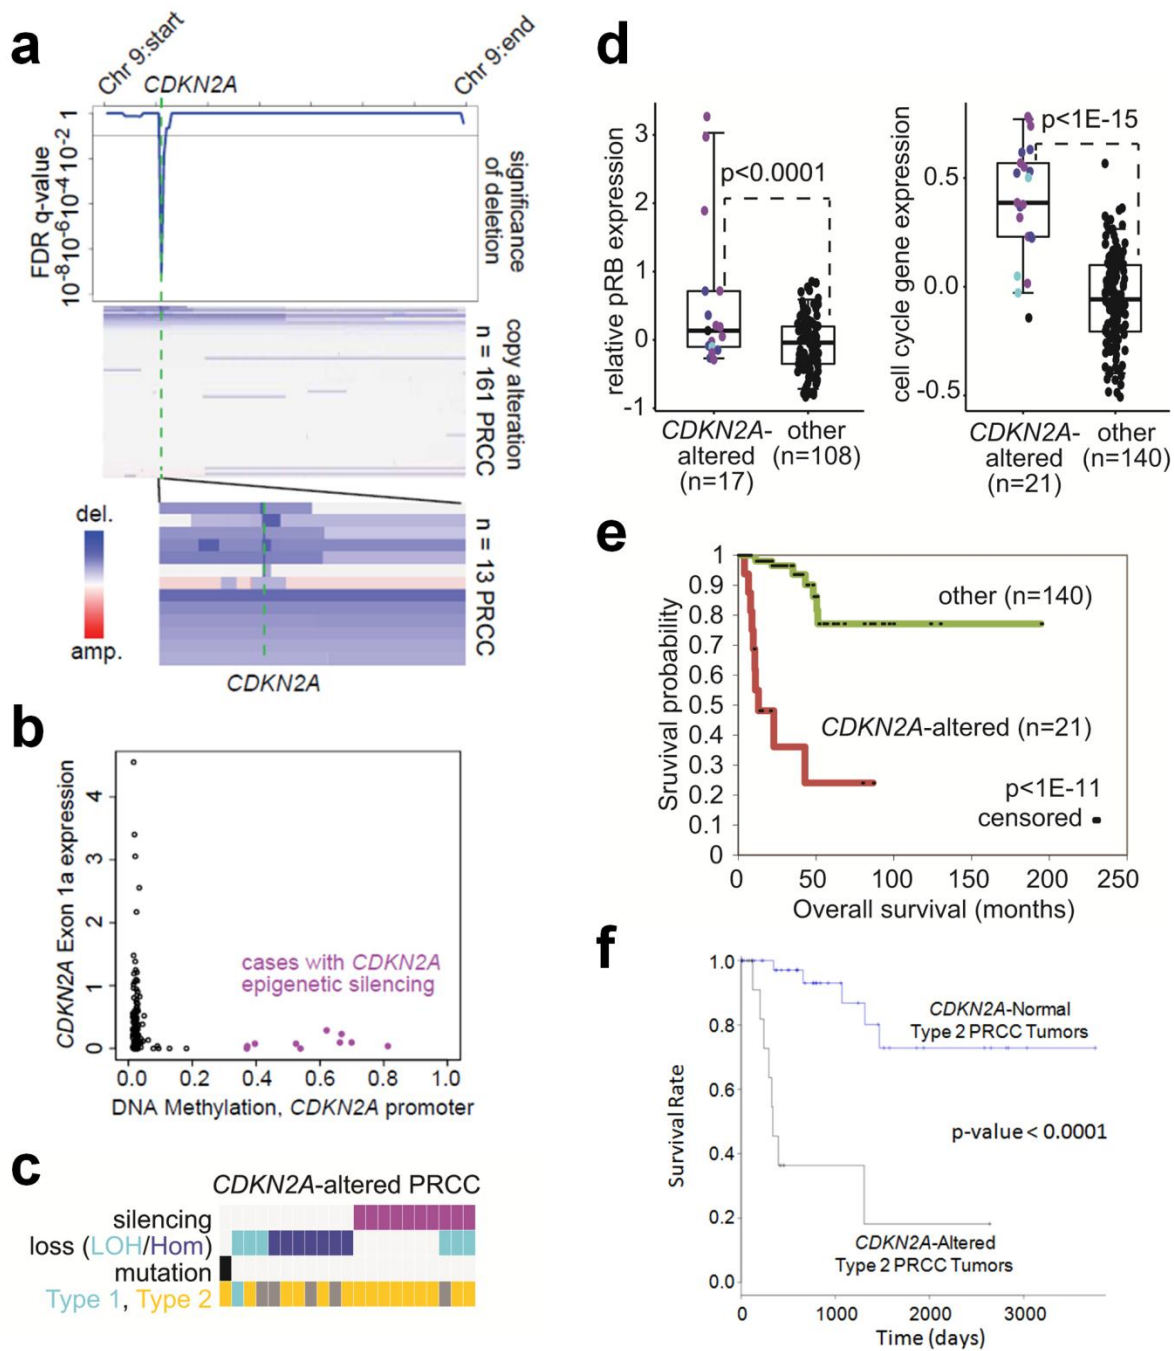

**Figure S7: *CDKN2A* Alterations in PRCC**

(a) GISTIC analysis identified a region of chromosome 9 as representing a clear target of focal copy deletion (q-value <  $1E-6$ ) in PRCC resulting in loss of genomic regions specifically surrounding *CDKN2A*. (b) Epigenetic silencing of *CDKN2A* locus in ten PRCC cases. Exon 1a expression corresponds to p16INK4a isoform. (c) PRCC cases with *CDKN2A* genetic (black = mutation, light blue = partial focal deletion, dark blue = near complete focal deletion) or epigenetic alterations (purple) (n=21 cases). (d) Comparing PRCC cases with and without *CDKN2A* alterations for differences in phospho-Rb levels (left, p < 0.0002, t-test) and average expression of cell cycle-related genes<sup>43</sup> (right, p <  $1E-10$ ). (e) Differences in patient overall survival, comparing PRCC cases with and without *CDKN2A* alterations (p <  $1E-10$ , log-rank test). (f) Kaplan-Meier survival analysis was performed comparing the PRCC tumors with *CDKN2A* alterations versus the Type 2 PRCC tumors without *CDKN2A* alterations. The *CDKN2A* altered tumors still demonstrated a significantly worse predicted survival. This demonstrated that the poorer survival rate observed when all PRCC tumors with *CDKN2A* alterations was not simply due to the increased percentage of Type 2 PRCC samples in the *CDKN2A* altered cohort compared to the *CDKN2A* normal cohort.



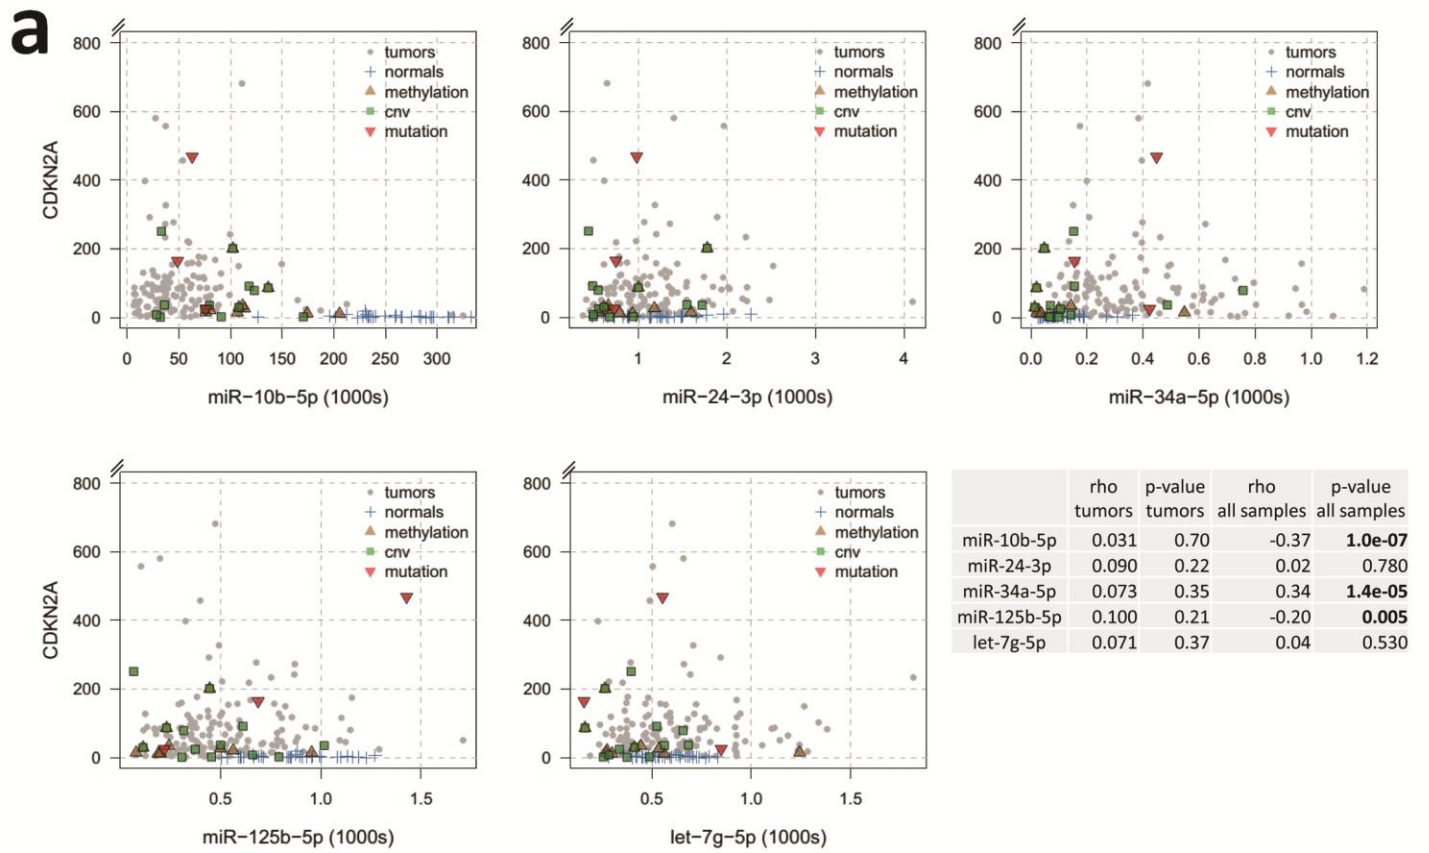

**b**

|             | Optimal RPM cutoff | log rank p-value | Hazard ratio | Lower 95% CI | Upper 95% CI | num below cutoff | num above cutoff | High expression of this miR is: |
|-------------|--------------------|------------------|--------------|--------------|--------------|------------------|------------------|---------------------------------|
| miR-34a-5p  | 98.43              | 1.11E-16         | 0.04         | 0.01         | 0.13         | 13               | 146              | Protective                      |
| miR-10b-5p  | 75287.59           | 8.88e-07         | 8.03         | 3.00         | 21.52        | 120              | 39               | Anti-protective                 |
| let-7g-5p   | 268.64             | 0.0045           | 0.19         | 0.05         | 0.68         | 12               | 147              | Protective                      |
| miR-125b-5p | 309.97             | 0.0080           | 0.29         | 0.11         | 0.77         | 38               | 121              | Protective                      |
| miR-24-3p   | 791.33             | 0.0470           | 0.40         | 0.16         | 1.02         | 45               | 114              | Protective                      |

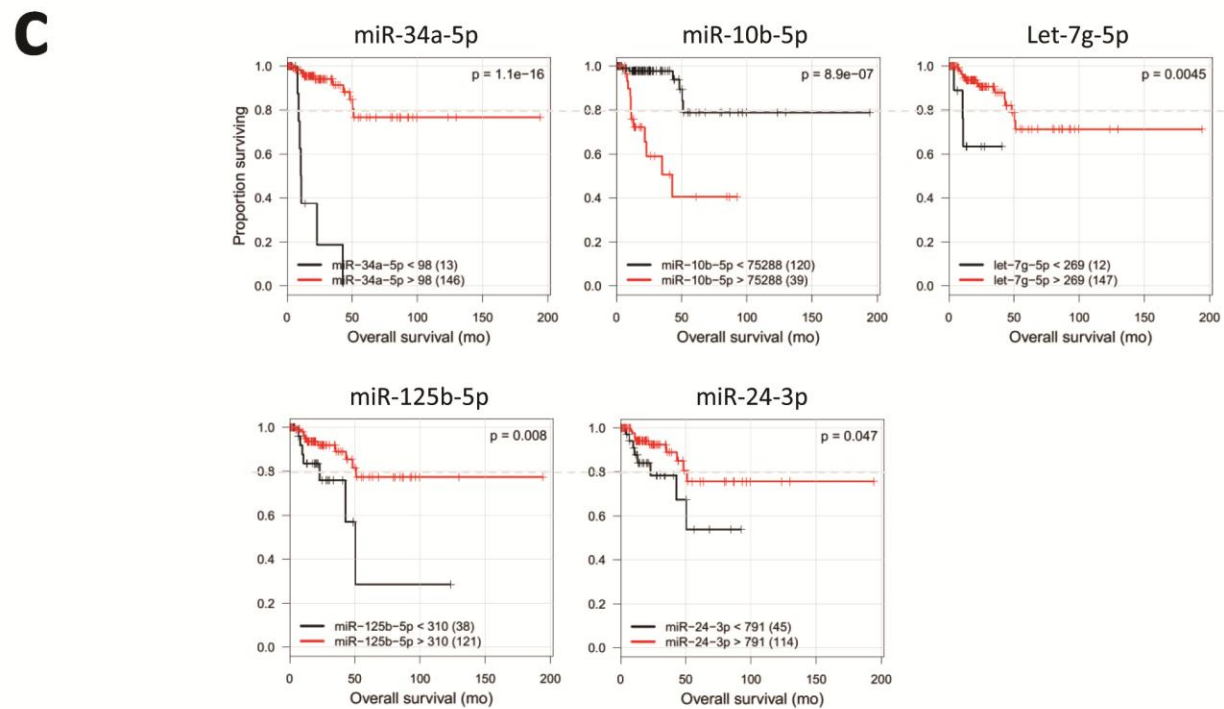

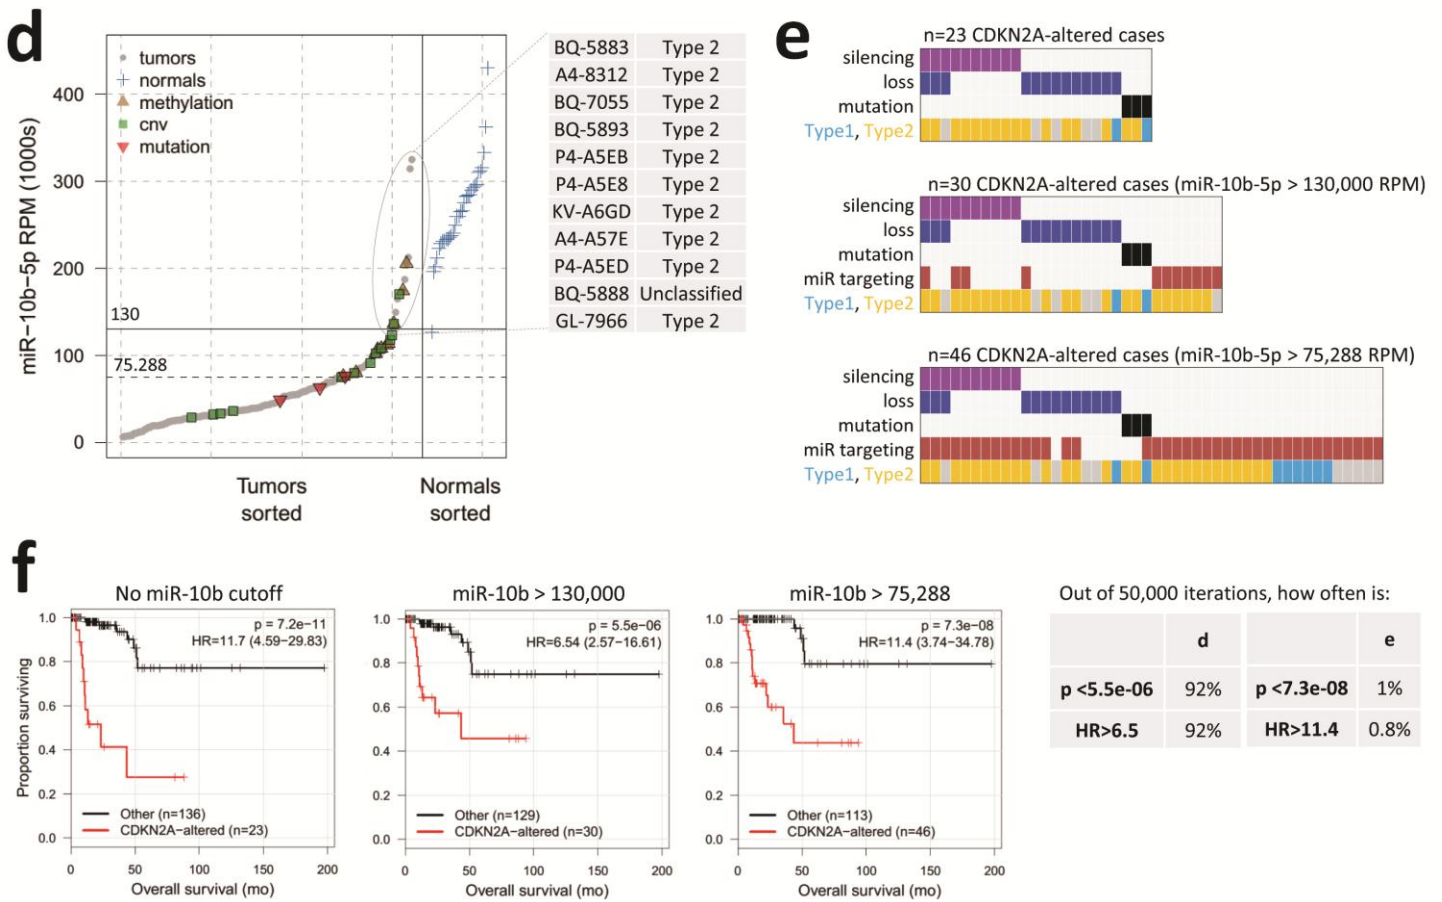

**Figure S8: Assessment of *CDKN2A* Targeting microRNAs (miRs)**

(a) *CDKN2A* vs. miR abundance in tumor (gray dots) and normal (blue plus sign) samples for the five miRs that are functionally validated as targeting *CDKN2A*: miR-10b-5p, 24-3p, 34a-5p, 125b-5p and let-7g-5p. Colored markers indicate the 23 tumor samples with a *CDKN2A* alteration. The table lists the Spearman coefficients ( $\rho$ ) and p-values for both the tumor and tumor-and-normal datasets. Of these miRs, miR-10b-5p is the most likely to influence *CDKN2A* transcript levels, as it is both highly abundant and significantly anti-correlated with *CDKN2A*.

(b) Kaplan-Meier results for the miR expression value that stratifies patients into the two groups that minimize the Kaplan-Meier log-rank p-value. The optimal threshold for miR-10b-5p is 75,288 RPM, which results in a log-rank p-value of  $8.9e-07$  and a hazard ratio of 8.0 (3.0 – 21.5). 39 patients have a miR-10b-5p expression level above this threshold and have poorer overall survival.

(c) Kaplan-Meier plots for each miR, with patients stratified by expression above or below the optimal cutoff. Red indicates the group of samples that have abundance above the cutoff.

(d) Tumor and adjacent normal samples sorted by miR-10b-5p abundance. Two horizontal lines indicate the optimal cutoff of 75,288 RPM, and a more conservative cutoff of 130,000 RPM, which we chose because the samples with higher miR-10b-5p include 10 Type 2, one unclassified, and no Type 1.

(e) Oncoprints of the 23 samples with *CDKN2A* genomic alterations, plus the samples in which miR-10b-5p RPM was above 130,000 or 75,288 RPM. The 39 patients with miR-10b-5p > 75,288 RPM are dominated by type 2 pathology, with 7 Type 1, 25 Type 2, and 7 unclassified. 70% of the *CDKN2A*-altered cases also have high miR-10b-5p abundance.

(f) Kaplan-Meier plots demonstrated the original 23 *CDKN2A*-altered samples (log-rank  $p=7.2e-11$ ) compared with either the original *CDKN2A*-altered samples plus samples with miR-10b-5p expression above 130,000 RPM ( $n=30$ , log-rank  $p=5.5e-06$ ) or the original *CDKN2A*-altered samples plus samples with miR-10b-5p expression above 75,288 RPM ( $n=46$ , log-rank  $p=7.0e-08$ ). Both options remained statistically significant, but to test if this was simply due to the original 23 samples bootstrap assessment of Kaplan-Meier was performed by adding either 7 or 23 random additional samples chosen at 50,000 times. While the addition of 7 random samples would be equally significant 92% of the time, addition of 23 random samples would only be equally significant 1% of the time. These results are consistent with miR-10b-5p directly targeting *CDKN2A* potentially being functionally important in Kidney Papillary Cancer.

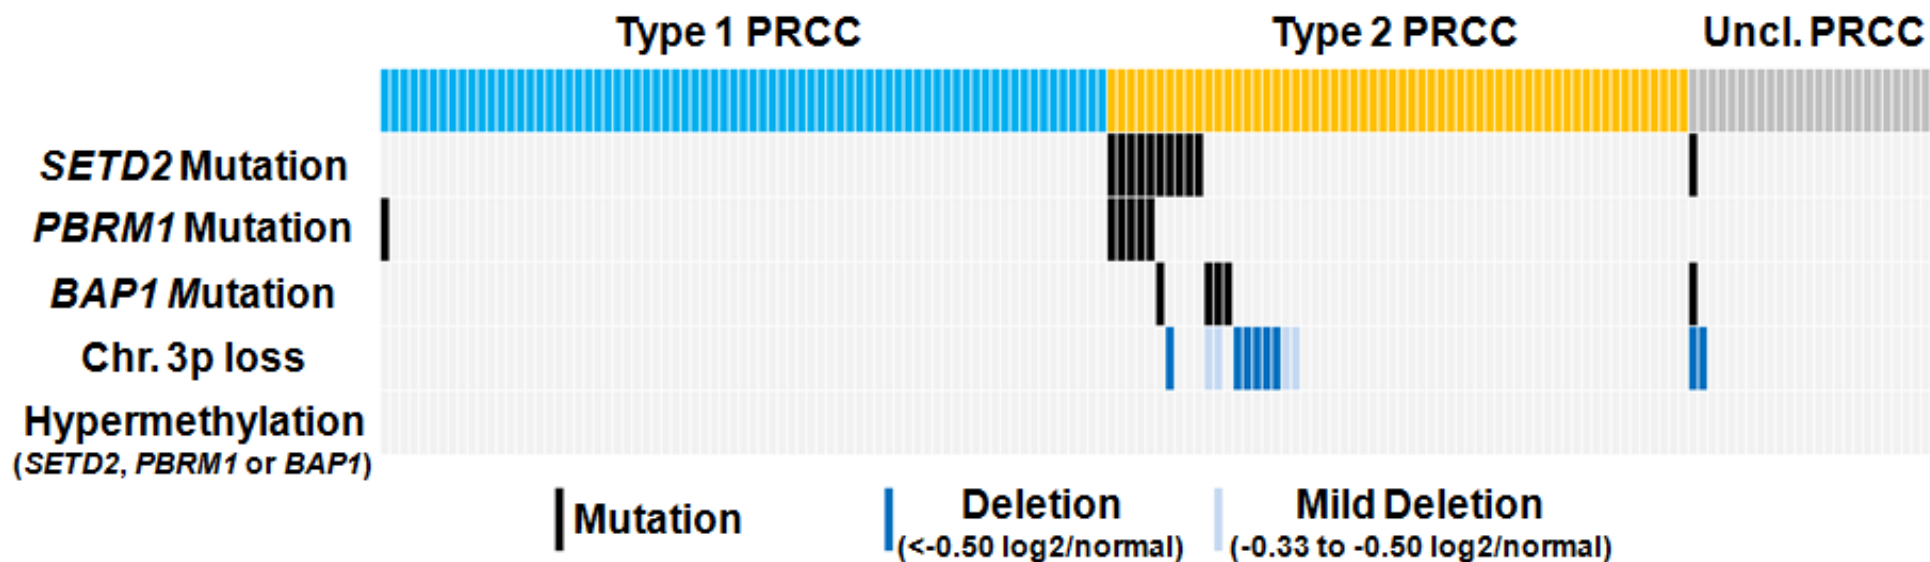

**Figure S9: Oncoprint of the Chromosome 3p-Encoded Chromatin Remodeling Tumor Suppressor Genes.**

The mutations identified in the chromosome 3p-encoded chromatin remodeling genes, *SETD2*, *PBRM1* and *BAP1*, within the PRCC samples that were analyzed by the whole exome sequencing were mapped on an oncoprint and ordered by PRCC tumor type. This demonstrates that the majority of mutation occur within the Type 2 PRCC samples and that *SETD2* and *PBRM1* mutations appear to co-occur while *PBRM1* and *BAP1* mutations are mutually exclusive. Heterozygous or mild deletion of chromosome 3p was highlighted in dark blue and light blue respectively (no homozygous loss was observed) and hypermethylation of the CpG islands associated with each of the three genes was assessed, but provided no positive hits. Loss of chromosome 3p seems to associate with Type 2 PRCC but there was only a partial overlap with mutations of *SETD2*, *PBRM1* or *BAP1* suggesting that haploinsufficiency of these genes may be important to tumorigenesis.

**a**

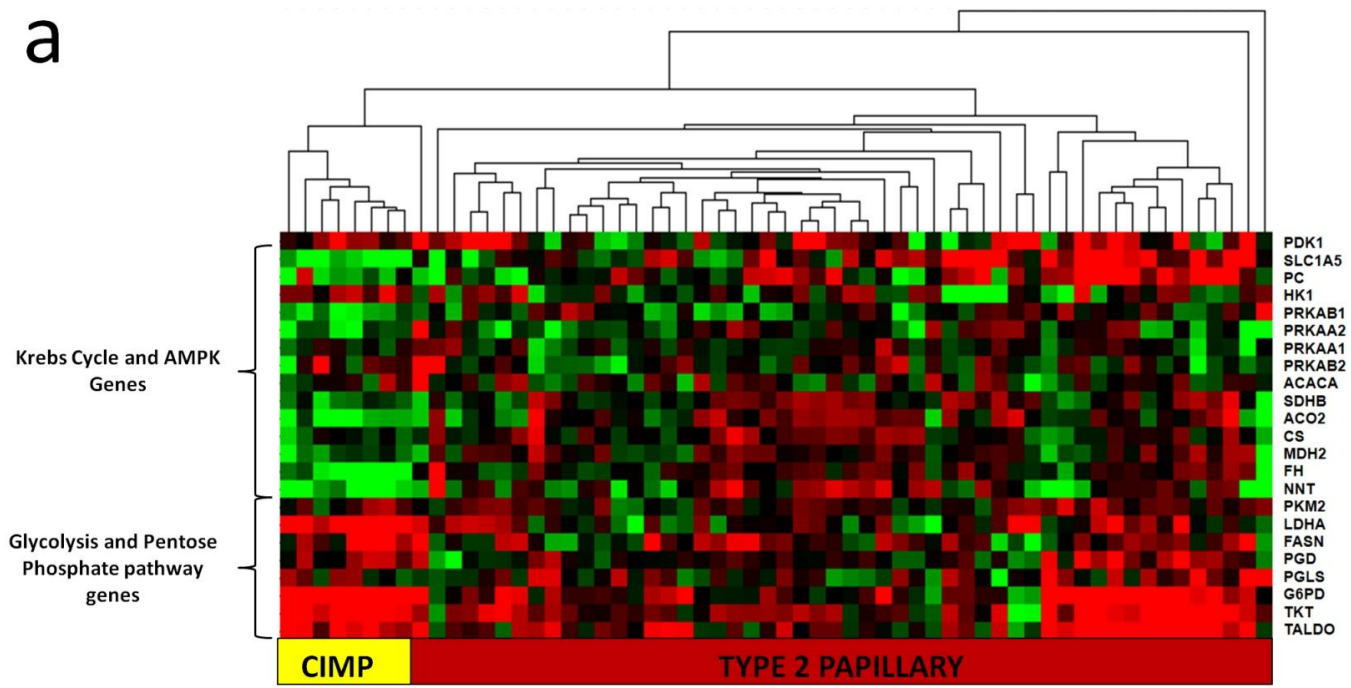

**b**

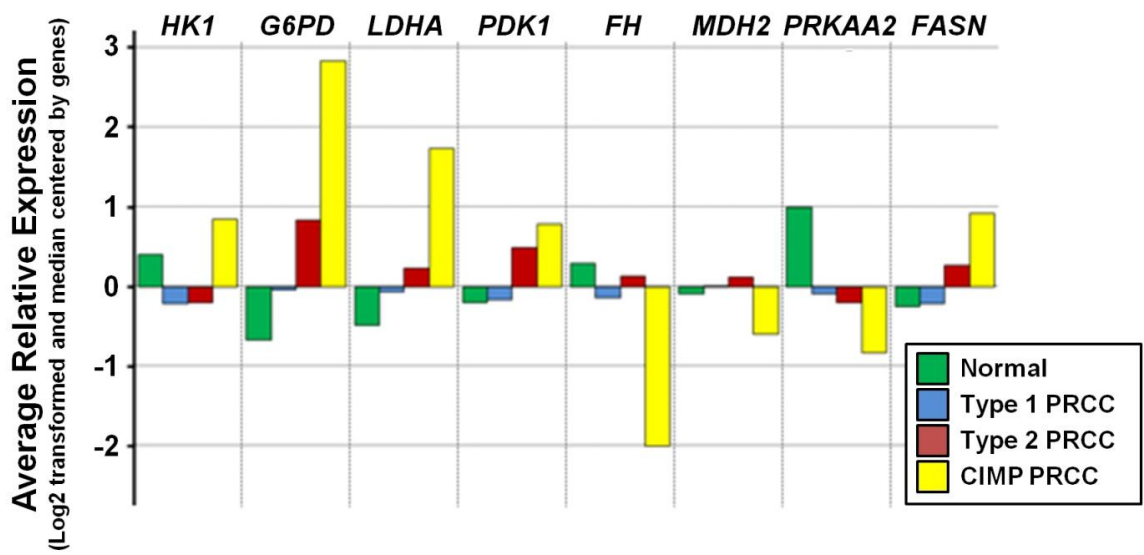

**Figure S10: Metabolic Analysis of the CIMP Associated PRCC tumors**

Analysis of the mRNA expression data by unsupervised clustering of all the genes involved in several major metabolic pathways, consisting of glycolysis, the pentose phosphate pathway, the Krebs cycle and fatty acid synthesis, demonstrated the CIMP associated PRCC clustered separately from the rest of the PRCC tumors. Due to the majority of CIMP associated tumors being Type 2 PRCCs, this separation was confirmed by assessing all Type 2 PRCCs using a selection of metabolic genes.

**(a)** This heatmap demonstrates the unsupervised clustering of the all the Type 2 PRCC tumors (n=60), including the CIMP associated Type 2 PRCC tumors (n=8) for a selection of glycolysis genes (*HK1*, *PKM2*, *LDHA*), pentose phosphate pathway genes (*PGD*, *PGLS*, *G6PD*, *TKT*, *TALDO*), Krebs cycle genes (*PDK1*, *CS*, *ACO2*, *SDHB*, *FH*, *MDH2*, *PC*, *NNT*), fatty acid synthesis genes (*FASN*, *ACACA*), AMPK genes (*PRKAA1*, *PRKAA2*, *PRKAB1*, *PRKAB2*) and the glutamine transporter gene, *SLC1A5*. The CIMP associated Type 2 PRCC tumors produced a distinct cluster.

**(b)** The average relative mRNA expression for 8 key genes within the glycolysis, Krebs cycle and fatty acid synthesis pathways (*HK1*, *G6PD*, *LDHA*, *PDK1*, *FH*, *MDH2*, *PRKAA2* and *FASN*) were calculated for either the associated normal kidney samples (green), the Type 1 PRCCs (blue), the Type 2 PRCCs (red) or the CIMP associated PRCCs (yellow).

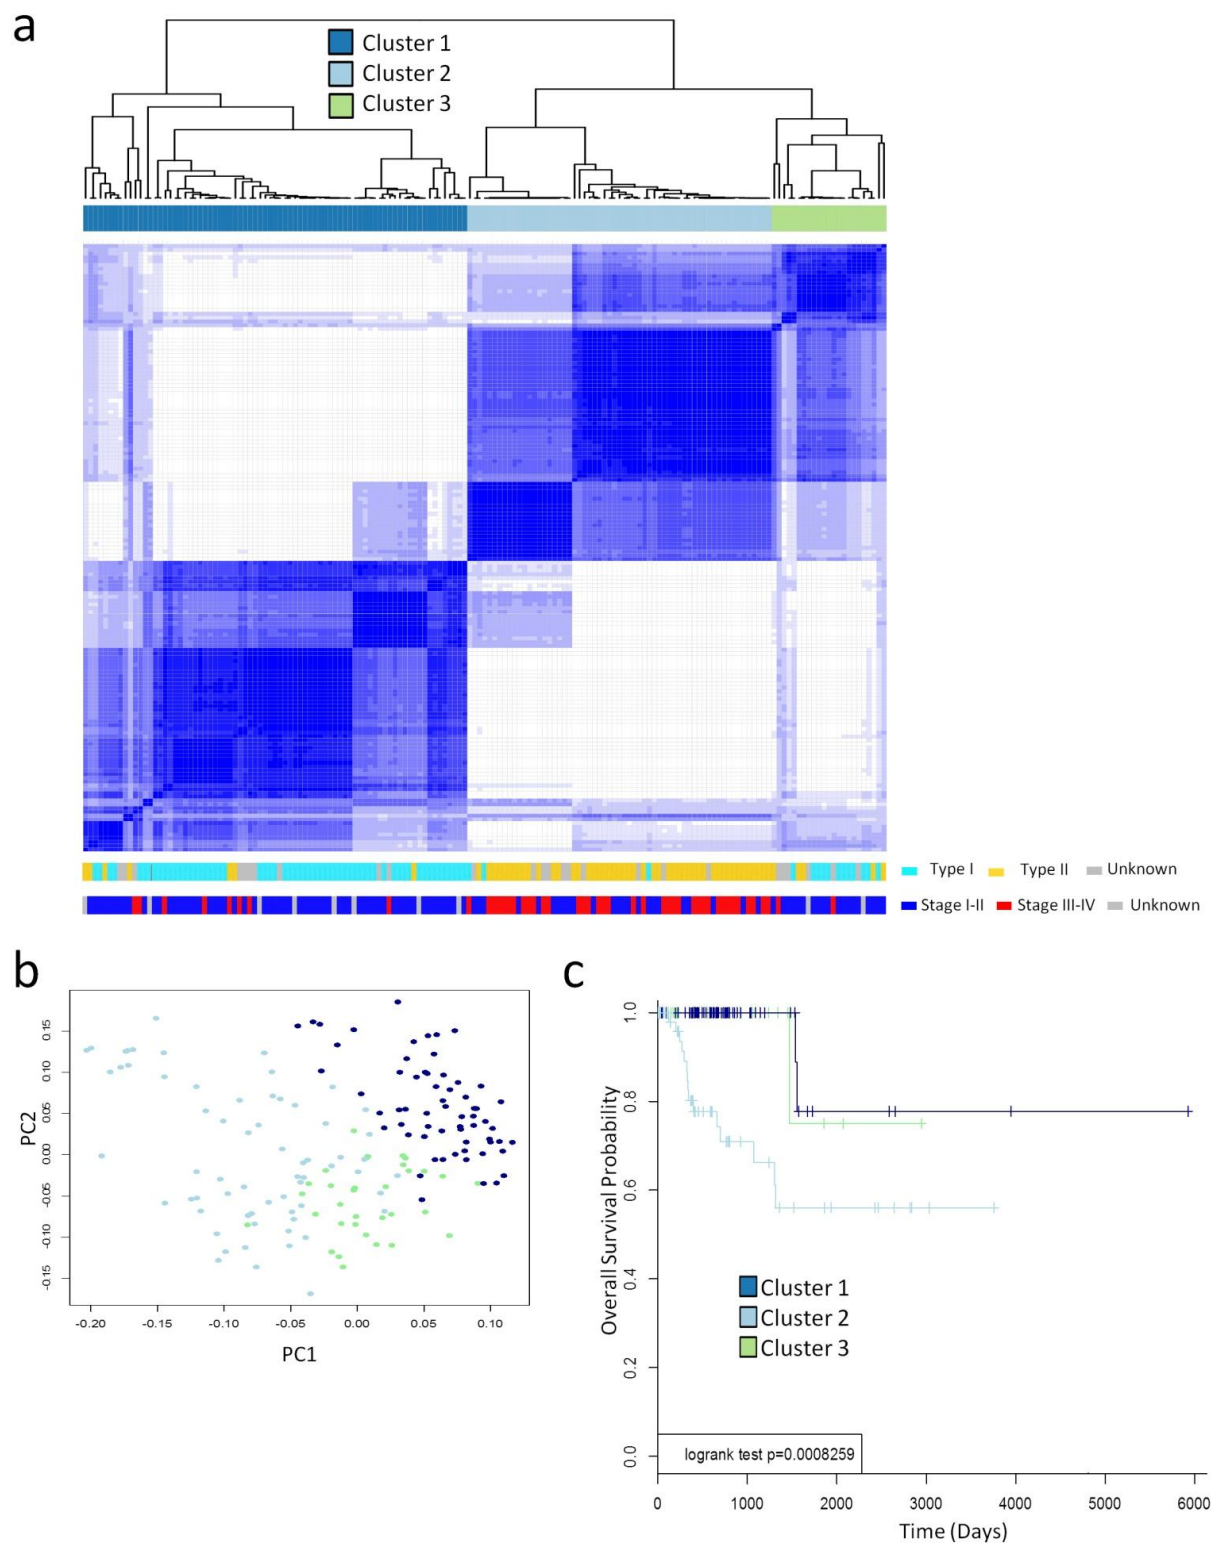

**Figure S11: mRNA Expression Analysis in 161 Papillary Renal Cell Carcinomas**

**(a)** Results of unsupervised consensus clustering of RNA-Seq data for 161 pRCC tumor samples. 2050 genes were used to identify three distinct clusters within tumor samples, which are illustrated by consensus matrices. No divergent groups were identified beyond  $k$  mean 3. The PRCC type and tumor stage were indicated.

**(b)** Principal component analysis using the same genes identified in **(a)** illustrated the three distinct clusters.

**(c)** Kaplan-Meier curves were used to calculate overall survival for each mRNA cluster, with a long-rank  $p$ -value.

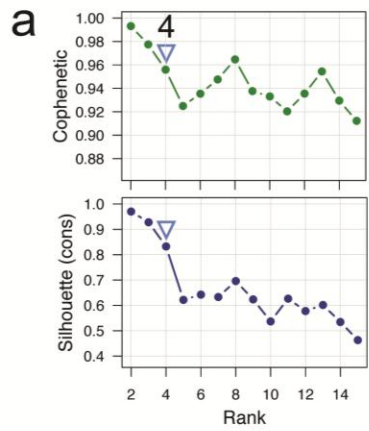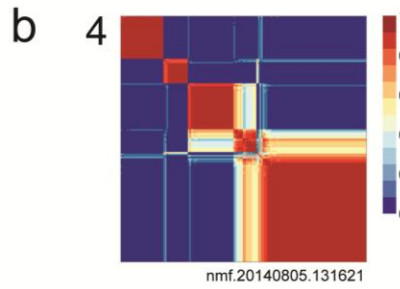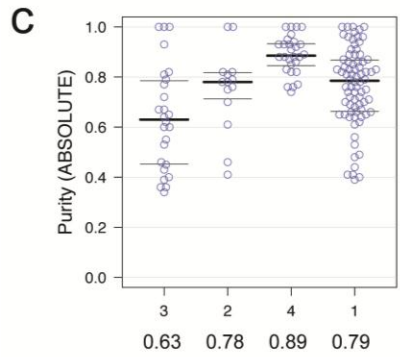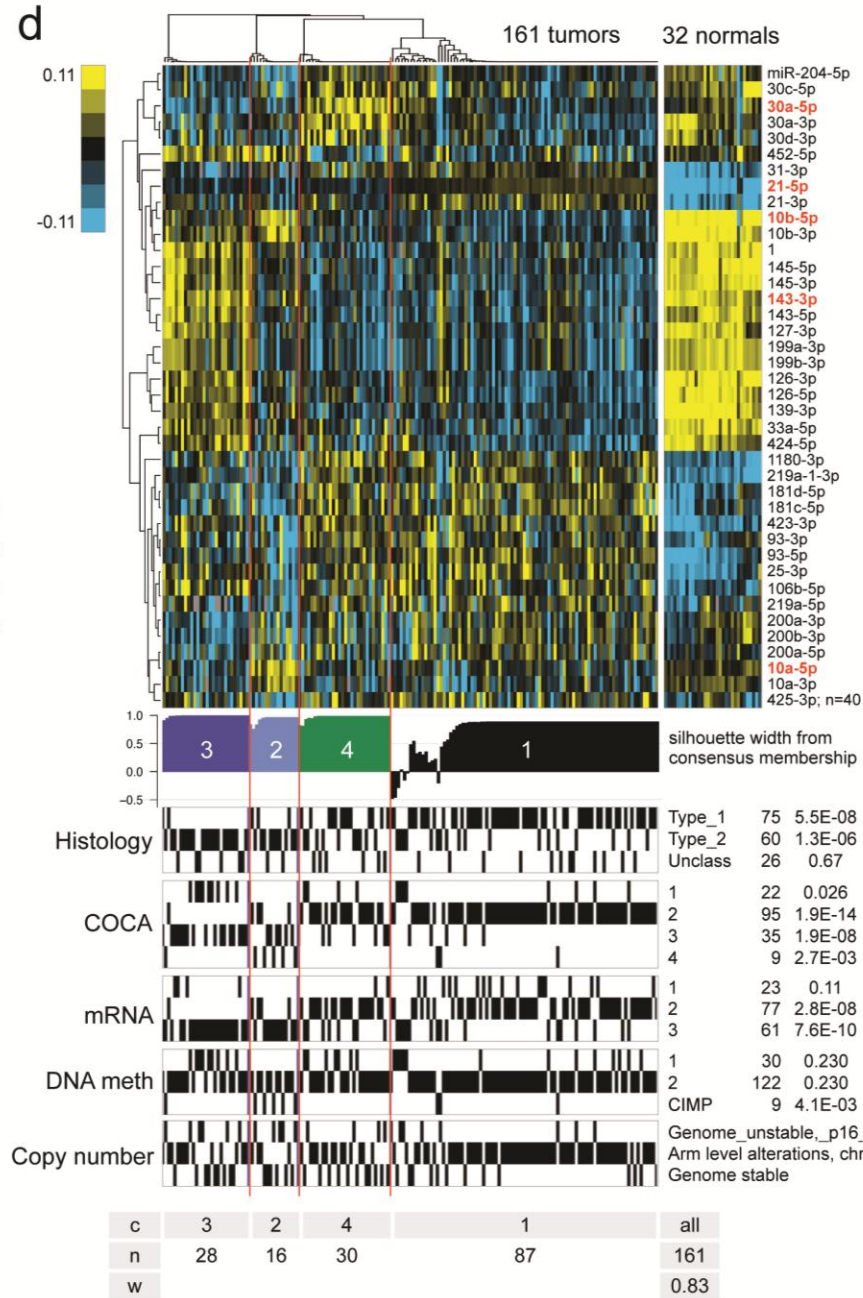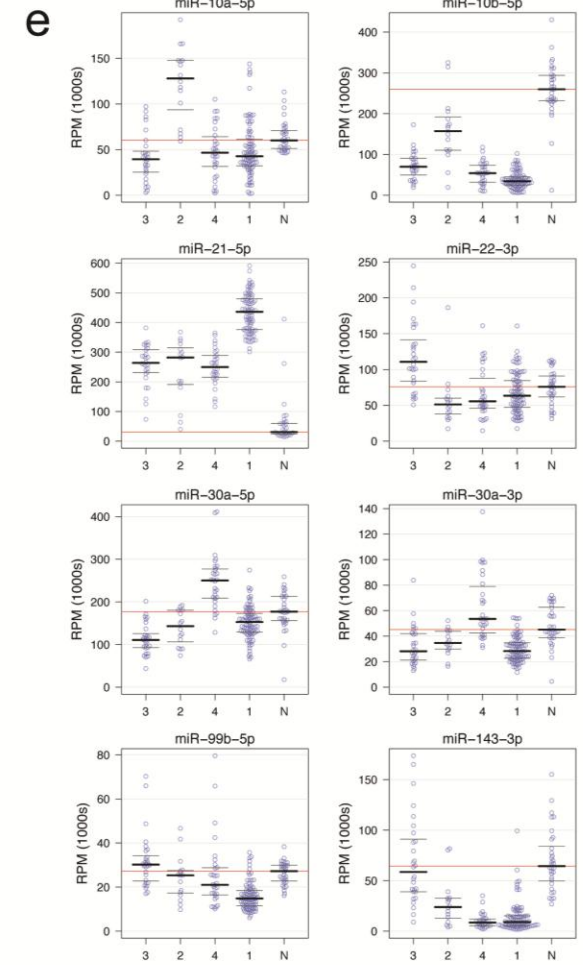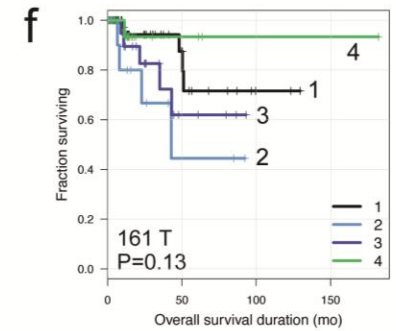

## Figure S12: Unsupervised NMF Consensus Clustering of miR-Seq Data for 161 PRCC Tumor Samples

- (a) Rank survey profiles for cophenetic correlation coefficient and average silhouette width.
- (b) Consensus membership heatmap for a four-cluster solution, with yellow-white indicating samples that are less ‘typical’ cluster or group members.
- (c) Per-cluster distributions of ABSOLUTE (Carter 2012) tumor sample purity. The median purity per cluster was at least 0.78 for clusters 1, 2 and 4, and was 0.63 for cluster 3.
- (d) For the four-group solution, top to bottom: a normalized abundance heatmap for the 40 5p or 3p mature strands that were highly ranked as differentially abundant; silhouette width profile calculated from the consensus membership; covariates with Fisher exact association  $P$ -values; and a summary table of cluster number, number of samples in each cluster, and the overall average silhouette width. The scale bar shows row-scaled  $\log_{10}(\text{RPM}+1)$  miR abundance. In the covariate tracks under the heatmap, Types 1 and 2 were strongly associated with the miR clusters ( $P=5.5E-8$  and  $1.3E-6$  respectively), while unclassified samples were statistically independent of the miR clusters ( $P=0.67$ ). Clusters 2 ( $n=16$ ) and 3 ( $n=28$ ) were largely Type 2 samples, while cluster 1 ( $n=87$ ) was enriched in type 1 samples. Cluster 4 ( $n=30$ ) contained both type 1 and 2 samples. Of miR cluster 1’s 87 samples, 8 samples (21%) were considered atypical cluster members, because they had silhouette widths below 0.6, which is approximately 0.7 of the cluster’s maximum silhouette width, 0.884. The miR clusters were associated with COCA clusters 2 to 4 ( $P<2.7E-3$ ), mRNA clusters 2 and 3 ( $P<2.8E-8$ ), the CIMP DNA methylation cluster ( $P=4.1E-3$ ), and the arm level/chromosome 7 gain copy number cluster ( $P=1.8E-4$ ) (Fig. S1d). We noted that both of the type 2-enriched miR clusters (2 and 3) were enriched in COCA cluster 3 and mRNA cluster 3. In contrast, miR cluster 2, but not miR cluster 3, was enriched in COCA cluster 4 and DNA methylation CIMP samples. Both the type 1-enriched miR cluster 1 and the mixed type miR cluster 4 were enriched in COCA cluster 2 and mRNA cluster 2. miR cluster 1 was enriched in arm level/chromosome 7 gain copy number alterations.
- (e) Per-cluster distributions of normalized (RPM) abundance for a subset of miRs that were highly scored by NMF as discriminatory. Black horizontal bars indicate median RPMs. The Type 1-enriched miR cluster 1 was discriminated by very high miR-21-5p levels, and had less abundant miR-10b, 99b-5p and 143-3p than adjacent normal samples. miR cluster 2 was discriminated from other tumor clusters by high miR-10a-5p and only moderately less abundant miR-10b-5p, and had high miR-21-5p and moderately lower miR-143-3p than adjacent normal samples. miR cluster 3 was discriminated from other tumor clusters by high miR-22-3p, low miR-30a-5p, and near-normal levels of miR-143-3p, while having a low miR-10b-5p level comparable to type 1 clusters 1 and 4, moderately high miR-21-5p levels that were comparable to type 2 cluster 2 and type 1 cluster 4, and miR-143-3p levels comparable to adjacent normal. miR cluster 4, which contains both type 1 and 2 samples, was discriminated by high miR-30a-5p and -3p, and had higher miR-21-5p and lower miR-143-3p than adjacent normal samples.
- (f) Kaplan-Meier plot for overall survival for the four unsupervised clusters, with a log-rank  $P$ -value. The two type 2 miR clusters trended to poorer outcomes than the type 1 clusters (log-rank  $P=0.13$ ).

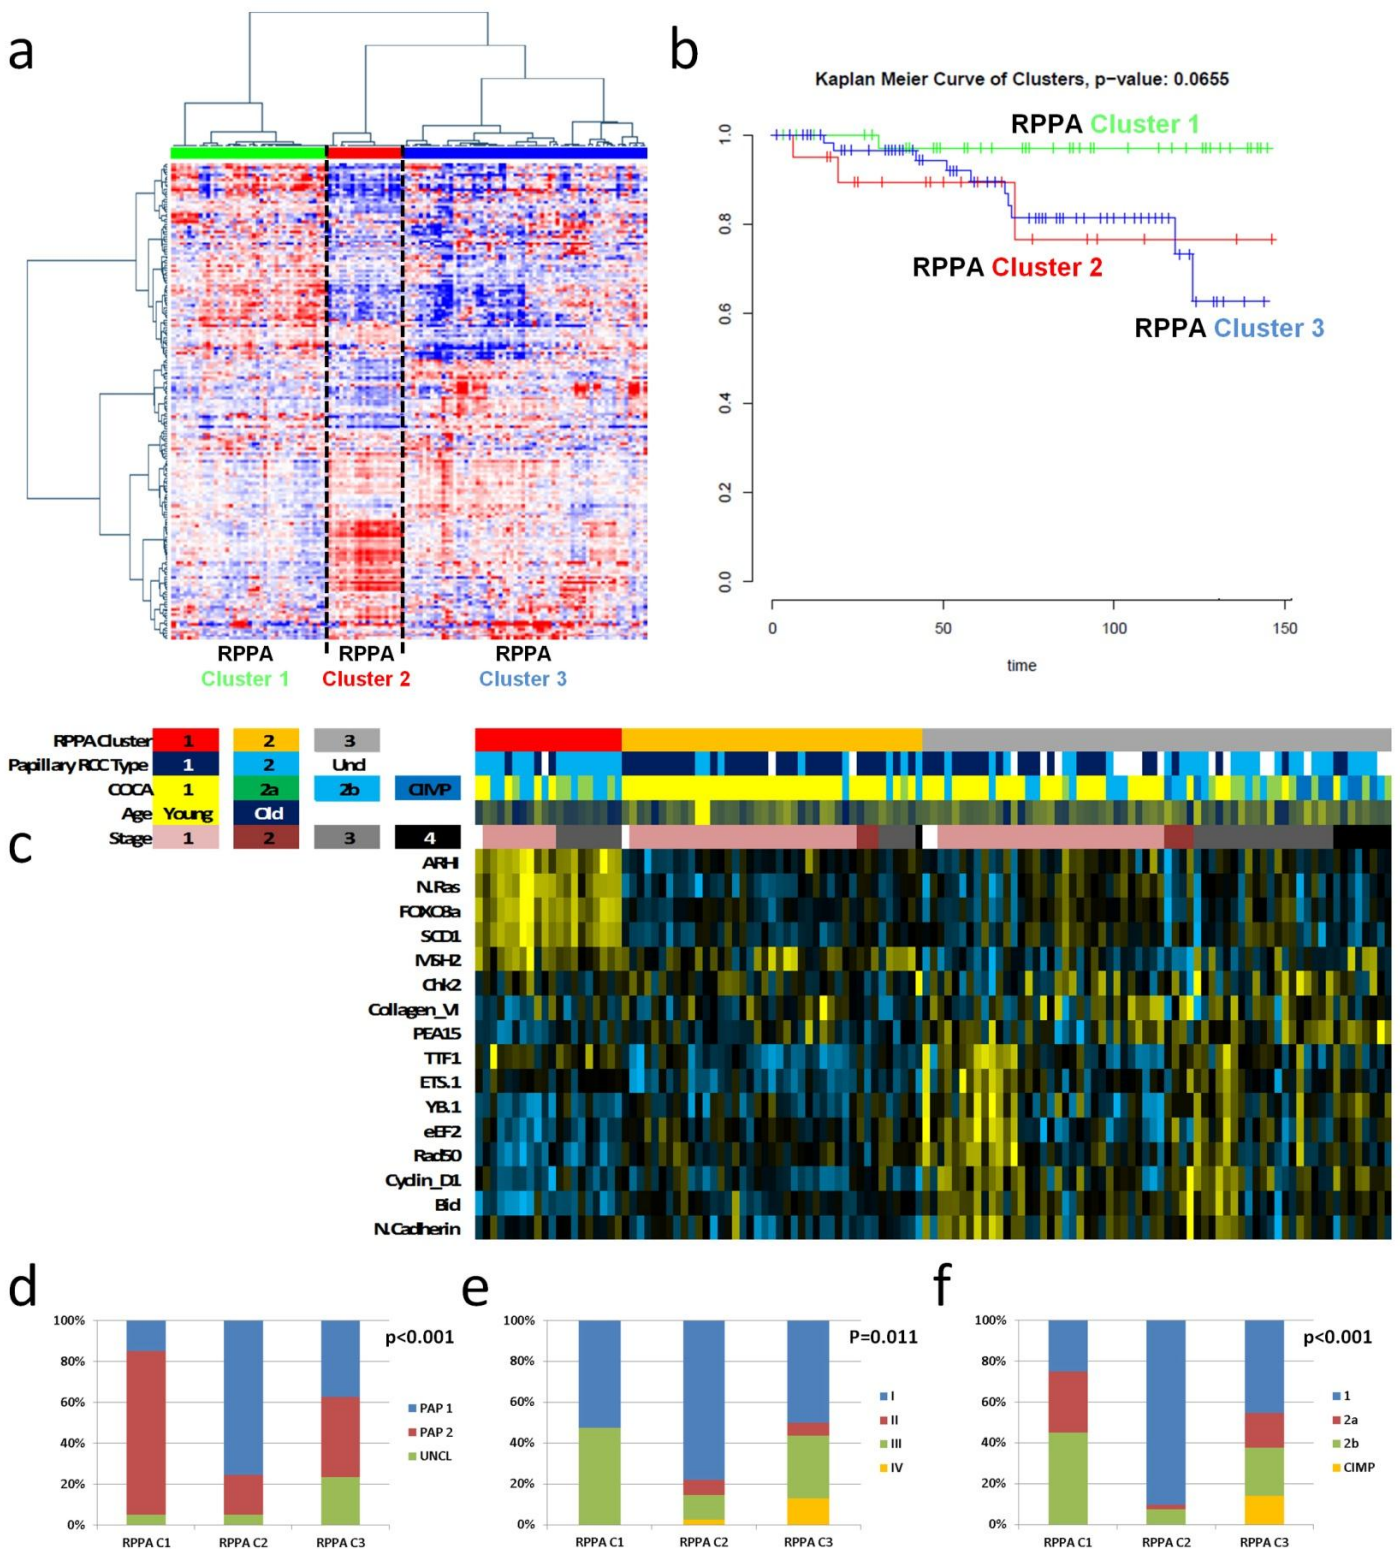

**Figure S13: Clustering of papillary RCC tumors based on RPPA data reveals distinct subtypes**

(a) Consensus Cluster analysis of 193 RPPA probes from 125 papillary RCC tumors reveals three distinct clusters. (b) A trend towards superior overall survival for RPPA cluster 2 tumors relative to other tumors was observed. (c) A heatmap for the 16 most differentially expressed proteins annotated for Papillary type, COCA cluster, age and stage. The three RPPA clusters have distinct clinical and molecular features: (d) RPPA cluster 1 is contains mostly papillary type 2 tumors while RPPA cluster 2 contains predominantly papillary type 1 tumors. Meanwhile, RPPA cluster 3 tumors contain more histologically unclassified papillary tumors, (e) stage IV tumors, and (f) CIMP tumors.



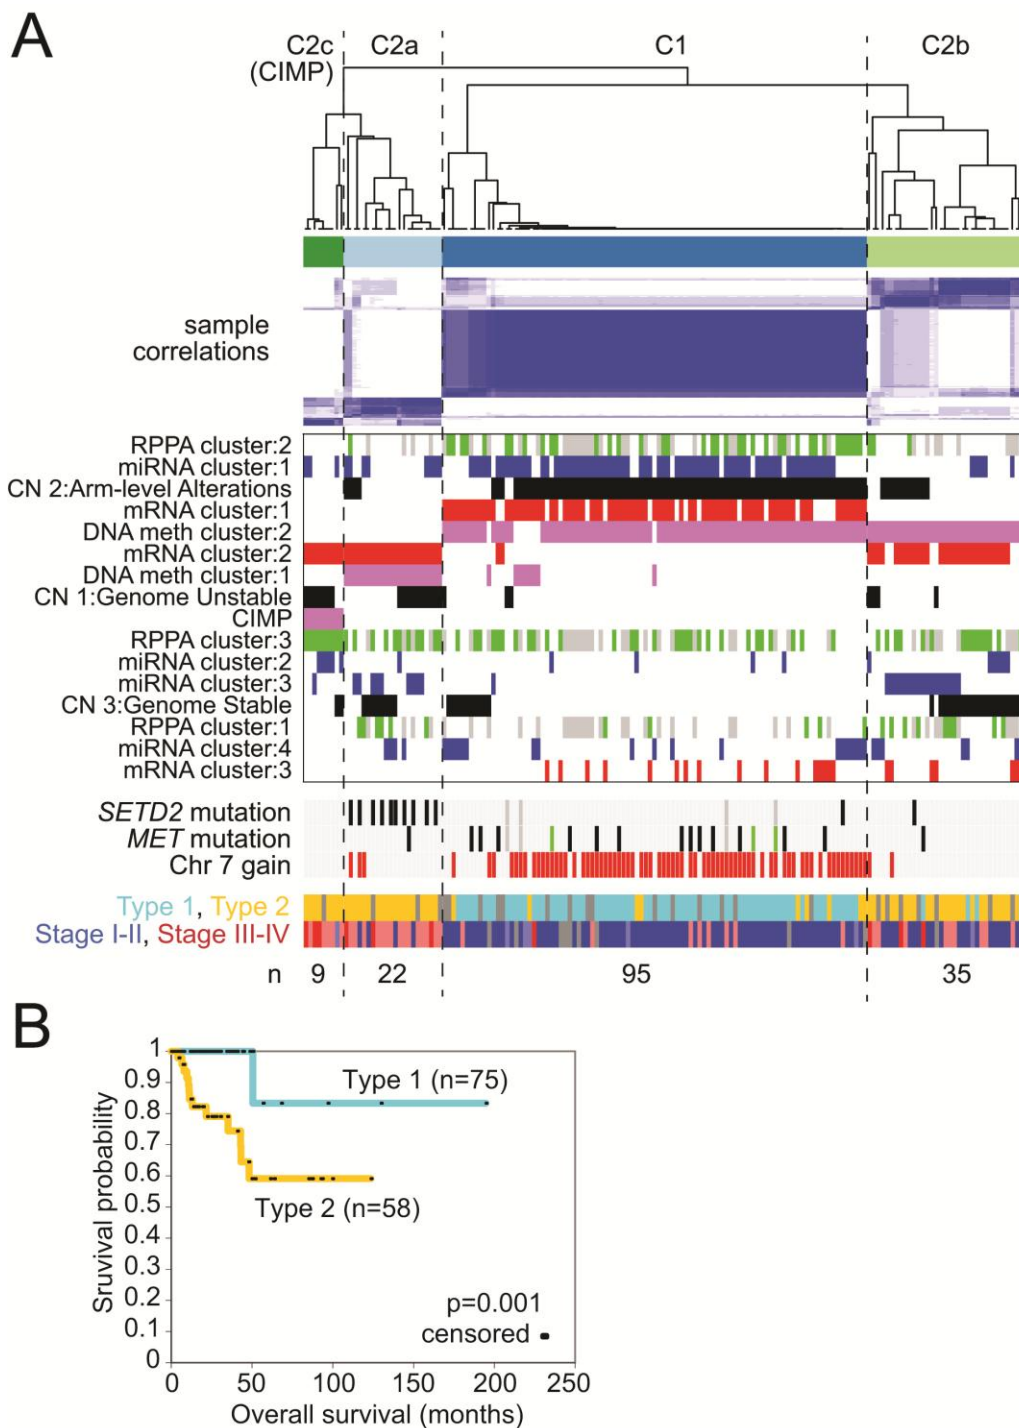

**Figure S14: Multi-platform-based Cluster of Cluster Analysis (COCA) in PRCC**

**(a)** Integration of subtype classifications from five “omic” data platforms identified four major PRCC groups: C1, C2a, C2b, and C2c (representing the CIMP PRCCs). The blue and white heat map displays sample consensus, below which a second heat map displays the subtypes defined independently by DNA methylation (Pink), Chromosomal copy number (CN)(Black), miRNA expression (Blue), mRNA expression (Red), and protein (RPPA) expression (Green, Gray represents samples missing RPPA expression data). Somatic (Black) and Germline (Green) mutations for *MET* and *SETD2* and gain of chromosome 7 (Red) was indicated for each tumor. Tumor type and stage were designated with Type 1 in light blue, Type 2 in yellow, and those not classified in gray, while stages I and II were shown in dark blue or light blue respectively, and stages III and IV were shown in light red or dark red respectively. **(b)** Differences in patient overall survival between histology-based subtypes Type 1 and Type 2 (left,  $p=0.001$ , log-rank).

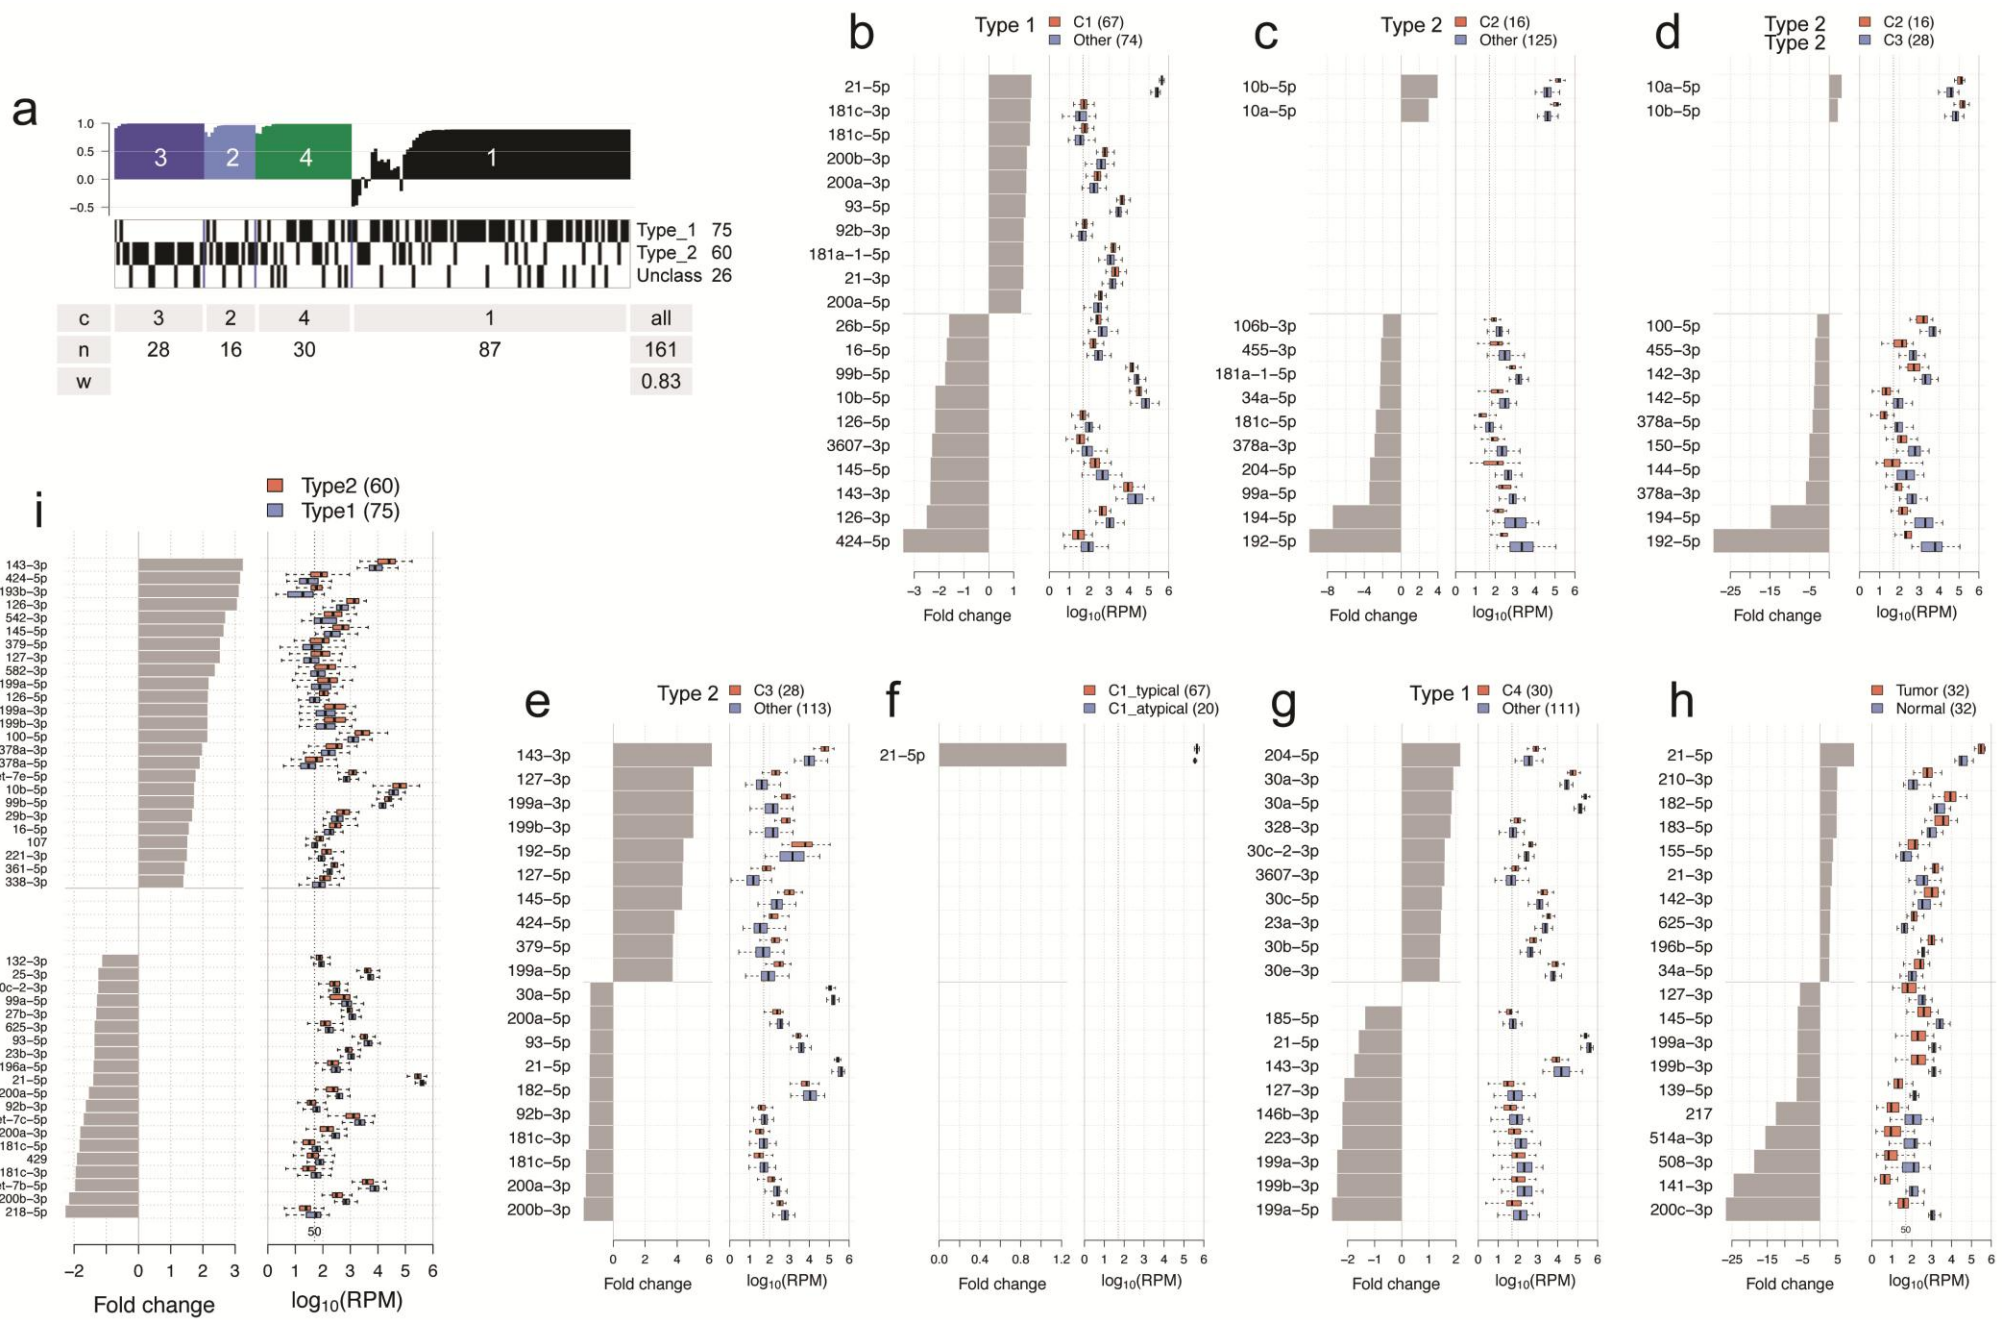

## Figure S15: Differentially Abundant miRs

(a) Silhouette width profile, histology and summary table for the four-cluster NMF solution.

(b-i) miRs that were differentially abundant between pairs of unsupervised miR sample groups. (b) Cluster 1 vs. all other samples. (c) Cluster 2 vs. all other samples. (d) Cluster 2 vs. cluster 3. (e) Cluster 3 vs. all other samples. (f) Within cluster 2, typical vs. atypical samples, separating samples by the silhouette width profile. (g) Cluster 4 vs. all other samples. (h) Tumor samples vs. matched adjacent normals, n=32. (i) All Type 1 vs. all type 2 samples. Each panel has (left) a barplot of median-based fold change, and (right) boxplots showing distributions of normalized (RPM) abundance, with black vertical lines indicating medians. Up to 15 (25 in panel i) of the largest fold changes in each direction are shown. The numbers of samples in each group are in parentheses. Only miRs that have a mean abundance of at least 50 RPM are shown. Results from two-class comparisons were consistent with NMF results (**Fig. S12d** and **S12e**). For example, miR-21-5p had both the largest positive fold change and the highest absolute abundance, and, of miRs with negative fold changes, miRs 99-5p, 10b-5p and 143-3p were the most abundant. Of miRs that were differentially abundant between 32 matched tumors and adjacent normals, the largest negative fold changes (i.e. less abundant in tumor samples) were miR-200c-3p and 141-3p from the miR-200-family, followed by miR-508-3p and miR-514a-3p, two miRs from an Xq27.3 genomic cluster that includes 15 miRNAs. Many miRs were differentially expressed between Type 2 and 1 samples. Of miRs that were more abundant in Type 2 (i.e. positive fold changes), miR-143-3p and miR-10a-5p were the most abundant, while for negative fold changes, miR-21-5p was the most abundant, followed by let-7b-5p, 25-3p, 93-5p, let-7c-5p, and 200b-3p. The only miR that was differentially abundant between the typical and atypical samples in miR cluster 1 was miR-21.

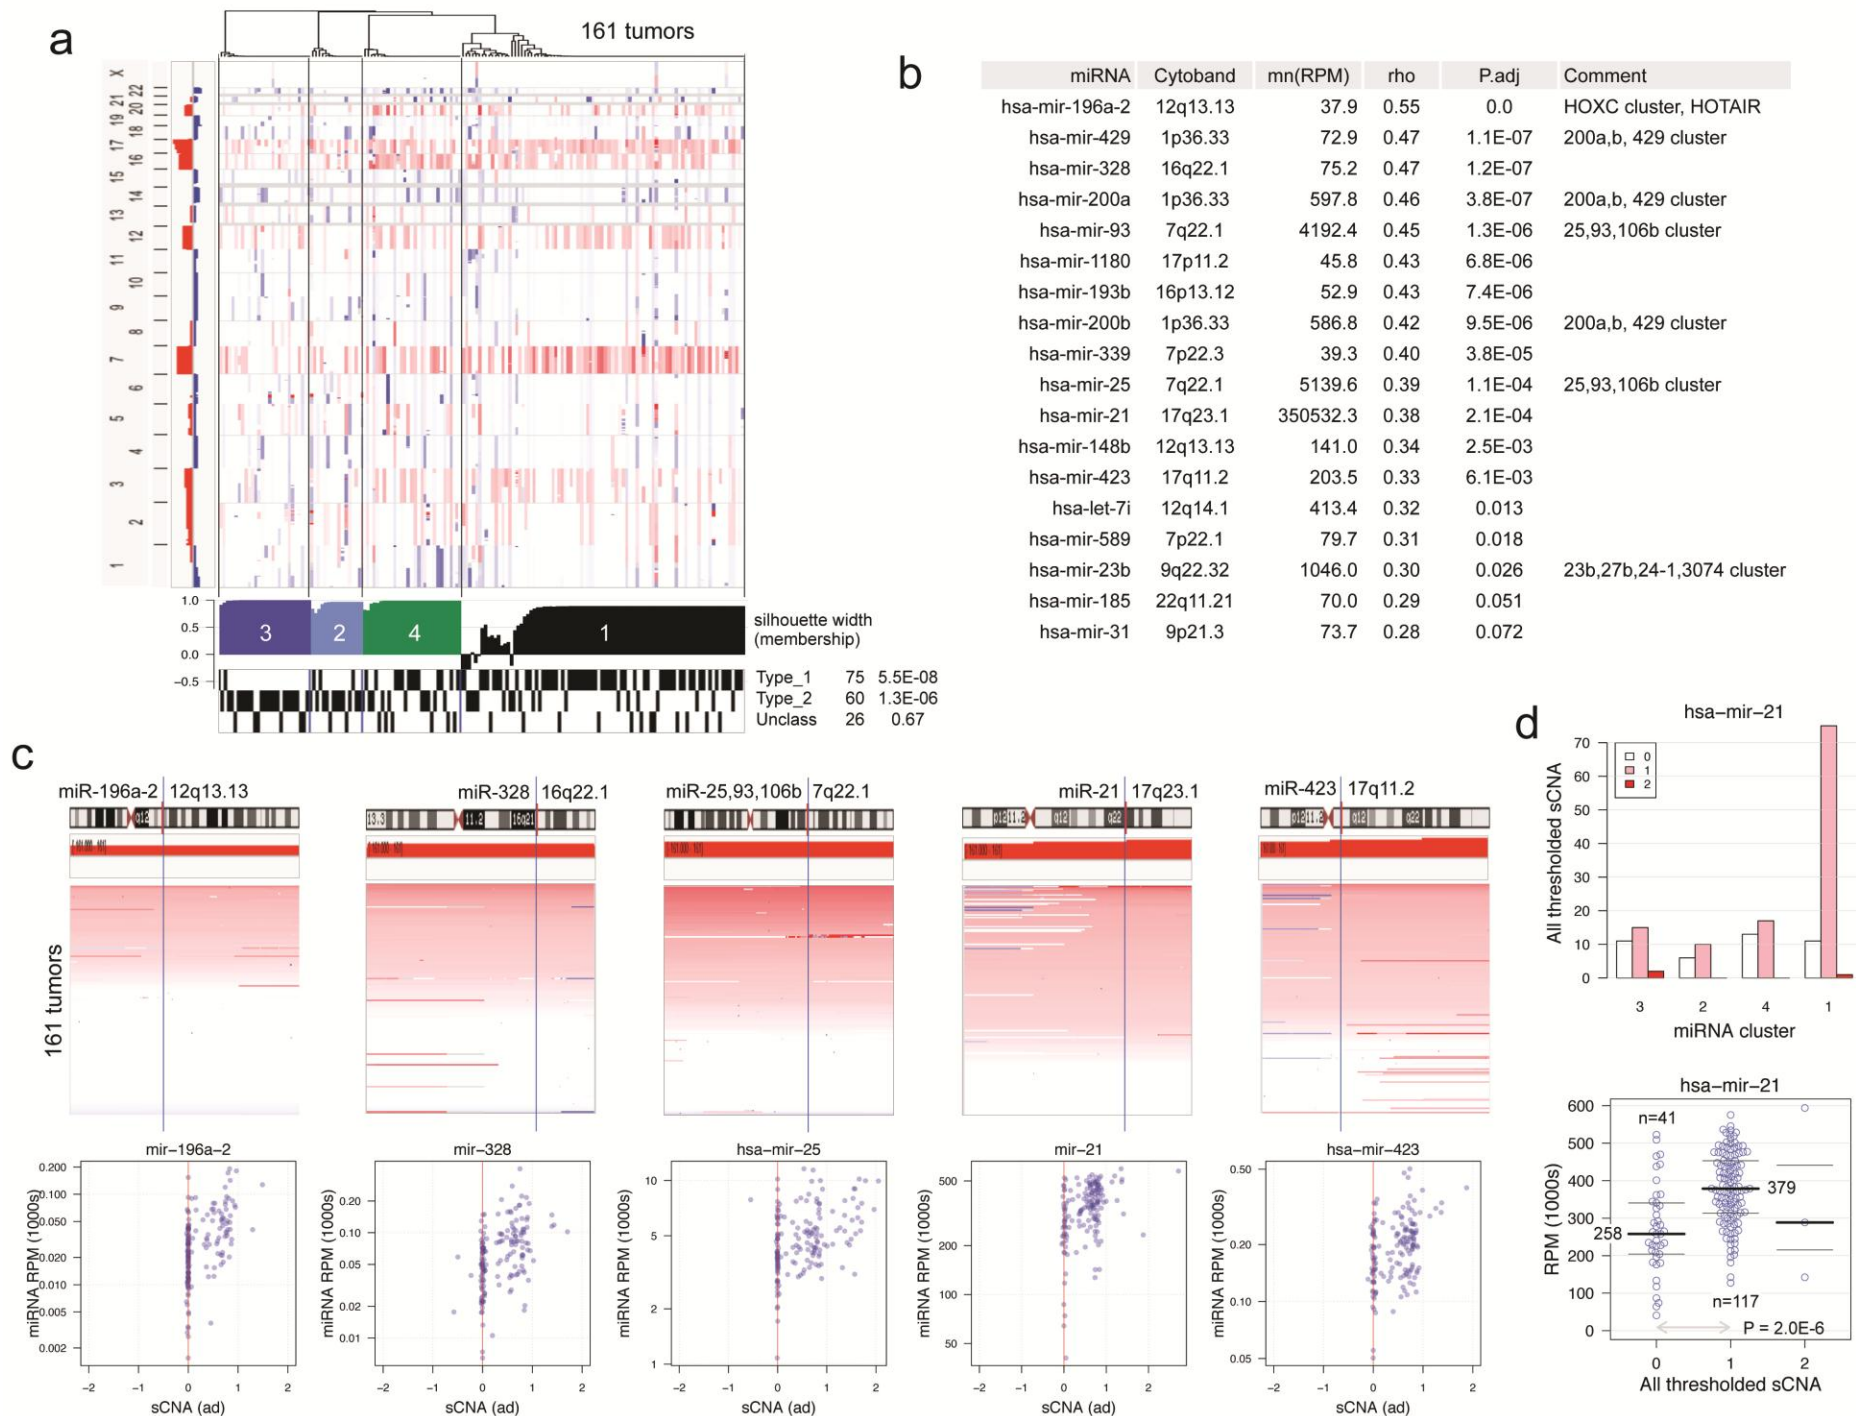

## Figure S16: Somatic Copy Number Alterations (sCNA) and miRNAs

(a) sCNA heatmap, ordered by the miRNA unsupervised clustering solution (**Fig. S12d**). The Type 2-enriched miR clusters 2 and 3 had fewer amplifications than the other two miR clusters in chromosomes 3, 7, 12, 16 and 17.

(b) pre-miRNAs that are statistically associated with sCNA (Spearman correlation, BH-corrected  $P < 0.1$ ). Samples shown have mean RPM  $> 25$ . The relatively few miRNAs that were strongly associated with sCNA included the miR-200a,b/429 genomic cluster, and the miR-25~106b genomic cluster, which is paralogous to the miR-17~92a cluster.<sup>27</sup> (c) Per-chromosome sCNA heatmaps and sCNA-RPM scatterplots for a subset of pre-miRNAs in (b). Vertical lines show the locations of the miRNAs. These details help interpret the correlation results in (b). (d) Above: Number of samples with thresholded sCNA of 0, 1 or 2 across the miR unsupervised clusters. Below: the RPM abundance of miR-21 as a function of thresholded sCNA. The P-value between sCNA=0 and 1 is from a one-sided KS test. Of the sCNA-associated miRNAs, miR-21 on 17q23.1 was by far the most abundant (b), and so is likely influential.<sup>27</sup> sCNA appears to contribute to miR-21 being relatively abundant in miR cluster 1, as copy number gains were enriched in this miR cluster and the miRNA was more abundant with such gains (one-sided KS test,  $P=2.0E-6$ ).

**a** Genes Higher in Type 2 (60) vs Type 1 (75)  
353 genes (fold change  $\geq 2.0$ , T-Test  $p < 0.000001$ )

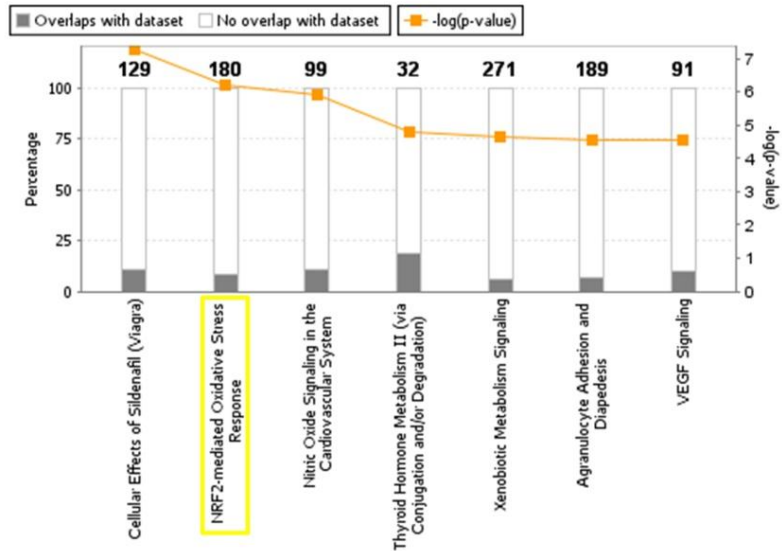

**b** NRF2 mediated Oxidative Stress Response  
Pathway Genes enriched in Type 2 PRCC (n=15)

| Symbol | Entrez Gene | Entrez Gene Name                                        |
|--------|-------------|---------------------------------------------------------|
| ABCC2  | 1244        | ATP-binding cassette, sub-family C (CFTR/MRP), member 2 |
| ACTA2  | 59          | actin, alpha 2, smooth muscle, aorta                    |
| ACTC1  | 70          | actin, alpha, cardiac muscle 1                          |
| ACTG2  | 72          | actin, gamma 2, smooth muscle, enteric                  |
| EPHX1  | 2052        | epoxide hydrolase 1, microsomal (xenobiotic)            |
| FTL    | 2512        | ferritin, light polypeptide                             |
| GCLM   | 2730        | glutamate-cysteine ligase, modifier subunit             |
| GPX2   | 2877        | glutathione peroxidase 2 (gastrointestinal)             |
| GSR    | 2936        | glutathione reductase                                   |
| GSTA1  | 2938        | glutathione S-transferase alpha 1                       |
| GSTA2  | 2939        | glutathione S-transferase alpha 2                       |
| NQO1   | 1728        | NAD(P)H dehydrogenase, quinone 1                        |
| PRKCE  | 5581        | protein kinase C, epsilon                               |
| SQSTM1 | 8878        | sequestosome 1                                          |
| TXNRD1 | 7296        | thioredoxin reductase 1                                 |

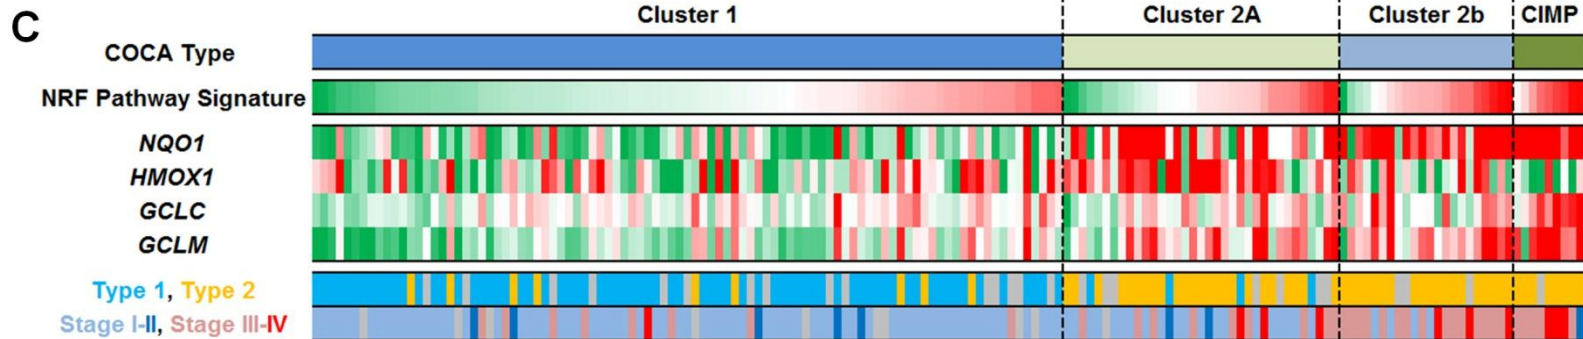

**Figure S17: mRNA Pathway Analysis Comparing Type 2 PRCC to Type 1 PRCC**

The RNA-Seq data for the 60 Type 2 PRCC tumors was compared to the 75 Type 1 PRCC tumors and the genes that demonstrated a 2 fold increase in Type 2 PRCC compared to Type 1 PRCC with a t-test p-value of  $< 0.00001$  were selected to represent the most differentially expressed genes (n=353). **(a)** This selection of 353 genes was assessed using the Ingenuity Core Analysis Software (<https://analysis.ingenuity.com/pa/>) to identify enriched biological pathways. This demonstrated that increased expression of the NRF2 mediated oxidative stress response pathway genes was enriched in Type 2 PRCC. **(b)** 15 genes within the NRF2 mediated pathway were identified within the selected 353 genes including two genes, *NQO1* and *GCLM* (highlighted in yellow), commonly associated with NRF2 activation. **(c)** A heatmap of the relative expression these two genes as well as a previously published NRF2 pathway activation mRNA signature score<sup>44</sup> was generated and ordered firstly by COCA subtype and secondly by NRF2 pathway mRNA signature score from low to high.

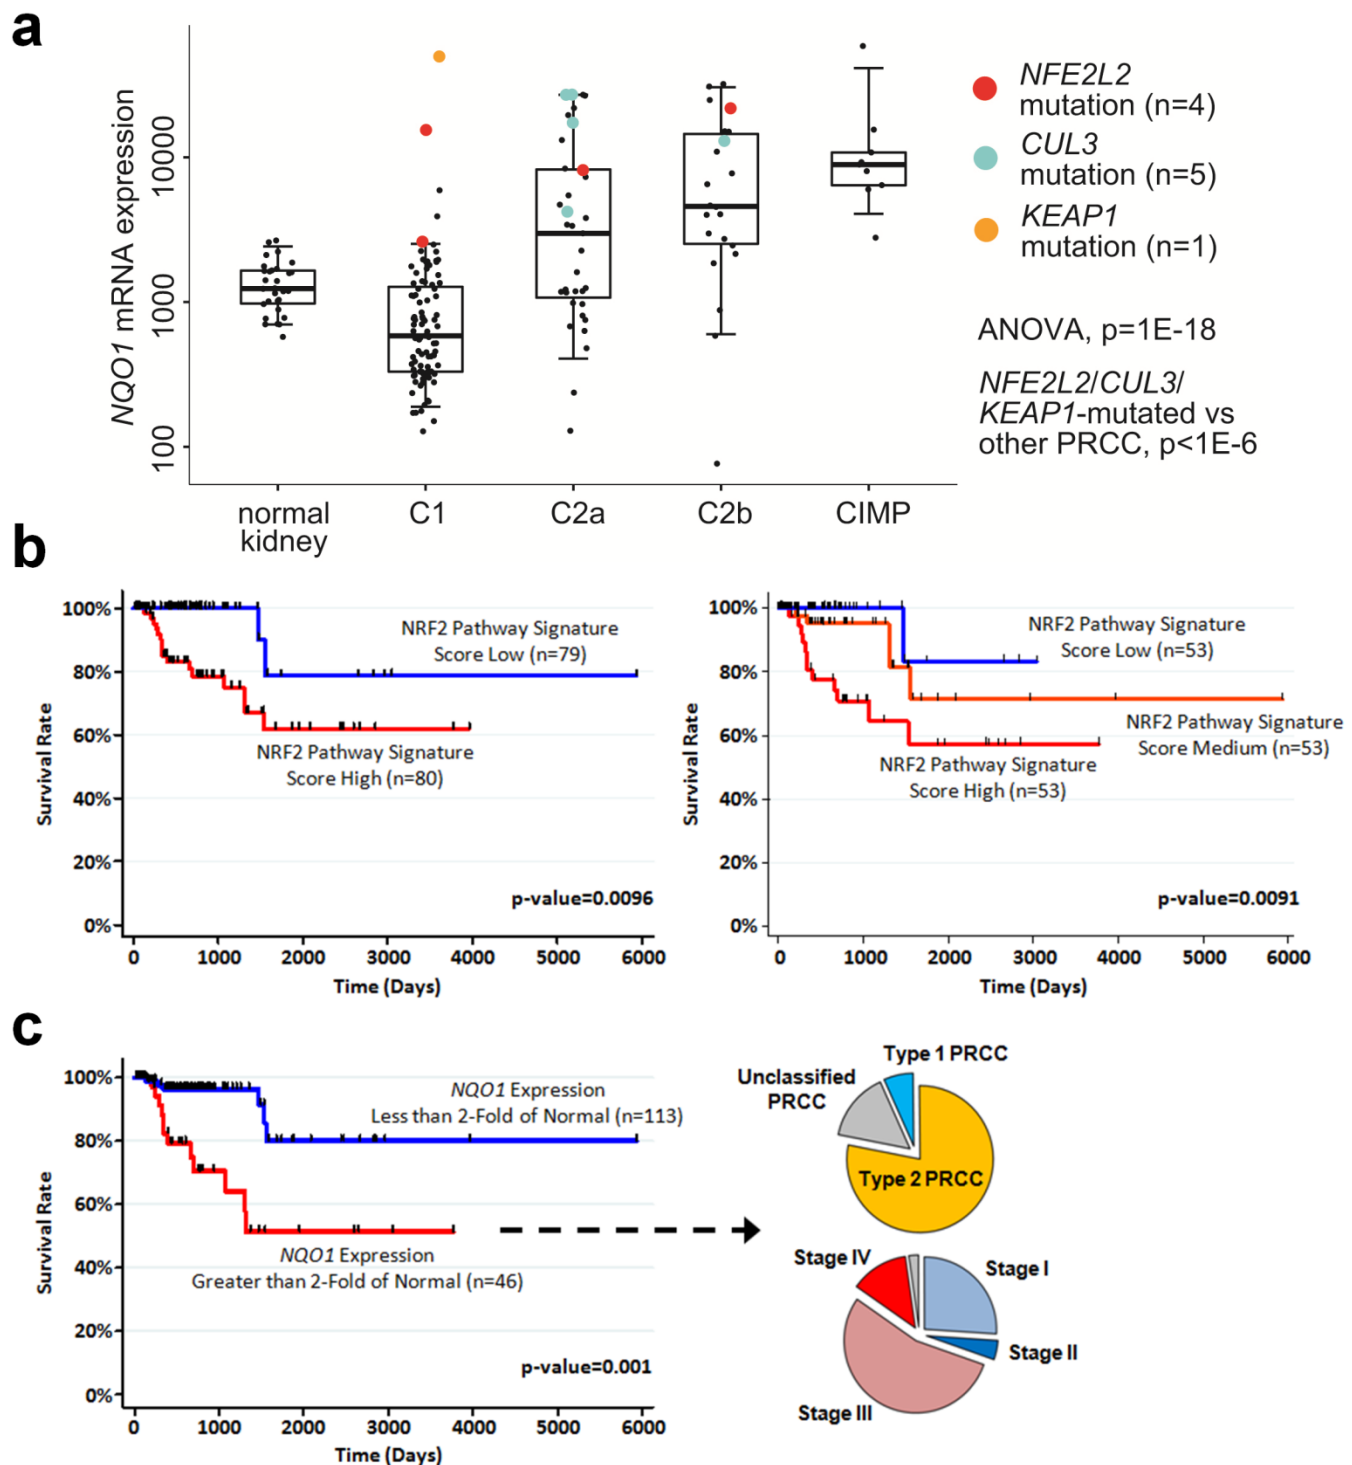

**Figure S18: Survival Analysis of the NRF2-ARE Pathway and its Critical Marker Gene, *NQO1***

(a) Differential mRNA expression of NRF2-ARE pathway marker *NQO1* among the multi-platform-based subtypes and normal kidney, with cases harboring somatic mutation in NRF2-ARE pathway members *NFE2L2*, *KEAP1*, or *CUL3* being highlighted ( $p < 1E-6$ , t-test, comparing PRCC harboring *NFE2L2*, *KEAP1*, or *CUL3* mutations with other PRCC).

(b) Kaplan-Meier survival analyses were performed comparing the PRCC tumors based on a NRF2 pathway activation mRNA signature score<sup>44</sup> with the samples either split equally into high and low score or split three ways. (2 samples lacked survival data thus  $n=159$ ).

(c) Kaplan-Meier survival analysis was performed comparing the PRCC tumors based on the expression of a critical and well-studied NRF2-ARE pathway activated gene, *NQO1*. Increased *NQO1* expression was defined being greater than 2-fold of the average expression calculated from the normal kidney samples ( $n=32$ ). The PRCC type and tumor stage breakdown is shown for the 46 tumors with increased *NQO1* expression.

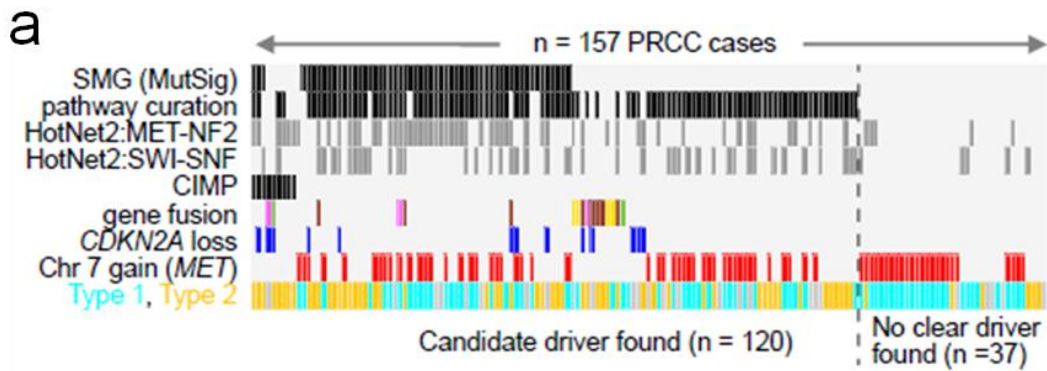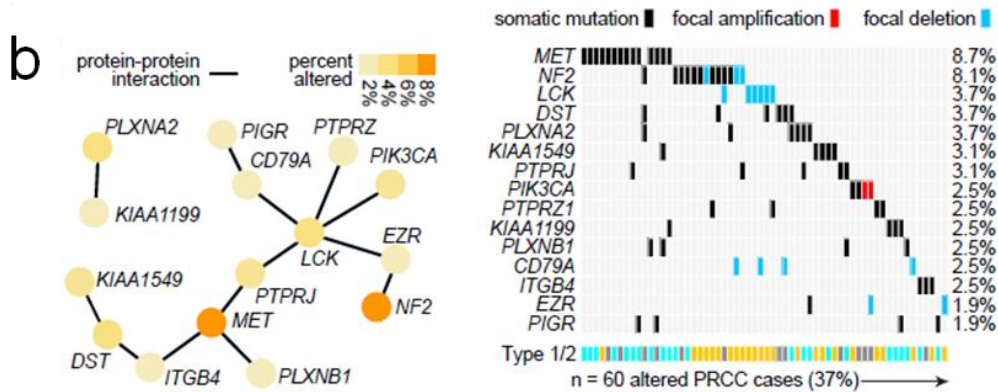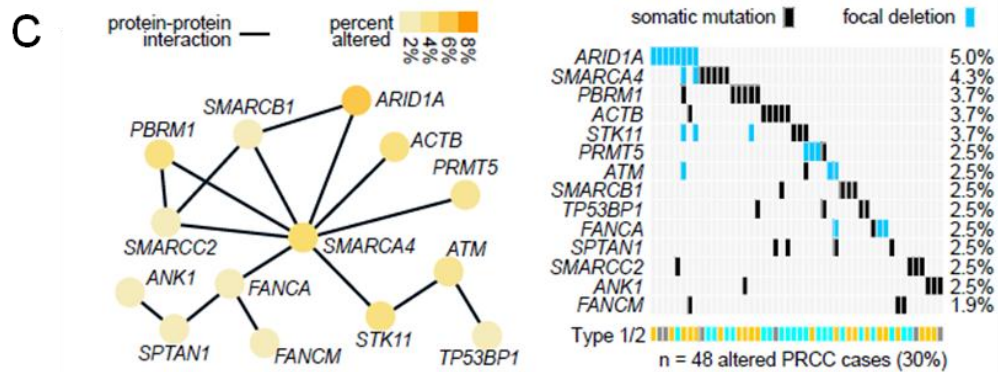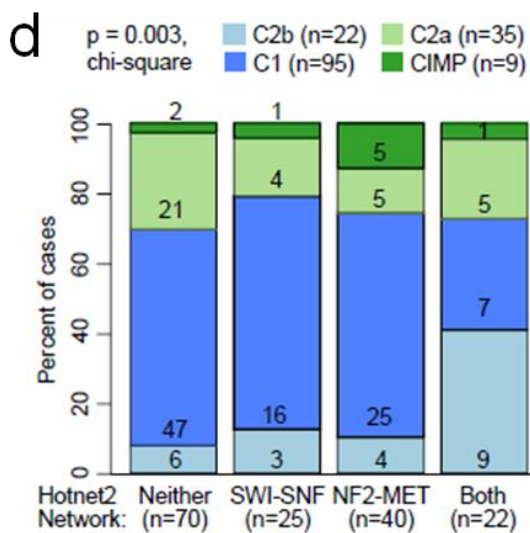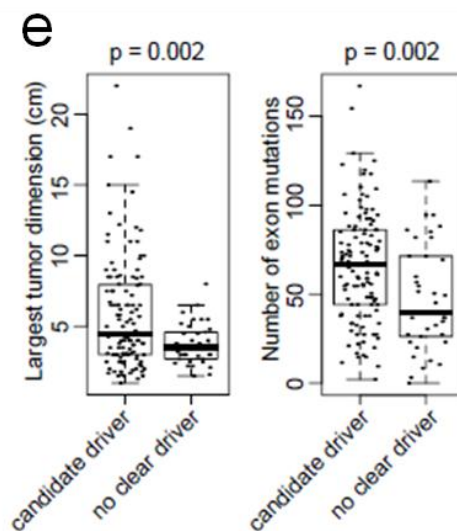



### Figure S19: Candidate Driver Mutations and HotNet2 Network analysis of PRCCs

**(a)** Candidate driver analysis in TCGA PRCC cases reveals a subset of tumors with no obvious drivers. Green bars in the SMG row indicate germline mutations of the MET gene. Colors in the gene fusion row indicate TFE3/TFEB fusions in brown, MET fusions in green, RPL11-TCEB3 fusions in pink and other remaining single instance gene fusions in yellow. The CDKN2A loss row represents samples with CDKN2A mutation, focal deletion or epigenetic silencing.

**(b-c)** By integrating mutation and focal copy number data with databases of protein-protein interactions, the HotNet2 algorithm identified two significant sub-networks ( $p < 0.03$ ): **(b)** one network involving MET and NF2 and associated genes, and **(c)** a second network involving SWI-SNF complex genes. For **(b)** and **(c)**, heat maps shown on the right display nonsilent mutation and focal deletion or amplification events in the altered PRCC cases implicated in the network.

**(d)** Association between HotNet2 subnetwork and multi-platform-based subtype assignment.

**(e)** Largest tumor dimension and number of exonic mutations was lower in PRCC cases for which no driver candidate driver was found compared to cases with candidate drivers. P-values by t-test.

2-way ANOVA: METexpr ~ Type \* Chr7gain  
 Type p= 8.11e-08 Chr7gain p= 2.43e-04

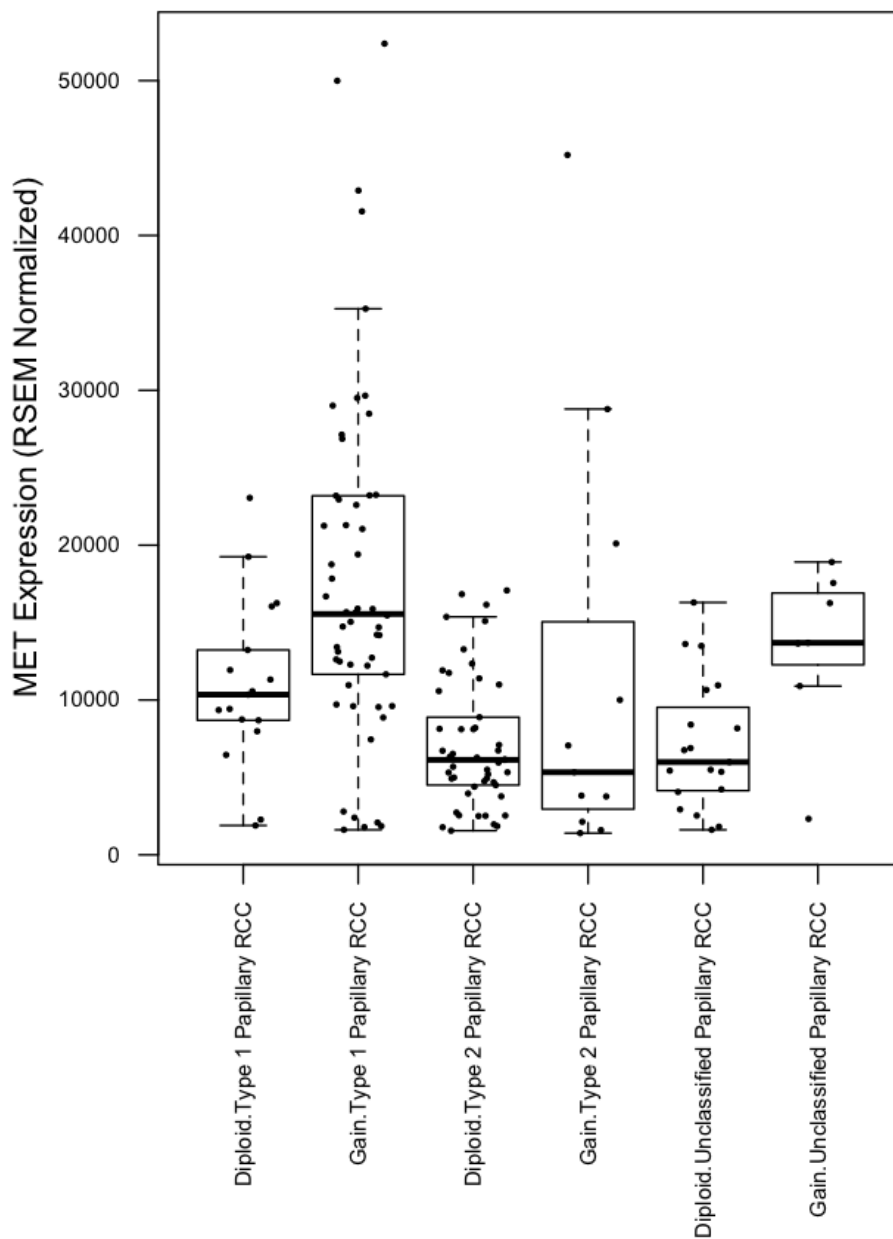

**Figure S20: *MET* Expression Dependent Upon PRCC Histological Type and *MET* Copy-Number**

The RNA-Seq data for the *MET* gene was plotted dependent upon the histological PRCC Type of each individual tumor and the presence of copy-number gain of the *MET* gene. The Type 1 PRCC and unclassified PRCC tumors demonstrated increased *MET* expression in association with *MET* copy-number gain, while the Type 2 PRCC tumors demonstrated no obvious changes in *MET* expression when associated with *MET* copy-number gain.

**a**

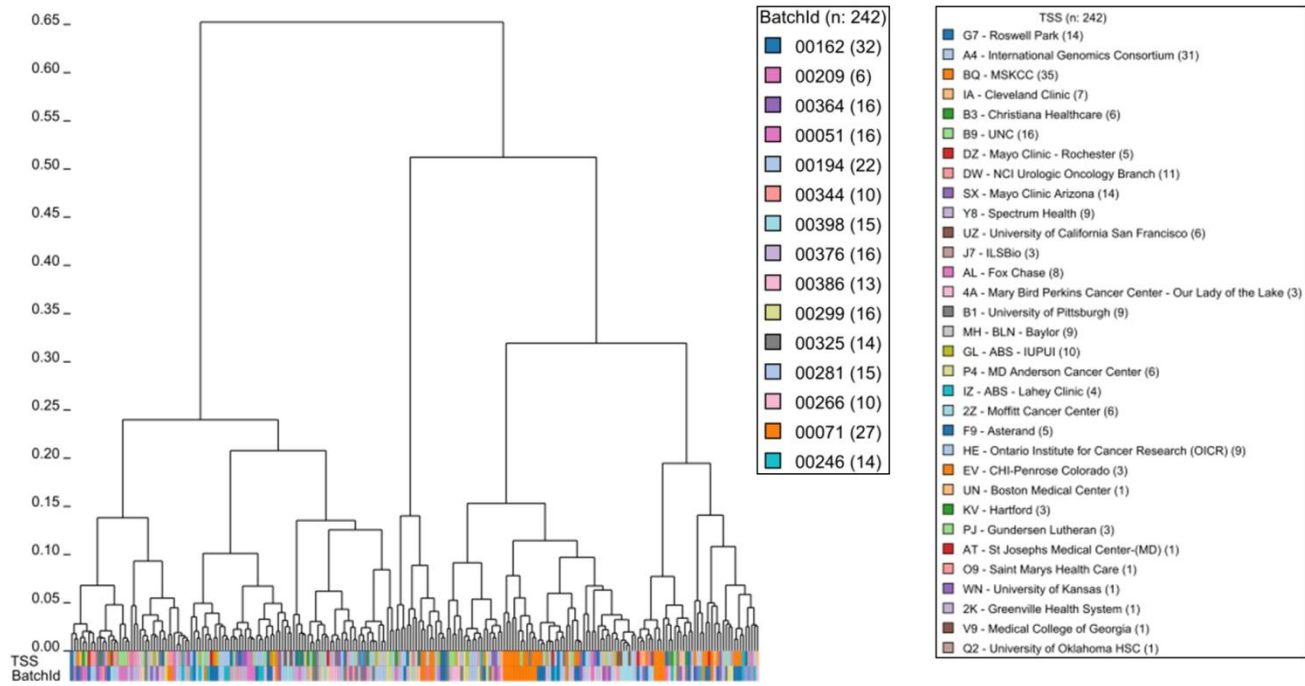

**b**

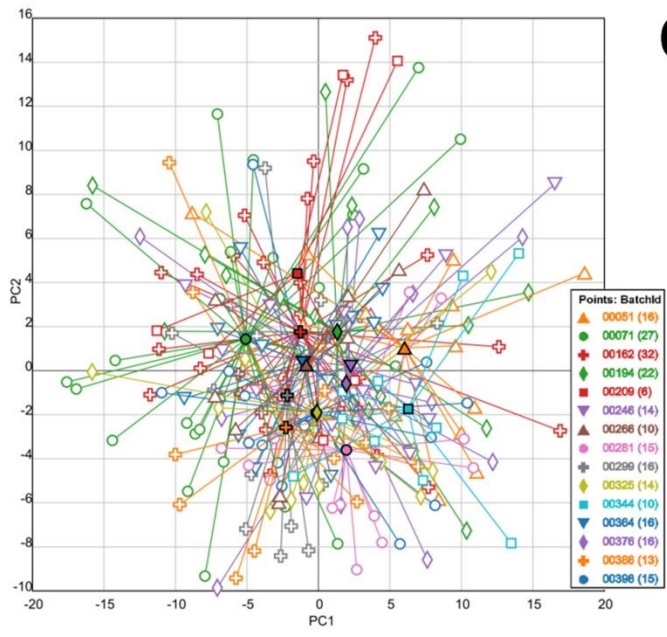

**c**

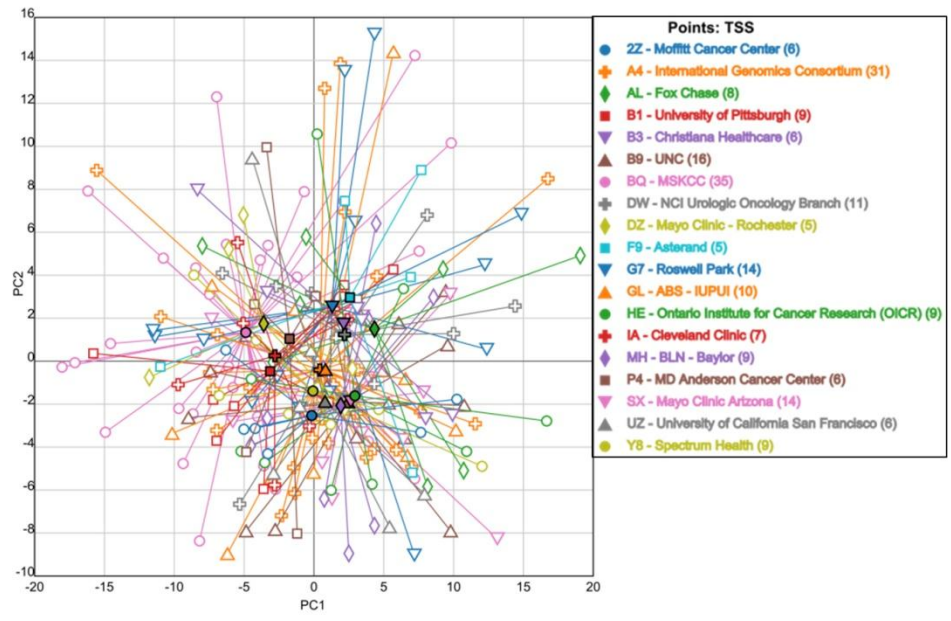

d

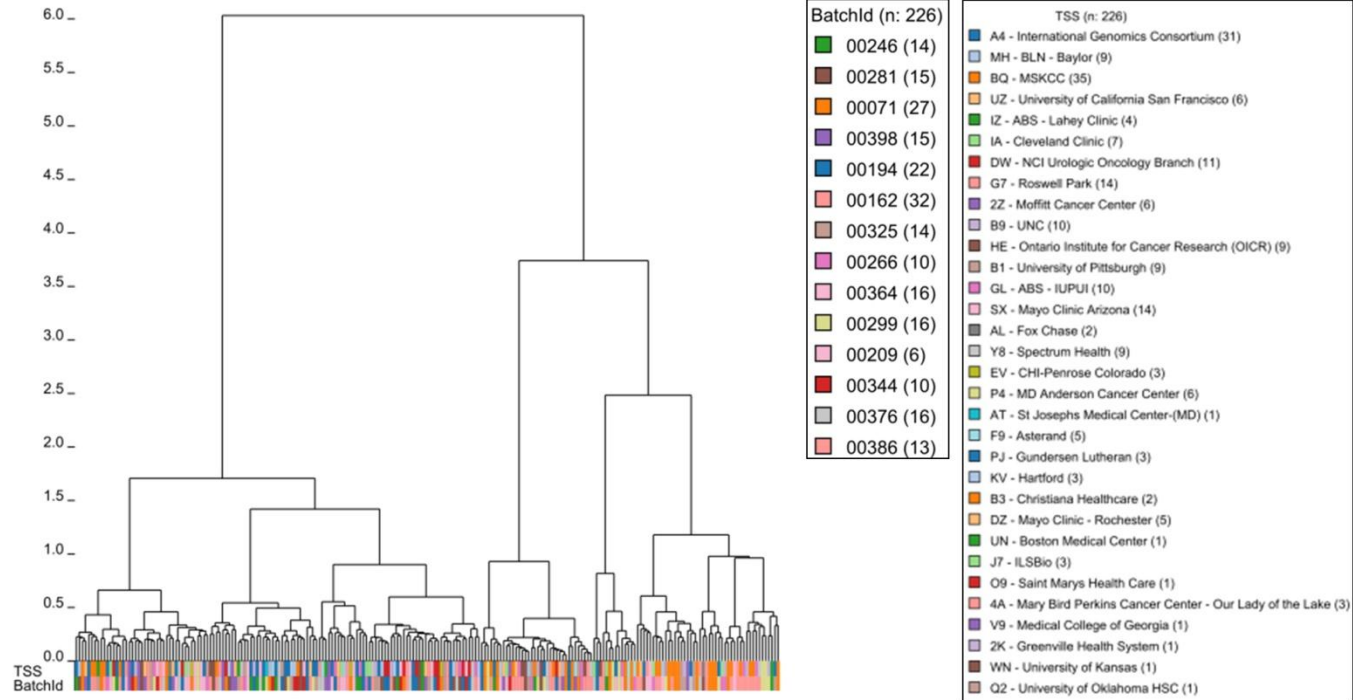

e

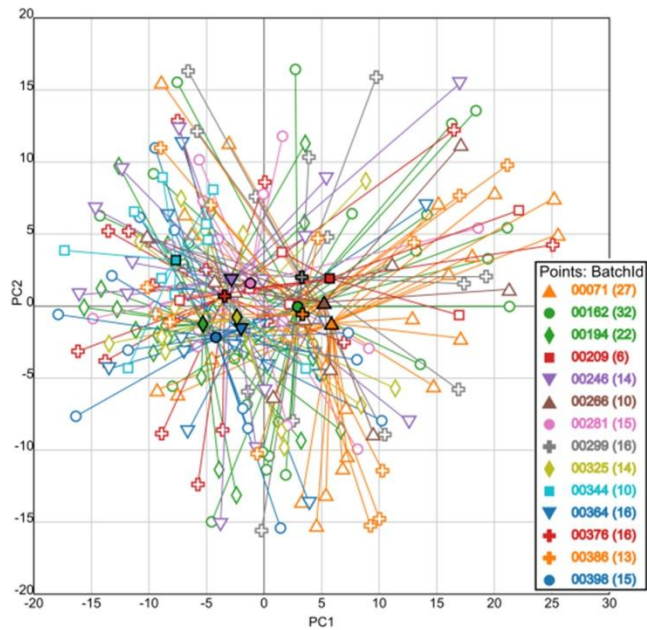

f

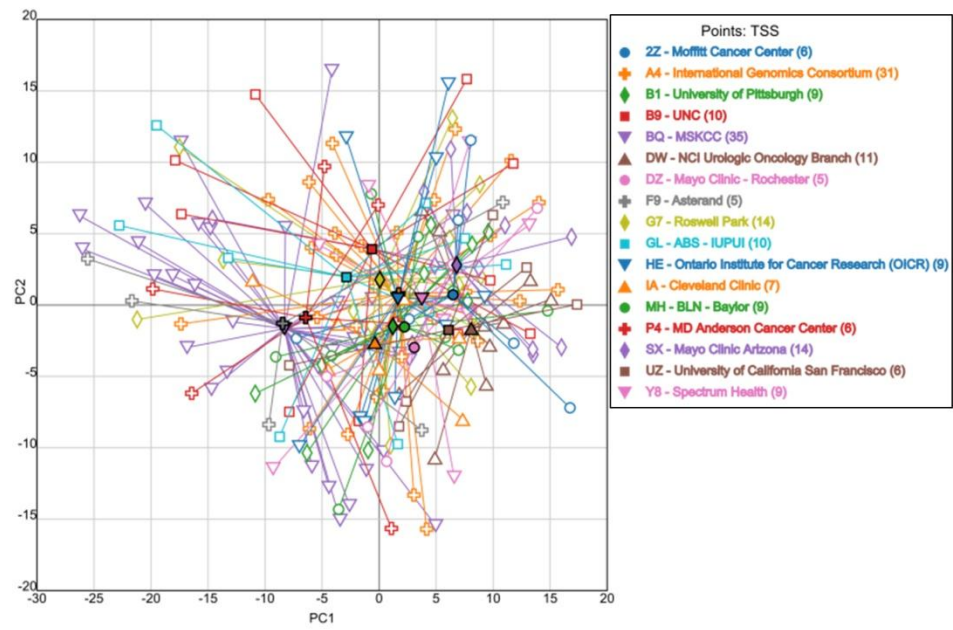

g

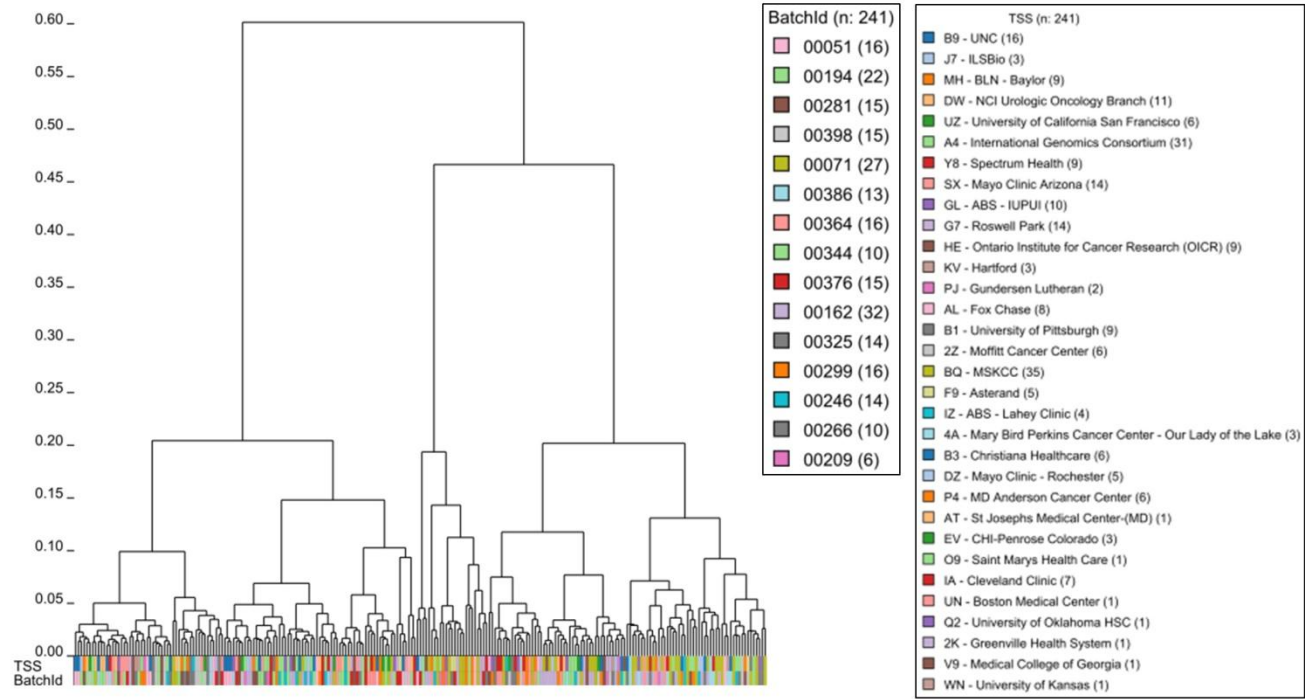

h

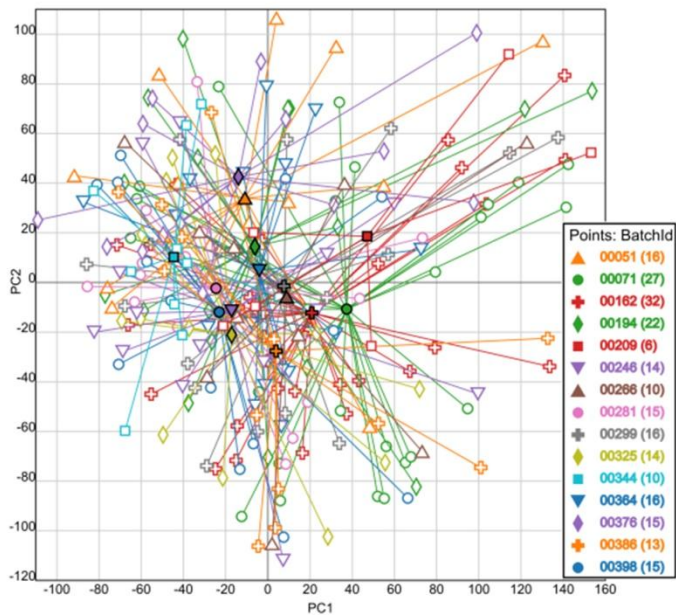

i

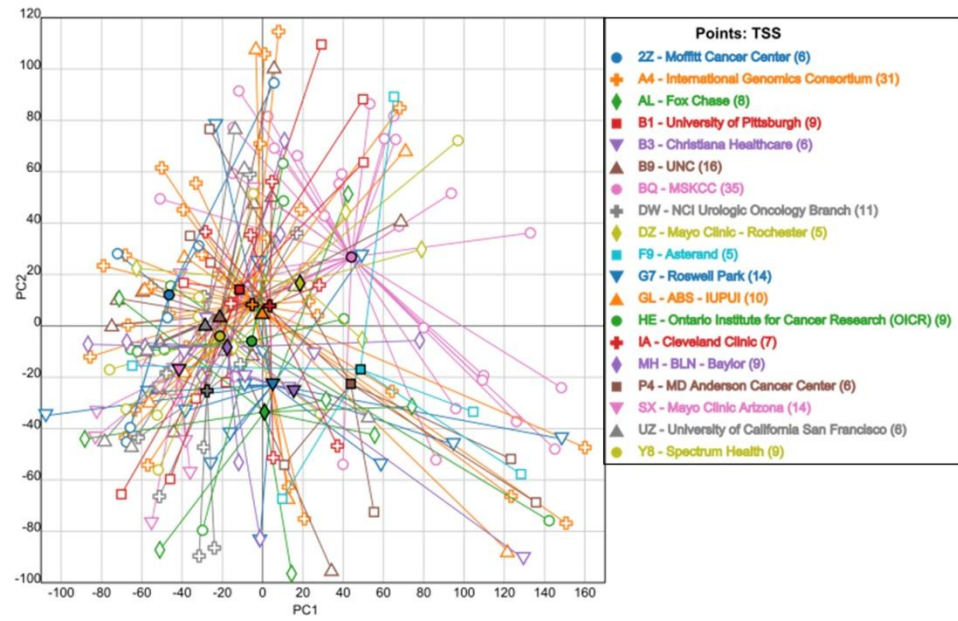

j

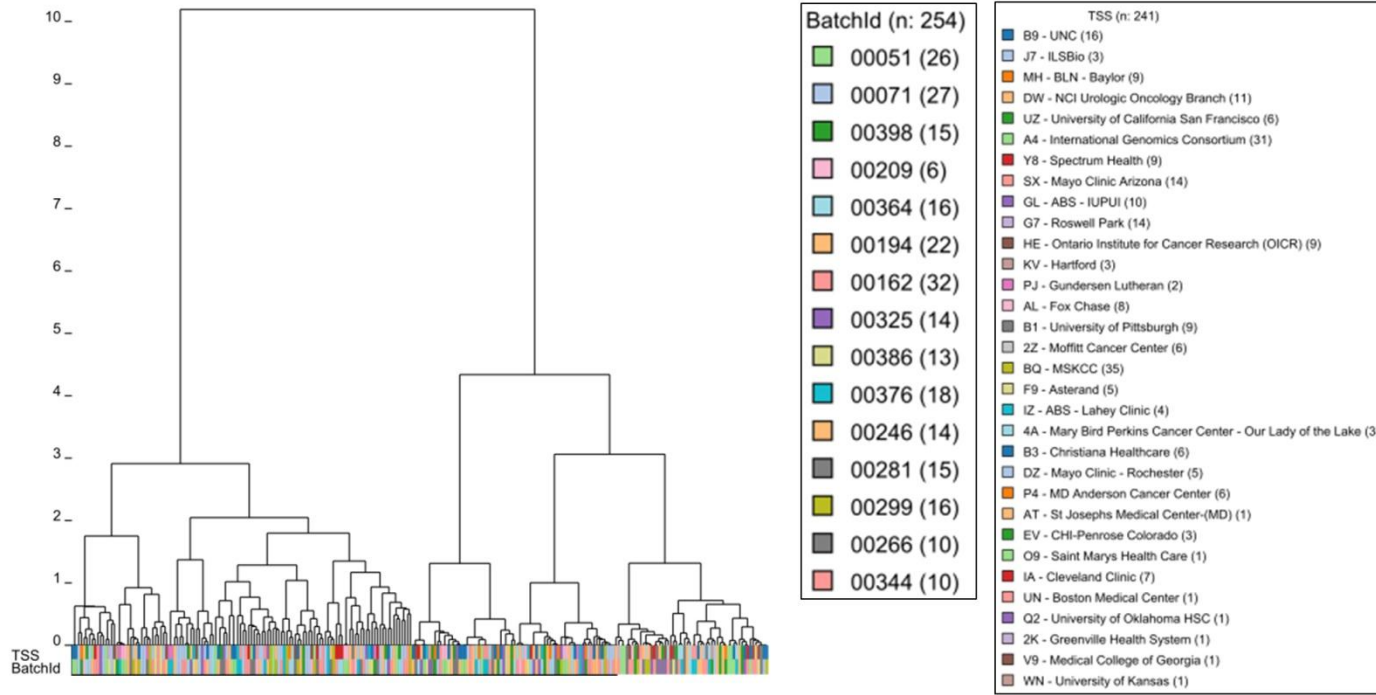

k

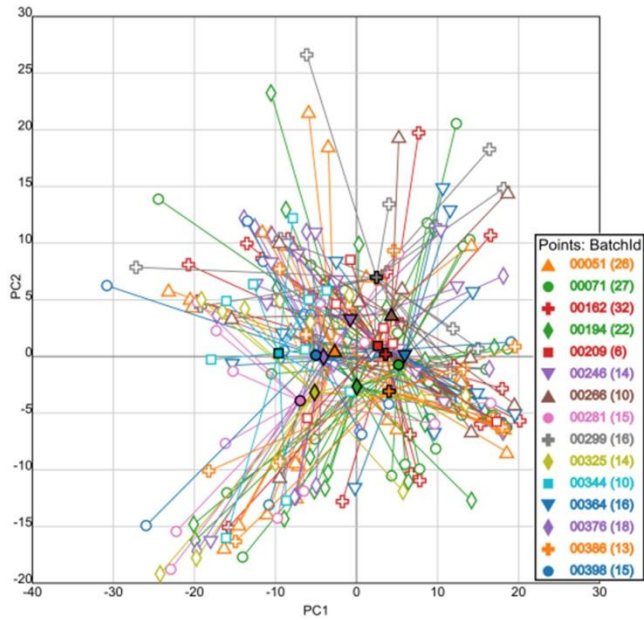

l

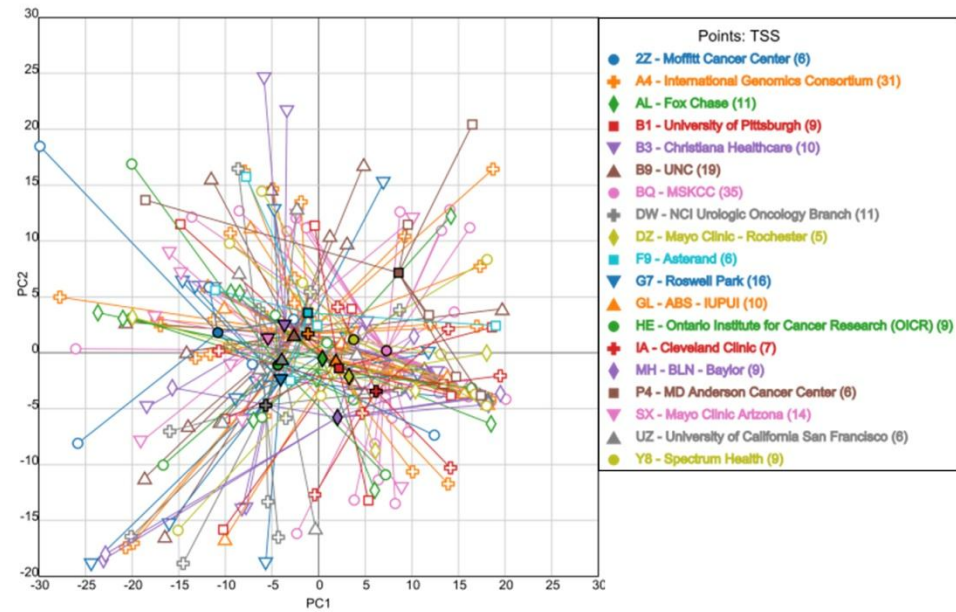

m

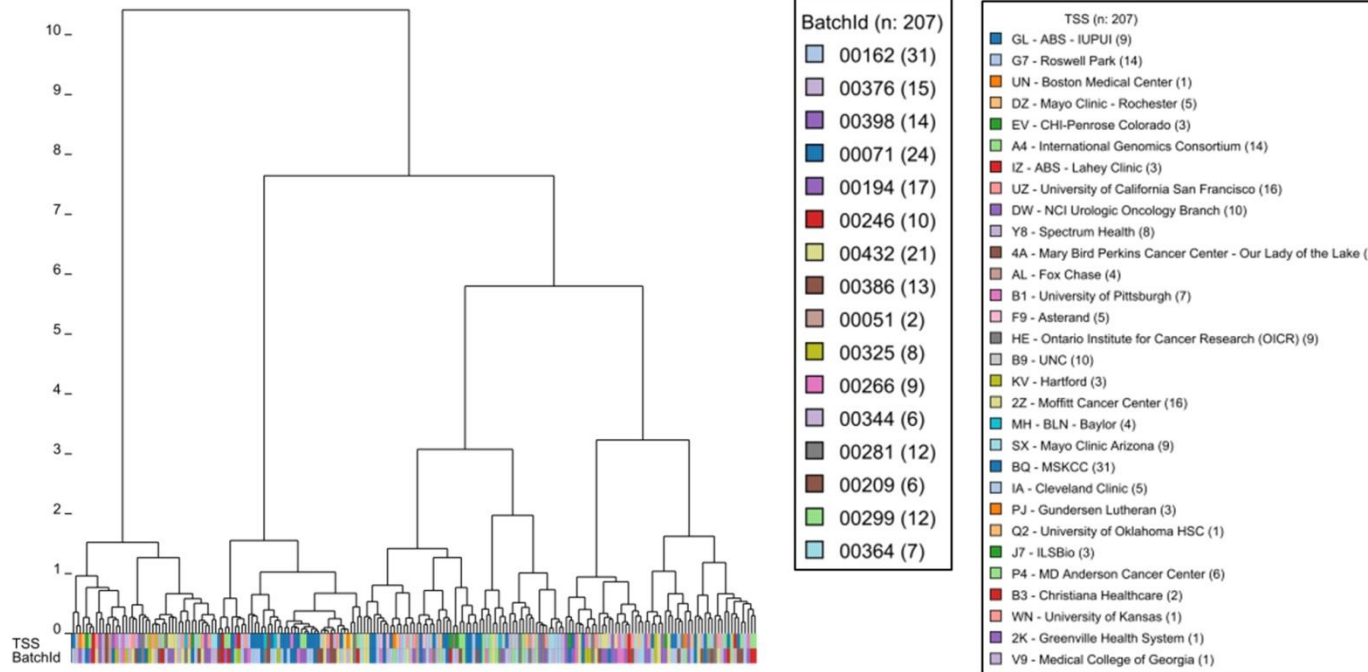

n

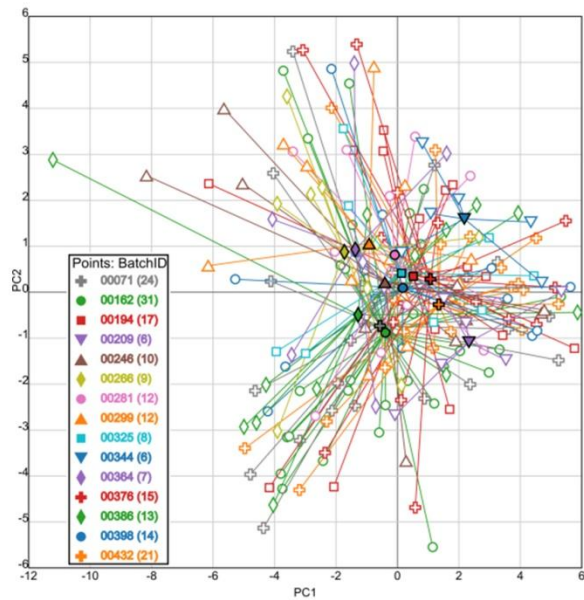

o

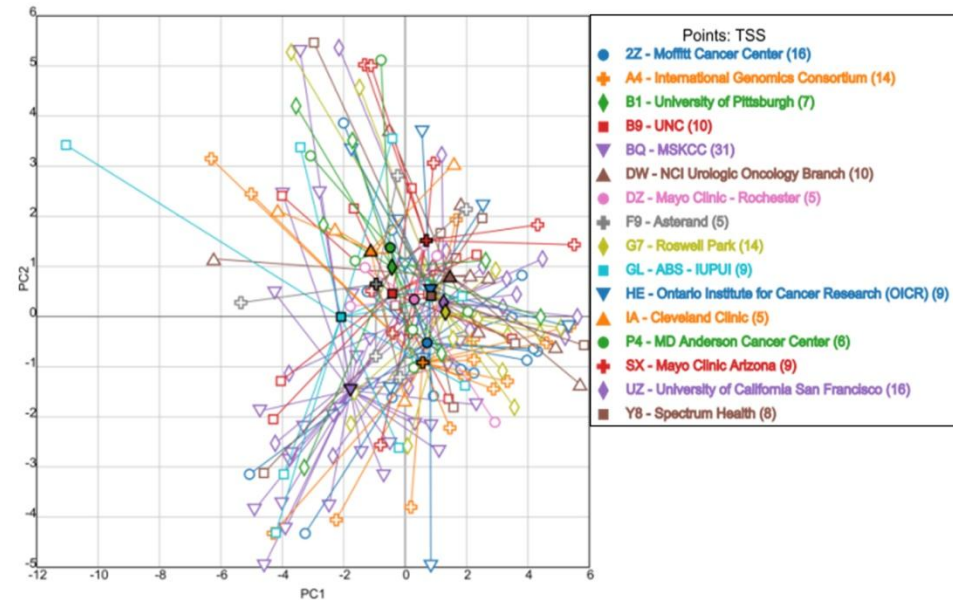

## Figure S21: Batch Effect Analysis for 161 PRCCs in the KIRP Cohort

For hierarchical clustering, we used the average linkage algorithm with 1 minus the Pearson correlation coefficient as the dissimilarity measure. The samples were clustered and then annotated them with colored bars at the bottom. Each color corresponded to a batch ID or a TSS. For PCA, we plotted the first four principal components, but only plots of the first two components are shown here. To make it easier to assess batch effects, we enhanced the traditional PCA plot with centroids. Points representing samples with the same batch ID (or TSS) were connected to the batch centroid by lines. The centroids were computed by taking the mean across all samples in the batch. That procedure produced a visual representation of the relationships among batch centroids in relation to the scatter within batches. **(a-c)** show clustering and PCA plots for miRNA-Seq data. miRNAs with zero values were removed and the read counts were  $\log_2$ -transformed before generating the figures. **(a)** Hierarchical clustering for miRNA expression from miRNA-seq data. **(b)** PCA: First two principal components for miRNA expression from miRNA-seq data, with samples connected by centroids according to batch ID. **(c)** PCA: First two principal components for miRNA expression from miRNA-seq data, with samples connected by centroids according to TSS. Although section **(a)** shows a small batch effect by batch #71, the PCA plots in **(b)** and **(c)** don't show the same batch effect. Therefore, the observed batch effect is considered minor, not warranting any special batch effects correction.

**(d-f)** show clustering and PCA plots for the Infinium DNA methylation platform. **(d)** Hierarchical clustering plot for DNA methylation data. **(e)** PCA for DNA methylation, with samples connected by centroids according to batch ID. **(f)** PCA for DNA methylation, with samples connected by centroids according to TSS. None of the batches or tissue source sites stood apart from the others, indicating no serious batch effects were present. **(g-i)** show clustering and PCA plots for the RNA-Seq platform. **(g)** Hierarchical clustering plot for mRNA expression from RNA-seq data. **(h)** PCA: First two principal components for RNA-seq, with samples connected by centroids according to batch ID. **(i)** First two principal components for RNA-seq, with samples connected by centroids according to TSS. None of the batches or tissue source sites stood apart from the others, indicating no serious batch effects were present.

**(j-l)** show clustering and PCA plots for the copy number variations using the SNP 6 platform. **(j)** Hierarchical clustering plot for mRNA expression from RNA-seq data. **(k)** PCA: First two principal components for copy number, with samples connected by centroids according to batch ID. **(l)** First two principal components for copy number, with samples connected by centroids according to TSS. None of the batches or tissue source sites stood apart from the others, indicating no serious batch effects were present.

**(m-o)** show clustering and PCA plots for RPPA data. **(m)** Hierarchical clustering plot for mRNA expression from RNA-seq data. **(n)** PCA: First two principal components for RPPA, with samples connected by centroids according to batch ID. **(o)** First two principal components for RPPA, with samples connected by centroids according to TSS. There seems to be a small batch effect by the tissue source site MSKCC, but not enough to warrant any special batch effects correction.

miRNA and RPPA data showed small batch effects, but not enough to justify any kind of batch effects correction. mRNA expression, DNA methylation, and CNV data didn't show any major batch effects.



## **List of Supplementary Tables**

Table S1: KIRP Clinical Data

Table S2: KIRP Compiled Clinical and Molecular Features Table

Table S3: Sub-Clonal Analysis of SMGs

Table S4: Genes Assessed by the Pathway Analysis

Table S5: KIRP Fusion Gene Analysis Results Table

Table S6: KIRP miRNA Analysis of Differentially Abundant Mirs

Table S7: KIRP miRNA Analysis of Anticorrelations

Table S8: KIRP mRNA Expression Analysis of Type 2 PRCC vs Type 1 PRCC

Table S9: KIRP Driver Alteration Analysis

## References

1. McCarroll SA, Kuruvilla FG, Korn JM, Cawley S, Nemesh J, Wysoker A, Shapero MH, de Bakker PI, Maller JB, Kirby A, Elliott AL, Parkin M, Hubbell E, Webster T, Mei R, Veitch J, Collins PJ, Handsaker R, Lincoln S, Nizzari M, Blume J, Jones KW, Rava R, Daly MJ, Gabriel SB, Altshuler D. Integrated detection and population genetic analysis of SNPs and copy number variation. *Nat Genet.* 40: 1166-1174 (2008).
2. Korn JM, Kuruvilla FG, McCarroll SA, Wysoker A, Nemesh J, Cawley S, Hubbell E, Veitch J, Collins PJ, Darvishi K, Lee C, Nizzari MM, Gabriel SB, Purcell S, Daly MJ, Altshuler D. Integrated genotype calling and association analysis of SNPs, common copy number polymorphisms and rare CNVs. *Nat Genet.* 40: 1253-1260 (2008).
3. The Cancer Genome Atlas Research Network, Integrated genomic analyses of Ovarian Carcinoma. *Nature* 474: 609-615 (2011).
4. Tabak B. and Beroukhim R. Manuscript in preparation.
5. Olshen AB, Venkatraman ES, Lucito R, Wigler M. Circular binary segmentation for the analysis of array based DNA copy number data. *Biostatistics* 5: 557-572 (2004).
6. Mermel CH, Schumacher SE, Hill B, Meyerson ML, Beroukhim R, Getz G. GISTIC2.0 facilitates sensitive and confident localization of the targets of focal somatic copy number alteration in human cancers. *Genome Bio.* 112: R41 (2011).
7. Carter SL, Cibulskis K, Helman E, McKenna A, Shen H, Zack T, Laird PW, Onofrio RC, Winckler W, Weir BA, Beroukhim R, Pellman D, Levine DA, Lander ES, Meyerson M, Getz G. Absolute quantification of somatic DNA alterations in human cancer. *Nature* 47: 609-615 (2011).
8. Bainbridge MN, Wang M, Wu Y, Newsham I, Muzny DM, Jefferies JL, Albert TJ, Burgess DL, Gibbs RA. Targeted enrichment beyond the consensus coding DNA sequence exome reveals exons with higher variant densities. *Genome Biol.* 12: R68 (2011).
9. Li H and Durbin R. Fast and accurate short read alignment with Burrows-Wheeler Transform. *Bioinformatics* 25: 1754-60 (2009).
10. Li H, Handsaker B, Wysoker A, Fennell T, Ruan J, Homer N, Marth G, Abecasis G, Durbin R and 1000 Genome Project Data Processing Subgroup. The Sequence alignment/map (SAM) format and SAMtools. *Bioinformatics* 25: 2078-9 (2009).
11. DePristo M, Banks E, Poplin R, Garimella K, Maguire J, Hartl C, Philippakis A, del Angel G, Rivas MA, Hanna M, McKenna A, Fennell T, Kernytzky A, Sivachenko A, Cibulskis K, Gabriel S, Altshuler D and Daly, M. A framework for variation discovery and genotyping using next-generation DNA sequencing data. *Nature Genetics.* 43: 491-498 (2011).
12. Cancer Genome Atlas Research Network. Comprehensive molecular characterization of clear cell renal cell carcinoma. *Nature* 499: 43-9 (2013).
13. Lawrence MS, Stojanov P, Mermel CH, Robinson JT, Garraway LA, Golub TR, Meyerson M, Gabriel SB, Lander ES, Getz G. Discovery and saturation analysis of cancer genes across 21 tumour types. *Nature* 505: 495-501 (2014).

14. Totoki Y, Tatsuno K, Covington KR, Ueda H, Creighton CJ, Kato M, Tsuji S, Donehower LA, Slagle BL, Nakamura H, Yamamoto S, Shinbrot E, Hama N, Lehmkuhl M, Hosoda F, Arai Y, Walker K, Dahdouli M, Gotoh K, Nagae G, Gingras MC, Muzny DM, Ojima H, Shimada K, Midorikawa Y, Goss JA, Cotton R, Hayashi A, Shibahara J, Ishikawa S, Guiteau J, Tanaka M, Urushidate T, Ohashi S, Okada N, Doddapaneni H, Wang M, Zhu Y, Dinh H, Okusaka T, Kokudo N, Kosuge T, Takayama T, Fukayama M, Gibbs RA, Wheeler DA, Aburatani H, Shibata T. Trans-ancestry mutational landscape of hepatocellular carcinoma genomes. *Nat Genet.* 46:1267-73 (2014).
15. Campan M, Weisenberger DJ, Trinh B, and Laird PW. MethyLight. *Methods in molecular biology* (Clifton, NJ), 507: 325 (2009).
16. Triche TJ Jr., Weisenberger DJ, Van Den Berg D, Laird PW, Siegmund KD. Low-level processing of Illumina Infinium DNA Methylation BeadArrays. *Nucleic Acids Res* 41: e90 (2013).
17. The Cancer Genome Atlas. Comprehensive genomic characterization of squamous cell lung cancers. *Nature* 489: 519–525 (2012).
18. Wang K, Singh D, Zeng Z, Coleman SJ, Huang Y, Savich GL, He X, Mieczkowski P, Grimm SA, Perou CM, MacLeod JN, Chiang DY, Prins JF, Liu J. MapSplice: accurate mapping of RNA-seq reads for splice junction discovery. *Nucleic acids research* 38: e178 (2010).
19. Li B and Dewey CN. RSEM: accurate transcript quantification from RNA-Seq data with or without a reference genome. *BMC bioinformatics* 12: 323 (2011).
20. Wilkerson M and Waltman P. ConsensusClusterPlus. R package version 1160. (2013).
21. McPherson A, Hormozdiari F, Zayed A, Giuliany R, Ha G, Sun MG, Griffith M, Heravi Moussavi A, Senz J, Melnyk N, Pacheco M, Marra MA, Hirst M, Nielsen TO, Sahinalp SC, Huntsman D, Shah SP. deFuse: an algorithm for gene fusion discovery in tumor RNA-Seq data. *PLoS Comput Biol.* 5: e1001138 (2011)
22. The Cancer Genome Atlas Network. Comprehensive molecular portraits of human breast tumors. *Nature.* 490: 61-70 (2012).
23. Wilks C, Cline MS, Weiler E, Diehkans M, Craft B, Martin C, Murphy D, Pierce H, Black J, Nelson D, Litzinger B, Hatton T, Maltbie L, Ainsworth M, Allen P, Rosewood L, Mitchell E, Smith B, Warner J, Groboske J, Telc H, Wilson D, Sanford B, Schmidt H, Haussler D, Maltbie D. The Cancer Genomics Hub (CGHub): overcoming cancer through the power of torrential data. *Database* (Oxford). 2014 (2014).
24. Gaujoux R, Seoighe C. A flexible R package for nonnegative matrix factorization. *BMC Bioinformatics* 11: 367 (2010).
25. Li J, Tibshirani R. Finding consistent patterns: a nonparametric approach for identifying differential expression in RNA-Seq data. *Stat Methods Med Res.* 22: 519-36 (2013).
26. Mullokandov G, Baccarini A, Ruzo A, Jayaprakash AD, Tung N, Israelow B, Evans MJ, Sachidanandam R, Brown BD. High-throughput assessment of microRNA activity and function using microRNA sensor and decoy libraries. *Nat Methods* 9: 840-6 (2012).
27. Tay Y, Rinn J, Pandolfi PP. The multilayered complexity of ceRNA crosstalk and competition. *Nature* 505: 344-52 (2014).

28. Shabalín AA. Matrix eQTL: ultra fast eQTL analysis via large matrix operations. *Bioinformatics* 28: 1353-8 (2012).
29. Hsu SD, Tseng YT, Shrestha S, Lin YL, Khaleel A, Chou CH, Chu CF, Huang HY, Lin CM, Ho SY, Jian TY, Lin FM, Chang TH, Weng SL, Liao KW, Liao IE, Liu CC, Huang HD. miRTarBase update 2014: an information resource for experimentally validated miRNA-target interactions. *Nucleic Acids Res* 42: D78-85 (2014).
30. Huang DW, Sherman BT, Lempicki RA. Systematic and integrative analysis of large gene lists using DAVID Bioinformatics Resources. *Nature Protoc.* 4: 44-57 (2009).
31. Huang DW, Sherman BT, Lempicki RA. Bioinformatics enrichment tools: paths toward the comprehensive functional analysis of large gene lists. *Nucleic Acids Res.* 37: 1-13 (2009).
32. Smoot M, Ono K, Ruscheinski J, Wang P-L, Ideker T. Cytoscape 2.8: new features for data integration and network visualization. *Bioinformatics* 27: 431–432 (2011).
33. Carter SL, Cibulskis K, Helman E, McKenna A, Shen H, Zack T, Laird PW, Onofrio RC, Winckler W, Weir BA, Beroukhim R, Pellman D, Levine DA, Lander ES, Meyerson M, Getz G. Absolute quantification of somatic DNA alterations in human cancer. *Nat Biotechnol.* 30: 413-21 (2012).
34. Robinson JT, Thorvaldsdóttir H, Winckler W, Guttman M, Lander ES, Getz G, Mesirov JP. Integrative Genomics Viewer. *Nature Biotechnology* 29: 24–26 (2013).
35. Budczies J, Klauschen F, Sinn BV, Györfy B, Schmitt WD, Darb-Esfahani S, Denkert C. Cutoff Finder: a comprehensive and straightforward Web application enabling rapid biomarker cutoff optimization. *PLoS One* 7: e51862 (2012).
36. Tibes R, Qiu Y, Lu Y, Hennessy B, Andreeff M, Mills GB, Kornblau SM. Reverse phase protein array: validation of a novel proteomic technology and utility for analysis of primary leukemia specimens and hematopoietic stem cells. *Molecular Cancer Therapeutics* 5: 2512-2521 (2006).
37. Liang J, Shao SH, Xu ZX, Hennessy B, Ding Z, Larrea M, Kondo S, Dumont DJ, Gutterman JU, Walker CL, Slingerland JM, Mills GB. The energy sensing LKB1-AMPK pathway regulates p27kip1 phosphorylation mediating the decision to enter autophagy or apoptosis. *Nat Cell Biol* 9: 218-224 (2007).
38. Hu J, He X, Baggerly KA, Coombes KR, Hennessy BT, Mills GB. Non-parametric quantification of protein lysate arrays. *Bioinformatics* 23: 1986-1994 (2007).
39. Hennessy BT, Lu Y, Poradosu E, Yu Q, Yu S, Hall H, Carey MS, Ravoori M, Gonzalez-Angulo AM, Birch R, Henderson IC, Kundra V, Mills GB : Pharmacodynamic Markers of Perifosine Efficacy. *Clinical Cancer Research* 13: 7421-7431 (2007).
40. Coombes K, Neeley S, Joy C, Hu J, Baggerly K, Roebuck P. SuperCurve: SuperCurve Package. R package version 1.4.1. (2011).
41. Gonzalez-Angulo AM, Hennessy BT, Meric-Bernstam F, Sahin A, Liu W, Ju Z, Carey MS, Myhre S, Speers C, Deng L, Broaddus R, Lluch A, Aparicio S, Brown P, Pusztai L, Symmans WF, Alsner J, Overgaard J, Borresen-Dale AL, Hortobagyi GN, Coombes KR, Mills GB. Functional proteomics can define prognosis and predict pathologic complete response in patients with breast cancer. *Clin Proteomics* 8: 11 (2011).

42. Hennessy BT, Lu Y, Gonzalez-Angulo AM, Carey MS, Myhre S, Ju Z, Davies MA, Liu W, Coombes K, Meric-Bernstam F, Bedrosian I, McGahren M, Agarwal R, Zhang F, Overgaard J, Alsner J, Neve RM, Kuo WL, Gray JW, Borresen-Dale AL, Mills GB. A Technical Assessment of the Utility of Reverse Phase Protein Arrays for the Study of the Functional Proteome in Non-microdissected. Human Breast Cancers. *Clin Proteomics* 6: 129-151 (2010).
43. Whitfield ML, Sherlock G, Saldanha AJ, Murray JI, Ball CA, Alexander KE, Matese JC, Perou CM, Hurt MM, Brown PO, Botstein D. Identification of genes periodically expressed in the human cell cycle and their expression in tumors. *Mol Biol Cell* 13: 1977-2000 (2002)
44. Abazeed ME, Adams DJ, Hurov KE, Tamayo P, Creighton CJ, Sonkin D, Giacomelli AO, Du C, Fries DF, Wong KK, Mesirov JP, Loeffler JS, Schreiber SL, Hammerman PS, Meyerson M. Integrative radiogenomic profiling of squamous cell lung cancer. *Cancer Res* 73: 6289-6298 (2013).
